# Supplementary material for: Is the effect of person-organisation fit on turnover intention mediated by job satisfaction? A survey of community health workers in China
Source: PubMed Central journal article supplement (PMC5337699; doi:10.1136/bmjopen-2016-013872), 2017-02-20
Supplement: bmjopen-2016-013872supp.pdf [file bmjopen-2016-013872supp.pdf]

variable definition is at the end of the file

| ID | ORG | ORGID | DISTRICT | province | rank | quotastat | GENDER | MARRI | AGE | agegrp | WORKYEAR | post2 | FULLTIME | mngment |
|----|-----|-------|----------|----------|------|-----------|--------|-------|-----|--------|----------|-------|----------|---------|
| 1  | 安康  | 32    | 4        | 2        | 2    | 1         | 0      | 1     | 21  | 1      | 1        | 6     | 1        | 2       |
| 2  | 安康  | 32    | 4        | 2        | 2    | 2         | 0      | 1     | 21  | 1      | 2        | 6     | 1        | 2       |
| 3  | 安康  | 32    | 4        | 2        | 1    | 2         | 0      | 1     | 23  | 1      | 1        | 4     | #NULL!   | 2       |
| 4  | 安康  | 32    | 4        | 2        | 1    | 2         | 0      | 1     | 24  | 1      | 3        | 6     | 1        | 2       |
| 5  | 安康  | 32    | 4        | 2        | 1    | 1         | 0      | 2     | 25  | 1      | 5        | 6     | 1        | 2       |
| 6  | 安康  | 32    | 4        | 2        | 1    | 2         | 0      | 1     | 26  | 1      | 1        | 1     | 1        | 2       |
| 7  | 安康  | 32    | 4        | 2        | 2    | 2         | 0      | 2     | 26  | 1      | 3        | 3     | 1        | 2       |
| 8  | 安康  | 32    | 4        | 2        | 3    | 1         | 0      | 1     | 26  | 1      | 3        | 3     | 1        | 2       |
| 9  | 安康  | 32    | 4        | 2        | 2    | 2         | 0      | 2     | 27  | 1      | 1        | 3     | 1        | 2       |
| 10 | 安康  | 32    | 4        | 2        | 2    | 2         | 0      | 2     | 27  | 1      | 7        | 5     | 1        | 2       |
| 11 | 安康  | 32    | 4        | 2        | 2    | 1         | 0      | 2     | 29  | 1      | 5        | 5     | 1        | 2       |
| 12 | 安康  | 32    | 4        | 2        | 3    | 1         | 0      | 2     | 34  | 2      | 1        | 5     | 1        | 2       |
| 13 | 安康  | 32    | 4        | 2        | 2    | 3         | 0      | 2     | 37  | 2      | 13       | 5     | 1        | 2       |
| 14 | 安康  | 32    | 4        | 2        | 2    | 3         | 0      | 2     | 38  | 2      | 15       | 6     | 1        | #NULL!  |
| 15 | 安康  | 32    | 4        | 2        | 2    | 1         | 0      | 2     | 39  | 2      | 15       | 3     | 1        | 2       |
| 16 | 安康  | 32    | 4        | 2        | 3    | 3         | 0      | 2     | 51  | 4      | 32       | 2     | #NULL!   | 2       |
| 17 | 安康  | 32    | 4        | 2        | 3    | 1         | 0      | 2     | 53  | 4      | 37       | 1     | 1        | 2       |
| 18 | 安康  | 32    | 4        | 2        | 1    | 1         | 1      | 1     | 24  | 1      | 1        | 4     | 1        | 2       |
| 19 | 安康  | 32    | 4        | 2        | 1    | 1         | 1      | 1     | 27  | 1      | 6        | 6     | 1        | 2       |
| 20 | 安康  | 32    | 4        | 2        | 2    | 1         | 1      | 2     | 32  | 2      | 6        | 2     | 1        | 2       |
| 21 | 柏景湾 | 3     | 1        | 1        | 2    | 2         | 0      | 1     | 22  | 1      | 1        | 5     | 2        | 2       |
| 22 | 柏景湾 | 3     | 1        | 1        | 2    | 1         | 0      | 1     | 22  | 1      | 2        | 5     | 1        | 2       |
| 23 | 柏景湾 | 3     | 1        | 1        | 2    | 2         | 0      | 2     | 56  | 4      | 30       | 2     | 2        | 2       |
| 24 | 柏景湾 | 3     | 1        | 1        | 2    | 2         | 1      | 2     | 36  | 2      | 10       | 2     | 2        | 2       |
| 25 | 宝铁  | 54    | 5        | 3        | 2    | 2         | 0      | 2     | 25  | 1      | 2        | 6     | 1        | 2       |
| 26 | 宝铁  | 54    | 5        | 3        | 2    | 1         | 0      | 2     | 32  | 2      | 10       | 4     | 2        | 2       |
| 27 | 宝铁  | 54    | 5        | 3        | 2    | 2         | 0      | 2     | 32  | 2      | 12       | 2     | 1        | 2       |
| 28 | 宝铁  | 54    | 5        | 3        | 2    | 1         | 0      | 2     | 37  | 2      | 16       | 2     | 2        | 2       |
| 29 | 宝铁  | 54    | 5        | 3        | 3    | 2         | 0      | 2     | 55  | 4      | 37       | 5     | 2        | 2       |
| 30 | 北站  | 60    | 7        | 4        | 2    | 2         | 0      | 1     | 23  | 1      | 3        | 5     | 1        | 2       |
| 31 | 北站  | 60    | 7        | 4        | 1    | 1         | 0      | 1     | 25  | 1      | 4        | 5     | 1        | 2       |
| 32 | 北站  | 60    | 7        | 4        | 2    | 2         | 0      | 1     | 26  | 1      | 4        | 4     | 1        | 2       |
| 33 | 北站  | 60    | 7        | 4        | 2    | 2         | 0      | 2     | 27  | 1      | 4        | 2     | 1        | 2       |
| 34 | 北站  | 60    | 7        | 4        | 2    | 1         | 0      | 1     | 27  | 1      | 5        | 5     | 1        | 2       |

| ID | ORG | ORGID | DISTRICT | province | rank | quotastat | GENDER | MARRI | AGE | agegrp | WORKYEAR | post2 | FULLTIME | mngment |
|----|-----|-------|----------|----------|------|-----------|--------|-------|-----|--------|----------|-------|----------|---------|
| 35 | 北站  | 60    | 7        | 4        | 3    | 1         | 0      | 2     | 30  | 2      | 9        | 2     | 1        | 2       |
| 36 | 北站  | 60    | 7        | 4        | 2    | 1         | 0      | 2     | 33  | 2      | 14       | 5     | 1        | 2       |
| 37 | 北站  | 60    | 7        | 4        | 2    | 1         | 0      | 2     | 33  | 2      | 14       | 5     | 1        | #NULL!  |
| 38 | 北站  | 60    | 7        | 4        | 3    | 1         | 0      | 3     | 35  | 2      | 17       | 5     | 1        | 1       |
| 39 | 北站  | 60    | 7        | 4        | 3    | 1         | 0      | 2     | 42  | 3      | 22       | 5     | 1        | 1       |
| 40 | 北站  | 60    | 7        | 4        | 3    | 1         | 0      | 2     | 45  | 3      | 23       | 2     | 1        | 1       |
| 41 | 北站  | 60    | 7        | 4        | 2    | 1         | 0      | 2     | 47  | 3      | 26       | 2     | 1        | 2       |
| 42 | 北站  | 60    | 7        | 4        | 3    | 1         | 1      | 2     | 35  | 2      | 13       | 2     | 1        | 1       |
| 43 | 北站  | 60    | 7        | 4        | 2    | 2         | 1      | 2     | 37  | 2      | 12       | 3     | 1        | 2       |
| 44 | 北站  | 60    | 7        | 4        | 3    | 1         | 1      | 2     | 37  | 2      | 13       | 2     | 1        | 2       |
| 45 | 北站  | 60    | 7        | 4        | 3    | 2         | 1      | 2     | 40  | 3      | 11       | 2     | 1        | 2       |
| 46 | 北站  | 60    | 7        | 4        | 2    | 1         | 1      | 1     | 40  | 3      | 18       | 2     | 1        | 2       |
| 47 | 亳州路 | 2     | 1        | 1        | 2    | 2         | 0      | 2     | 26  | 1      | 4        | 5     | 1        | 2       |
| 48 | 亳州路 | 2     | 1        | 1        | 2    | 2         | 0      | 2     | 27  | 1      | 6        | 5     | 1        | 2       |
| 49 | 亳州路 | 2     | 1        | 1        | 2    | 2         | 0      | 2     | 27  | 1      | 15       | 2     | 1        | 2       |
| 50 | 亳州路 | 2     | 1        | 1        | 2    | 2         | 0      | 1     | 29  | 1      | 5        | 5     | 1        | 2       |
| 51 | 亳州路 | 2     | 1        | 1        | 2    | 2         | 0      | 2     | 31  | 2      | 11       | 2     | 1        | 2       |
| 52 | 亳州路 | 2     | 1        | 1        | 2    | 1         | 0      | 2     | 32  | 2      | 11       | 5     | 1        | 2       |
| 53 | 亳州路 | 2     | 1        | 1        | 2    | 1         | 0      | 2     | 32  | 2      | 11       | 6     | #NULL!   | 2       |
| 54 | 亳州路 | 2     | 1        | 1        | 2    | 2         | 0      | 2     | 34  | 2      | 13       | 5     | 1        | 2       |
| 55 | 亳州路 | 2     | 1        | 1        | 2    | 2         | 0      | 2     | 34  | 2      | 14       | 5     | 1        | 2       |
| 56 | 亳州路 | 2     | 1        | 1        | 2    | 1         | 0      | 2     | 34  | 2      | 16       | 5     | 1        | 1       |
| 57 | 亳州路 | 2     | 1        | 1        | 2    | 2         | 0      | 2     | 38  | 2      | 20       | 2     | 1        | 2       |
| 58 | 亳州路 | 2     | 1        | 1        | 2    | 1         | 0      | 2     | 43  | 3      | 18       | 5     | 1        | 2       |
| 59 | 亳州路 | 2     | 1        | 1        | 4    | 1         | 0      | 2     | 49  | 3      | 25       | 6     | 1        | 2       |
| 60 | 亳州路 | 2     | 1        | 1        | 3    | 1         | 0      | 2     | 53  | 4      | 33       | 6     | 1        | 2       |
| 61 | 亳州路 | 2     | 1        | 1        | 2    | 2         | 1      | 2     | 34  | 2      | 9        | 2     | 1        | 1       |
| 62 | 亳州路 | 2     | 1        | 1        | 3    | 1         | 1      | 2     | 35  | 2      | 14       | 2     | 1        | 2       |
| 63 | 亳州路 | 2     | 1        | 1        | 3    | 2         | 1      | 2     | 42  | 3      | 14       | 2     | 1        | 1       |
| 64 | 亳州路 | 2     | 1        | 1        | 4    | 1         | 1      | 2     | 46  | 3      | 21       | 3     | 1        | 2       |
| 65 | 亳州路 | 2     | 1        | 1        | 2    | 1         | 1      | 2     | 54  | 4      | 33       | 1     | 1        | 2       |
| 66 | 大湖  | 12    | 2        | 1        | 2    | 2         | 0      | 1     | 28  | 1      | 5        | 5     | 1        | 2       |
| 67 | 大湖  | 12    | 2        | 1        | 2    | 2         | 0      | 2     | 34  | 2      | 4        | 5     | 1        | 2       |
| 68 | 大湖  | 12    | 2        | 1        | 3    | 1         | 0      | 2     | 40  | 3      | 20       | 5     | 1        | 2       |

| ID  | ORG | ORGID | DISTRICT | province | rank | quotastat | GENDER | MARRI | AGE | agegrp | WORKYEAR | post2 | FULLTIME | mngment |
|-----|-----|-------|----------|----------|------|-----------|--------|-------|-----|--------|----------|-------|----------|---------|
| 69  | 大庆  | 50    | 5        | 3        | 2    | 3         | 0      | 2     | 30  | 2      | 8        | 5     | #NULL!   | 2       |
| 70  | 大庆  | 50    | 5        | 3        | 2    | 3         | 0      | 2     | 40  | 3      | 20       | 5     | 2        | 2       |
| 71  | 大庆  | 50    | 5        | 3        | 2    | 3         | 1      | 2     | 49  | 3      | 25       | 4     | #NULL!   | 2       |
| 72  | 代王  | 56    | 6        | 3        | 2    | 1         | 0      | 1     | 25  | 1      | 2        | 6     | 1        | 2       |
| 73  | 代王  | 56    | 6        | 3        | 2    | 1         | 0      | 2     | 31  | 2      | 5        | 6     | 1        | 2       |
| 74  | 代王  | 56    | 6        | 3        | 2    | 1         | 0      | 2     | 34  | 2      | 13       | 5     | 1        | 2       |
| 75  | 代王  | 56    | 6        | 3        | 2    | 1         | 0      | 2     | 34  | 2      | 13       | 5     | 1        | 2       |
| 76  | 代王  | 56    | 6        | 3        | 3    | 1         | 0      | 2     | 36  | 2      | 17       | 5     | 1        | 2       |
| 77  | 代王  | 56    | 6        | 3        | 2    | 1         | 0      | 2     | 45  | 3      | 19       | 2     | #NULL!   | 2       |
| 78  | 代王  | 56    | 6        | 3        | 3    | 1         | 0      | 2     | 45  | 3      | 25       | 5     | 1        | 1       |
| 79  | 代王  | 56    | 6        | 3        | 3    | 1         | 0      | 2     | 51  | 4      | 30       | 2     | 1        | 2       |
| 80  | 代王  | 56    | 6        | 3        | 2    | 1         | 1      | 1     | 30  | 2      | 5        | 4     | 1        | 2       |
| 81  | 代王  | 56    | 6        | 3        | 2    | 1         | 1      | 2     | 34  | 2      | 8        | 2     | 1        | 1       |
| 82  | 代王  | 56    | 6        | 3        | 3    | 1         | 1      | 2     | 45  | 3      | 22       | 6     | 1        | 2       |
| 83  | 德宽  | 15    | 2        | 1        | 2    | 2         | 0      | 1     | 20  | 1      | 1        | 5     | 1        | 2       |
| 84  | 德宽  | 15    | 2        | 1        | 2    | 2         | 0      | 1     | 22  | 1      | 1        | 5     | 2        | 2       |
| 85  | 德宽  | 15    | 2        | 1        | 2    | 1         | 0      | 1     | 23  | 1      | 1        | 5     | 1        | 2       |
| 86  | 德宽  | 15    | 2        | 1        | 2    | 2         | 0      | 1     | 24  | 1      | 2        | 6     | 1        | 2       |
| 87  | 德宽  | 15    | 2        | 1        | 2    | 2         | 0      | 2     | 34  | 2      | 12       | 2     | 1        | 2       |
| 88  | 德宽  | 15    | 2        | 1        | 2    | 2         | 0      | 2     | 35  | 2      | 6        | 2     | 1        | 2       |
| 89  | 德宽  | 15    | 2        | 1        | 2    | 2         | 0      | 2     | 42  | 3      | 20       | 5     | 1        | 2       |
| 90  | 德宽  | 15    | 2        | 1        | 3    | 2         | 0      | 2     | 43  | 3      | 20       | 4     | #NULL!   | 2       |
| 91  | 德宽  | 15    | 2        | 1        | 2    | 2         | 1      | 2     | 31  | 2      | 5        | 3     | 1        | 1       |
| 92  | 德宽  | 15    | 2        | 1        | 3    | 2         | 1      | 2     | 47  | 3      | 30       | 2     | 1        | 1       |
| 93  | 甸柳  | 23    | 3        | 2        | 2    | 2         | 0      | 1     | 20  | 1      | 5        | 5     | 1        | 2       |
| 94  | 甸柳  | 23    | 3        | 2        | 2    | 2         | 0      | 1     | 23  | 1      | 2        | 5     | 1        | 2       |
| 95  | 甸柳  | 23    | 3        | 2        | 2    | 2         | 0      | 2     | 27  | 1      | 2        | 2     | 1        | 2       |
| 96  | 甸柳  | 23    | 3        | 2        | 2    | 2         | 0      | 1     | 28  | 1      | 3        | 4     | 1        | 2       |
| 97  | 甸柳  | 23    | 3        | 2        | 2    | 2         | 0      | 2     | 28  | 1      | 6        | 5     | 1        | 2       |
| 98  | 甸柳  | 23    | 3        | 2        | 2    | 2         | 0      | 1     | 28  | 1      | 6        | 5     | 1        | 2       |
| 99  | 甸柳  | 23    | 3        | 2        | 2    | 2         | 0      | 2     | 32  | 2      | 6        | 6     | 1        | 2       |
| 100 | 甸柳  | 23    | 3        | 2        | 3    | 2         | 0      | 2     | 33  | 2      | 4        | 2     | 1        | 2       |
| 101 | 甸柳  | 23    | 3        | 2        | 3    | 2         | 0      | 2     | 36  | 2      | 10       | 2     | 1        | 2       |
| 102 | 甸柳  | 23    | 3        | 2        | 4    | 1         | 0      | 2     | 40  | 3      | 16       | 1     | 1        | 2       |

| ID  | ORG | ORGID | DISTRICT | province | rank | quotastat | GENDER | MARRI | AGE | agegrp | WORKYEAR | post2 | FULLTIME | mngment |
|-----|-----|-------|----------|----------|------|-----------|--------|-------|-----|--------|----------|-------|----------|---------|
| 103 | 甸柳  | 23    | 3        | 2        | 3    | 1         | 0      | 2     | 46  | 3      | 27       | 5     | 1        | 2       |
| 104 | 甸柳  | 23    | 3        | 2        | 3    | 1         | 0      | 2     | 52  | 4      | 32       | 5     | 1        | 2       |
| 105 | 甸柳  | 23    | 3        | 2        | 3    | 2         | 1      | 2     | 37  | 2      | 12       | 2     | 1        | 2       |
| 106 | 甸柳  | 23    | 3        | 2        | 3    | 1         | 1      | 2     | 38  | 2      | 17       | 2     | 1        | 1       |
| 107 | 东风路 | 45    | 5        | 3        | 1    | 2         | 0      | 1     | 20  | 1      | 2        | 6     | 1        | 2       |
| 108 | 东风路 | 45    | 5        | 3        | 2    | 2         | 0      | 1     | 23  | 1      | 4        | 5     | 1        | 2       |
| 109 | 东风路 | 45    | 5        | 3        | 2    | 2         | 0      | 1     | 24  | 1      | 1        | 6     | 2        | 2       |
| 110 | 东风路 | 45    | 5        | 3        | 2    | 1         | 0      | 1     | 25  | 1      | 1        | 6     | 1        | 2       |
| 111 | 东风路 | 45    | 5        | 3        | 2    | 2         | 0      | 1     | 25  | 1      | 4        | 6     | 1        | 1       |
| 112 | 东风路 | 45    | 5        | 3        | 2    | 2         | 0      | 2     | 26  | 1      | 5        | 6     | 2        | 2       |
| 113 | 东风路 | 45    | 5        | 3        | 2    | 2         | 0      | 2     | 26  | 1      | 7        | 5     | 1        | 2       |
| 114 | 东风路 | 45    | 5        | 3        | 2    | 2         | 0      | 2     | 29  | 1      | 5        | 6     | 1        | 2       |
| 115 | 东风路 | 45    | 5        | 3        | 2    | 2         | 0      | 2     | 29  | 1      | 8        | 5     | 1        | 2       |
| 116 | 东风路 | 45    | 5        | 3        | 2    | 2         | 0      | 2     | 29  | 1      | 9        | 5     | 2        | 2       |
| 117 | 东风路 | 45    | 5        | 3        | 2    | 1         | 0      | 2     | 29  | 1      | 10       | 6     | #NULL!   | 2       |
| 118 | 东风路 | 45    | 5        | 3        | 2    | 2         | 0      | 2     | 30  | 2      | 7        | 5     | 1        | 2       |
| 119 | 东风路 | 45    | 5        | 3        | 2    | 2         | 0      | 2     | 30  | 2      | 9        | 5     | 2        | 2       |
| 120 | 东风路 | 45    | 5        | 3        | 3    | 2         | 0      | 2     | 30  | 2      | 9        | 5     | 1        | 2       |
| 121 | 东风路 | 45    | 5        | 3        | 2    | 2         | 0      | 2     | 31  | 2      | 12       | 5     | 2        | 2       |
| 122 | 东风路 | 45    | 5        | 3        | 2    | 2         | 0      | 2     | 33  | 2      | 10       | 5     | 1        | 2       |
| 123 | 东风路 | 45    | 5        | 3        | 2    | 2         | 0      | 2     | 33  | 2      | 12       | 5     | 1        | 2       |
| 124 | 东风路 | 45    | 5        | 3        | 2    | 2         | 0      | 2     | 37  | 2      | 15       | 2     | 1        | 2       |
| 125 | 东风路 | 45    | 5        | 3        | 3    | 2         | 0      | 2     | 37  | 2      | 17       | 4     | 1        | 1       |
| 126 | 东风路 | 45    | 5        | 3        | 3    | 2         | 0      | 2     | 37  | 2      | 19       | 6     | 2        | 2       |
| 127 | 东风路 | 45    | 5        | 3        | 2    | 1         | 0      | 2     | 40  | 3      | 16       | 6     | 1        | 2       |
| 128 | 东风路 | 45    | 5        | 3        | 3    | 2         | 0      | 2     | 57  | 4      | 38       | 5     | 1        | 2       |
| 129 | 东风路 | 45    | 5        | 3        | 2    | 2         | 1      | 1     | 30  | 2      | 8        | 6     | 1        | 2       |
| 130 | 东风路 | 45    | 5        | 3        | 2    | 1         | 1      | 2     | 40  | 3      | 19       | 6     | #NULL!   | 1       |
| 131 | 东岭  | 51    | 5        | 3        | 2    | 1         | 1      | 2     | 38  | 2      | 13       | 3     | 1        | 2       |
| 132 | 斗鸡  | 47    | 5        | 3        | 2    | 1         | 0      | 2     | 36  | 2      | 19       | 6     | #NULL!   | 2       |
| 133 | 斗鸡  | 47    | 5        | 3        | 2    | 1         | 0      | 2     | 39  | 2      | 19       | 6     | #NULL!   | 2       |
| 134 | 斗鸡  | 47    | 5        | 3        | 2    | 1         | 0      | 2     | 42  | 3      | 23       | 2     | 1        | 2       |
| 135 | 斗鸡  | 47    | 5        | 3        | 4    | 1         | 0      | 2     | 47  | 3      | 2        | 3     | 1        | #NULL!  |
| 136 | 敦化路 | 28    | 4        | 2        | 2    | 1         | 0      | 2     | 30  | 2      | 3        | 4     | 1        | 2       |

| ID  | ORG  | ORGID | DISTRICT | province | rank | quotastat | GENDER | MARRI | AGE | agegrp | WORKYEAR | post2 | FULLTIME | mngment |
|-----|------|-------|----------|----------|------|-----------|--------|-------|-----|--------|----------|-------|----------|---------|
| 137 | 敦化路  | 28    | 4        | 2        | 2    | 1         | 0      | 2     | 32  | 2      | 11       | 6     | 1        | 2       |
| 138 | 敦化路  | 28    | 4        | 2        | 2    | 1         | 0      | 2     | 35  | 2      | 10       | 6     | 1        | 2       |
| 139 | 敦化路  | 28    | 4        | 2        | 3    | 1         | 0      | 2     | 40  | 3      | 20       | 5     | 1        | 1       |
| 140 | 敦化路  | 28    | 4        | 2        | 4    | 1         | 0      | 2     | 48  | 3      | 25       | 2     | #NULL!   | 2       |
| 141 | 敦化路  | 28    | 4        | 2        | 3    | 1         | 0      | 2     | 55  | 4      | 36       | 2     | #NULL!   | 2       |
| 142 | 敦化路  | 28    | 4        | 2        | 3    | 2         | 0      | 2     | 61  | 5      | 30       | 1     | 2        | 2       |
| 143 | 敦化路  | 28    | 4        | 2        | 1    | 1         | 1      | 2     | 26  | 1      | 2        | 4     | 1        | 2       |
| 144 | 佛山苑  | 17    | 3        | 2        | 1    | 2         | 0      | 1     | 24  | 1      | 2        | 5     | 1        | 2       |
| 145 | 佛山苑  | 17    | 3        | 2        | 2    | 2         | 0      | 2     | 24  | 1      | 3        | 5     | 1        | 2       |
| 146 | 佛山苑  | 17    | 3        | 2        | 2    | 2         | 0      | 2     | 27  | 1      | 6        | 5     | 1        | 2       |
| 147 | 佛山苑  | 17    | 3        | 2        | 2    | 2         | 0      | 2     | 33  | 2      | 13       | 5     | 1        | 2       |
| 148 | 佛山苑  | 17    | 3        | 2        | 3    | 2         | 0      | 2     | 62  | 5      | 40       | 2     | 2        | 2       |
| 149 | 佛山苑  | 17    | 3        | 2        | 3    | 2         | 1      | 2     | 58  | 4      | 37       | 6     | 1        | 2       |
| 150 | 福彩   | 34    | 4        | 2        | 1    | 2         | 0      | 1     | 23  | 1      | 1        | 5     | 1        | 2       |
| 151 | 福彩   | 34    | 4        | 2        | 2    | 2         | 0      | 1     | 25  | 1      | 4        | 5     | 2        | 2       |
| 152 | 福彩   | 34    | 4        | 2        | 2    | 2         | 0      | 1     | 27  | 1      | 4        | 6     | 1        | 2       |
| 153 | 福彩   | 34    | 4        | 2        | 2    | 2         | 0      | 2     | 31  | 2      | 10       | 6     | 1        | 2       |
| 154 | 福彩   | 34    | 4        | 2        | 2    | 2         | 0      | 2     | 35  | 2      | 11       | 5     | 1        | 2       |
| 155 | 福彩   | 34    | 4        | 2        | 3    | 3         | 0      | 2     | 64  | 5      | 45       | 1     | #NULL!   | 2       |
| 156 | 钢厂   | 49    | 5        | 3        | 2    | 1         | 0      | 2     | 35  | 2      | 13       | 2     | 1        | 2       |
| 157 | 钢厂   | 49    | 5        | 3        | 3    | 1         | 0      | 2     | 43  | 3      | 23       | 5     | 1        | 2       |
| 158 | 钢厂   | 49    | 5        | 3        | 2    | 1         | 1      | 2     | 39  | 2      | 14       | 2     | 1        | 2       |
| 159 | 钢厂   | 49    | 5        | 3        | 4    | 1         | 1      | 2     | 52  | 4      | 29       | 1     | 1        | 1       |
| 160 | 高河梗  | 8     | 1        | 1        | 2    | 2         | 0      | 1     | 18  | 1      | 2        | 5     | 1        | 2       |
| 161 | 高河梗  | 8     | 1        | 1        | 2    | 2         | 0      | 2     | 48  | 3      | 20       | 1     | 1        | 2       |
| 162 | 高河梗  | 8     | 1        | 1        | 2    | 2         | 1      | 2     | 32  | 2      | 6        | 3     | 1        | 2       |
| 163 | 高河梗  | 8     | 1        | 1        | 2    | 2         | 1      | 2     | 35  | 2      | 12       | 2     | 1        | 1       |
| 164 | 高河梗  | 8     | 1        | 1        | 4    | 2         | 1      | 2     | 71  | 5      | 46       | 3     | 2        | 1       |
| 165 | 古城   | 9     | 1        | 1        | 2    | 2         | 0      | 1     | 22  | 1      | 2        | 5     | 1        | 2       |
| 166 | 古城   | 9     | 1        | 1        | 2    | 2         | 0      | 2     | 28  | 1      | 6        | 5     | 1        | 2       |
| 167 | 古城   | 9     | 1        | 1        | 2    | 2         | 1      | 2     | 30  | 2      | 5        | 3     | 1        | 2       |
| 168 | 古城   | 9     | 1        | 1        | 2    | 2         | 1      | 2     | 30  | 2      | 7        | 6     | 1        | 2       |
| 169 | 古城   | 9     | 1        | 1        | 2    | 2         | 1      | 2     | 38  | 2      | 11       | 2     | 1        | 1       |
| 170 | 海尔绿城 | 24    | 3        | 2        | 1    | 2         | 0      | 2     | 29  | 1      | 7        | 5     | #NULL!   | 2       |

| ID  | ORG  | ORGID | DISTRICT | province | rank | quotastat | GENDER | MARRI | AGE | agegrp | WORKYEAR | post2 | FULLTIME | mngment |
|-----|------|-------|----------|----------|------|-----------|--------|-------|-----|--------|----------|-------|----------|---------|
| 171 | 海尔绿城 | 24    | 3        | 2        | 2    | 2         | 1      | 2     | 35  | 2      | 11       | 2     | 1        | 2       |
| 172 | 海尔绿城 | 24    | 3        | 2        | 3    | 2         | 1      | 2     | 70  | 5      | 48       | 3     | #NULL!   | 2       |
| 173 | 海棠街道 | 4     | 1        | 1        | 2    | 2         | 0      | 1     | 19  | 1      | 3        | 6     | 1        | 2       |
| 174 | 海棠街道 | 4     | 1        | 1        | 2    | 2         | 0      | 1     | 20  | 1      | 0        | 5     | 1        | 2       |
| 175 | 海棠街道 | 4     | 1        | 1        | 2    | 2         | 0      | 1     | 20  | 1      | 2        | 5     | 2        | 2       |
| 176 | 海棠街道 | 4     | 1        | 1        | 1    | 2         | 0      | 1     | 21  | 1      | 1        | 6     | #NULL!   | 2       |
| 177 | 海棠街道 | 4     | 1        | 1        | 2    | 2         | 0      | 1     | 22  | 1      | 1        | 6     | 1        | 2       |
| 178 | 海棠街道 | 4     | 1        | 1        | 2    | 2         | 0      | 2     | 23  | 1      | 1        | 5     | 1        | 1       |
| 179 | 海棠街道 | 4     | 1        | 1        | 2    | 2         | 0      | 1     | 23  | 1      | 1        | 6     | 1        | 1       |
| 180 | 海棠街道 | 4     | 1        | 1        | 1    | 2         | 0      | 2     | 23  | 1      | 3        | 5     | 1        | 2       |
| 181 | 海棠街道 | 4     | 1        | 1        | 2    | 2         | 0      | 1     | 24  | 1      | 5        | 5     | #NULL!   | 2       |
| 182 | 海棠街道 | 4     | 1        | 1        | 2    | 2         | 0      | 2     | 26  | 1      | 4        | 5     | 1        | 2       |
| 183 | 海棠街道 | 4     | 1        | 1        | 2    | 2         | 0      | 2     | 28  | 1      | 7        | 5     | 1        | 2       |
| 184 | 海棠街道 | 4     | 1        | 1        | 2    | 1         | 0      | 2     | 30  | 2      | 10       | 6     | 1        | 2       |
| 185 | 海棠街道 | 4     | 1        | 1        | 2    | 2         | 0      | 2     | 31  | 2      | 7        | 5     | 2        | 1       |
| 186 | 海棠街道 | 4     | 1        | 1        | 1    | 2         | 0      | 2     | 33  | 2      | 11       | 1     | 1        | 1       |
| 187 | 海棠街道 | 4     | 1        | 1        | 2    | 2         | 0      | 2     | 44  | 3      | 20       | 6     | 1        | 2       |
| 188 | 海棠街道 | 4     | 1        | 1        | 2    | 2         | 1      | 1     | 27  | 1      | 4        | 1     | 1        | 2       |
| 189 | 海棠街道 | 4     | 1        | 1        | 2    | 1         | 1      | 1     | 30  | 2      | 10       | 2     | 1        | 2       |
| 190 | 海棠街道 | 4     | 1        | 1        | 3    | 3         | 1      | 2     | 66  | 5      | 45       | 6     | #NULL!   | #NULL!  |
| 191 | 即墨路  | 29    | 4        | 2        | 2    | 2         | 0      | 1     | 25  | 1      | 7        | 6     | 1        | 2       |
| 192 | 即墨路  | 29    | 4        | 2        | 2    | 2         | 0      | 1     | 26  | 1      | 7        | 6     | 1        | 2       |
| 193 | 即墨路  | 29    | 4        | 2        | 2    | 2         | 0      | 1     | 27  | 1      | 7        | 5     | 1        | 2       |
| 194 | 即墨路  | 29    | 4        | 2        | 1    | 2         | 0      | 2     | 30  | 2      | 5        | 1     | 1        | 2       |
| 195 | 即墨路  | 29    | 4        | 2        | 2    | 1         | 0      | 2     | 31  | 2      | 2        | 3     | 1        | 2       |
| 196 | 即墨路  | 29    | 4        | 2        | 2    | 1         | 0      | 2     | 32  | 2      | 14       | 5     | 1        | 2       |
| 197 | 即墨路  | 29    | 4        | 2        | 3    | 1         | 0      | 2     | 33  | 2      | 13       | 6     | 1        | 2       |
| 198 | 即墨路  | 29    | 4        | 2        | 3    | 1         | 0      | 2     | 40  | 3      | 21       | 5     | 1        | 2       |
| 199 | 即墨路  | 29    | 4        | 2        | 1    | 1         | 0      | 2     | 49  | 3      | 26       | 6     | 1        | 2       |
| 200 | 即墨路  | 29    | 4        | 2        | 3    | 1         | 1      | 2     | 40  | 3      | 17       | 3     | 1        | 2       |
| 201 | 健民   | 30    | 4        | 2        | 1    | 2         | 0      | 1     | 22  | 1      | 1        | 1     | 1        | 2       |
| 202 | 健民   | 30    | 4        | 2        | 2    | 2         | 0      | 1     | 22  | 1      | 1        | 6     | 2        | 2       |
| 203 | 健民   | 30    | 4        | 2        | 2    | 2         | 0      | 1     | 22  | 1      | 2        | 6     | 2        | 2       |
| 204 | 健民   | 30    | 4        | 2        | 2    | 2         | 0      | 2     | 27  | 1      | 3        | 6     | 1        | 2       |

| ID  | ORG  | ORGID | DISTRICT | province | rank | quotastat | GENDER | MARRI | AGE | agegrp | WORKYEAR | post2 | FULLTIME | mngment |
|-----|------|-------|----------|----------|------|-----------|--------|-------|-----|--------|----------|-------|----------|---------|
| 205 | 健民   | 30    | 4        | 2        | 2    | 1         | 0      | 2     | 27  | 1      | 4        | 5     | 1        | 1       |
| 206 | 健民   | 30    | 4        | 2        | 4    | 3         | 0      | 2     | 60  | 5      | 30       | 2     | #NULL!   | 2       |
| 207 | 健民   | 30    | 4        | 2        | 1    | 2         | 1      | 1     | 26  | 1      | 2        | 1     | 1        | 2       |
| 208 | 健民   | 30    | 4        | 2        | 2    | 2         | 1      | 1     | 26  | 1      | 2        | 2     | 1        | 2       |
| 209 | 交口   | 57    | 6        | 3        | 1    | 2         | 0      | 1     | 23  | 1      | 1        | 5     | 2        | 2       |
| 210 | 交口   | 57    | 6        | 3        | 2    | 2         | 0      | 1     | 23  | 1      | 1        | 5     | 2        | 2       |
| 211 | 交口   | 57    | 6        | 3        | 1    | 1         | 0      | 1     | 23  | 1      | 1        | 6     | 1        | 2       |
| 212 | 交口   | 57    | 6        | 3        | 2    | 2         | 0      | 2     | 27  | 1      | 6        | 1     | 2        | 2       |
| 213 | 交口   | 57    | 6        | 3        | 3    | 2         | 0      | 2     | 32  | 2      | 7        | 1     | 1        | 2       |
| 214 | 交口   | 57    | 6        | 3        | 2    | 2         | 0      | 2     | 43  | 3      | 26       | 5     | #NULL!   | 2       |
| 215 | 交口   | 57    | 6        | 3        | 1    | 1         | 1      | 1     | 25  | 1      | 2        | 6     | 1        | 2       |
| 216 | 交口   | 57    | 6        | 3        | 2    | 1         | 1      | 2     | 28  | 1      | 3        | 2     | 1        | 2       |
| 217 | 交口   | 57    | 6        | 3        | 3    | 1         | 1      | 2     | 54  | 4      | 33       | 6     | 1        | 2       |
| 218 | 骊山第一 | 58    | 6        | 3        | 2    | 1         | 0      | 2     | 31  | 2      | 10       | 5     | 1        | 2       |
| 219 | 骊山第一 | 58    | 6        | 3        | 1    | 1         | 0      | 2     | 33  | 2      | 10       | 5     | 1        | 2       |
| 220 | 骊山第一 | 58    | 6        | 3        | 1    | 1         | 0      | 2     | 35  | 2      | 13       | 6     | #NULL!   | #NULL!  |
| 221 | 骊山第一 | 58    | 6        | 3        | 2    | 1         | 0      | 2     | 36  | 2      | 15       | 5     | 1        | 2       |
| 222 | 骊山第一 | 58    | 6        | 3        | 3    | 1         | 0      | 2     | 38  | 2      | 15       | 2     | 1        | 1       |
| 223 | 骊山第一 | 58    | 6        | 3        | 2    | 1         | 0      | 2     | 41  | 3      | 13       | 2     | 1        | 2       |
| 224 | 骊山第一 | 58    | 6        | 3        | 2    | 1         | 0      | 2     | 41  | 3      | 23       | 2     | 1        | 2       |
| 225 | 骊山第一 | 58    | 6        | 3        | 2    | 1         | 1      | 2     | 34  | 2      | 10       | 2     | 1        | 1       |
| 226 | 骊山第一 | 58    | 6        | 3        | 2    | 1         | 1      | 2     | 46  | 3      | 23       | 2     | 1        | 2       |
| 227 | 辽宁路  | 37    | 4        | 2        | 2    | 2         | 0      | 1     | 24  | 1      | 2        | 5     | 1        | 2       |
| 228 | 辽宁路  | 37    | 4        | 2        | 2    | 1         | 0      | 2     | 26  | 1      | 3        | 5     | 1        | 2       |
| 229 | 辽宁路  | 37    | 4        | 2        | 2    | 2         | 0      | 1     | 26  | 1      | 3        | 5     | 1        | 2       |
| 230 | 辽宁路  | 37    | 4        | 2        | 2    | 1         | 0      | 1     | 26  | 1      | 3        | 6     | 1        | 2       |
| 231 | 辽宁路  | 37    | 4        | 2        | 2    | 1         | 0      | 2     | 29  | 1      | 3        | 2     | 1        | 2       |
| 232 | 辽宁路  | 37    | 4        | 2        | 2    | 2         | 0      | 2     | 31  | 2      | 10       | 6     | 1        | 2       |
| 233 | 辽宁路  | 37    | 4        | 2        | 3    | 1         | 0      | 2     | 42  | 3      | 20       | 5     | 1        | 1       |
| 234 | 辽宁路  | 37    | 4        | 2        | 3    | 1         | 0      | 2     | 42  | 3      | 21       | 5     | 1        | 1       |
| 235 | 菱湖   | 11    | 2        | 1        | 2    | 2         | 0      | 1     | 23  | 1      | 4        | 5     | 1        | 2       |
| 236 | 菱湖   | 11    | 2        | 1        | 1    | 2         | 0      | 1     | 25  | 1      | 1        | 2     | 1        | 2       |
| 237 | 菱湖   | 11    | 2        | 1        | 2    | 2         | 0      | 2     | 25  | 1      | 3        | 6     | 1        | 2       |
| 238 | 菱湖   | 11    | 2        | 1        | 1    | 2         | 0      | 1     | 26  | 1      | 1        | 1     | 1        | 2       |

| ID  | ORG  | ORGID | DISTRICT | province | rank | quotastat | GENDER | MARRI | AGE | agegrp | WORKYEAR | post2 | FULLTIME | mngment |
|-----|------|-------|----------|----------|------|-----------|--------|-------|-----|--------|----------|-------|----------|---------|
| 239 | 菱湖   | 11    | 2        | 1        | 2    | 2         | 0      | 2     | 30  | 2      | 10       | 5     | 1        | 2       |
| 240 | 菱湖   | 11    | 2        | 1        | 2    | 2         | 0      | 2     | 31  | 2      | 6        | 2     | 1        | 2       |
| 241 | 菱湖   | 11    | 2        | 1        | 2    | 1         | 0      | 2     | 32  | 2      | 10       | 5     | 1        | 2       |
| 242 | 菱湖   | 11    | 2        | 1        | 2    | 1         | 0      | 2     | 33  | 2      | 14       | 2     | 1        | 2       |
| 243 | 菱湖   | 11    | 2        | 1        | 2    | 2         | 0      | 2     | 41  | 3      | 23       | 5     | 2        | 2       |
| 244 | 菱湖   | 11    | 2        | 1        | 3    | 1         | 0      | 2     | 44  | 3      | 21       | 6     | 1        | 1       |
| 245 | 菱湖   | 11    | 2        | 1        | 1    | 2         | 1      | 1     | 26  | 1      | 1        | 2     | 2        | 2       |
| 246 | 菱湖   | 11    | 2        | 1        | 2    | 1         | 1      | 2     | 28  | 1      | 6        | 2     | 1        | 1       |
| 247 | 菱湖   | 11    | 2        | 1        | 3    | 2         | 1      | 1     | 29  | 1      | 5        | 1     | 1        | 2       |
| 248 | 菱湖   | 11    | 2        | 1        | 1    | 2         | 1      | 2     | 37  | 2      | 7        | 1     | 2        | 2       |
| 249 | 和平   | 31    | 4        | 2        | 2    | 2         | 0      | 1     | 22  | 1      | 1        | 6     | 1        | 2       |
| 250 | 和平   | 31    | 4        | 2        | 1    | 2         | 0      | 1     | 23  | 1      | 1        | 1     | 1        | 2       |
| 251 | 和平   | 31    | 4        | 2        | 3    | 1         | 0      | 2     | 43  | 3      | 21       | 5     | 1        | 2       |
| 252 | 和平   | 31    | 4        | 2        | 3    | 2         | 0      | 2     | 46  | 3      | 21       | 5     | 1        | 2       |
| 253 | 和平   | 31    | 4        | 2        | 3    | 2         | 0      | 2     | 58  | 4      | 38       | 6     | 1        | 2       |
| 254 | 和平   | 31    | 4        | 2        | 3    | 2         | 0      | 2     | 64  | 5      | 38       | 1     | 2        | 2       |
| 255 | 和平   | 31    | 4        | 2        | 3    | 2         | 1      | 2     | 38  | 2      | 18       | 2     | 1        | 1       |
| 256 | 彭浦新村 | 61    | 7        | 4        | 2    | 2         | 0      | 1     | 20  | 1      | 1        | 5     | 1        | 2       |
| 257 | 彭浦新村 | 61    | 7        | 4        | 1    | 2         | 0      | 1     | 20  | 1      | 1        | 6     | 2        | 2       |
| 258 | 彭浦新村 | 61    | 7        | 4        | 2    | 2         | 0      | 2     | 24  | 1      | 3        | 5     | 1        | 2       |
| 259 | 彭浦新村 | 61    | 7        | 4        | 2    | 2         | 0      | 1     | 24  | 1      | 3        | 5     | 1        | 2       |
| 260 | 彭浦新村 | 61    | 7        | 4        | 1    | 1         | 0      | 2     | 26  | 1      | 1        | 4     | 2        | 2       |
| 261 | 彭浦新村 | 61    | 7        | 4        | 2    | 1         | 0      | 2     | 26  | 1      | 5        | 4     | 1        | 2       |
| 262 | 彭浦新村 | 61    | 7        | 4        | 2    | 1         | 0      | 1     | 30  | 2      | 10       | 5     | 1        | 2       |
| 263 | 彭浦新村 | 61    | 7        | 4        | 2    | 2         | 0      | 2     | 31  | 2      | 8        | 4     | 1        | 2       |
| 264 | 彭浦新村 | 61    | 7        | 4        | 2    | 1         | 0      | 2     | 32  | 2      | 11       | 5     | 1        | 2       |
| 265 | 彭浦新村 | 61    | 7        | 4        | 2    | 1         | 0      | 1     | 32  | 2      | 12       | 5     | 1        | 2       |
| 266 | 彭浦新村 | 61    | 7        | 4        | 2    | 1         | 0      | 2     | 33  | 2      | 12       | 5     | 2        | 2       |
| 267 | 彭浦新村 | 61    | 7        | 4        | 3    | 1         | 0      | 2     | 34  | 2      | 12       | 2     | 1        | 2       |
| 268 | 彭浦新村 | 61    | 7        | 4        | 3    | 1         | 0      | 2     | 34  | 2      | 15       | 5     | 1        | 2       |
| 269 | 彭浦新村 | 61    | 7        | 4        | 3    | 1         | 0      | 2     | 35  | 2      | 13       | 2     | 1        | 2       |
| 270 | 彭浦新村 | 61    | 7        | 4        | 3    | 1         | 0      | 2     | 35  | 2      | 13       | 2     | 1        | 2       |
| 271 | 彭浦新村 | 61    | 7        | 4        | 2    | 1         | 0      | 2     | 35  | 2      | 15       | 4     | 1        | 2       |
| 272 | 彭浦新村 | 61    | 7        | 4        | 3    | 1         | 0      | 1     | 36  | 2      | 16       | 6     | 1        | 2       |



| ID  | ORG  | ORGID | DISTRICT | province | rank | quotastat | GENDER | MARRI | AGE | agegrp | WORKYEAR | post2 | FULLTIME | mngment |
|-----|------|-------|----------|----------|------|-----------|--------|-------|-----|--------|----------|-------|----------|---------|
| 273 | 彭浦新村 | 61    | 7        | 4        | 3    | 1         | 0      | 2     | 36  | 2      | 17       | 5     | 1        | 2       |
| 274 | 彭浦新村 | 61    | 7        | 4        | 3    | 1         | 0      | 2     | 37  | 2      | 10       | 2     | 1        | 2       |
| 275 | 彭浦新村 | 61    | 7        | 4        | 3    | 1         | 0      | 2     | 37  | 2      | 11       | 2     | 1        | 2       |
| 276 | 彭浦新村 | 61    | 7        | 4        | 3    | 1         | 0      | 2     | 37  | 2      | 13       | 2     | 1        | 2       |
| 277 | 彭浦新村 | 61    | 7        | 4        | 3    | 1         | 0      | 2     | 37  | 2      | 13       | 2     | 1        | 2       |
| 278 | 彭浦新村 | 61    | 7        | 4        | 2    | 1         | 0      | 2     | 37  | 2      | 18       | 2     | 1        | 2       |
| 279 | 彭浦新村 | 61    | 7        | 4        | 3    | 1         | 0      | 2     | 37  | 2      | 18       | 5     | 1        | 2       |
| 280 | 彭浦新村 | 61    | 7        | 4        | 2    | 1         | 0      | 2     | 38  | 2      | 19       | 5     | 1        | 2       |
| 281 | 彭浦新村 | 61    | 7        | 4        | 3    | 1         | 0      | 2     | 40  | 3      | 19       | 5     | 1        | 2       |
| 282 | 彭浦新村 | 61    | 7        | 4        | 3    | 1         | 0      | 2     | 40  | 3      | 21       | 5     | 1        | 2       |
| 283 | 彭浦新村 | 61    | 7        | 4        | 3    | 1         | 0      | 2     | 41  | 3      | 14       | 2     | 1        | 2       |
| 284 | 彭浦新村 | 61    | 7        | 4        | 3    | 1         | 0      | 2     | 41  | 3      | 22       | 5     | 1        | 2       |
| 285 | 彭浦新村 | 61    | 7        | 4        | 3    | 1         | 0      | 2     | 41  | 3      | 22       | 5     | 1        | 2       |
| 286 | 彭浦新村 | 61    | 7        | 4        | 2    | 1         | 0      | 2     | 41  | 3      | 23       | 5     | 1        | 2       |
| 287 | 彭浦新村 | 61    | 7        | 4        | 3    | 1         | 0      | 2     | 42  | 3      | 23       | 5     | 1        | 2       |
| 288 | 彭浦新村 | 61    | 7        | 4        | 1    | 1         | 0      | 2     | 42  | 3      | 23       | 5     | 1        | 2       |
| 289 | 彭浦新村 | 61    | 7        | 4        | 2    | 1         | 0      | 1     | 42  | 3      | 24       | 5     | 1        | 2       |
| 290 | 彭浦新村 | 61    | 7        | 4        | 3    | 1         | 0      | 2     | 43  | 3      | 23       | 2     | 1        | 2       |
| 291 | 彭浦新村 | 61    | 7        | 4        | 1    | 1         | 0      | 2     | 43  | 3      | 23       | 5     | 1        | 2       |
| 292 | 彭浦新村 | 61    | 7        | 4        | 3    | 1         | 0      | 2     | 43  | 3      | 23       | 5     | 1        | 2       |
| 293 | 彭浦新村 | 61    | 7        | 4        | 3    | 1         | 0      | 2     | 43  | 3      | 23       | 5     | 1        | 2       |
| 294 | 彭浦新村 | 61    | 7        | 4        | 3    | 1         | 0      | 2     | 43  | 3      | 24       | 2     | 1        | 2       |
| 295 | 彭浦新村 | 61    | 7        | 4        | 2    | 1         | 0      | 2     | 45  | 3      | 26       | 5     | 1        | 2       |
| 296 | 彭浦新村 | 61    | 7        | 4        | 3    | 1         | 0      | 2     | 46  | 3      | 27       | 5     | 1        | 2       |
| 297 | 彭浦新村 | 61    | 7        | 4        | 3    | 1         | 0      | 2     | 47  | 3      | 23       | 2     | 1        | 2       |
| 298 | 彭浦新村 | 61    | 7        | 4        | 3    | 1         | 0      | 2     | 47  | 3      | 28       | 5     | 1        | 2       |
| 299 | 彭浦新村 | 61    | 7        | 4        | 3    | 1         | 0      | 2     | 48  | 3      | 25       | 2     | 1        | 1       |
| 300 | 彭浦新村 | 61    | 7        | 4        | 3    | 1         | 0      | 2     | 49  | 3      | 23       | 2     | 1        | 2       |
| 301 | 彭浦新村 | 61    | 7        | 4        | 3    | 2         | 0      | 2     | 50  | 4      | 30       | 2     | 1        | 2       |
| 302 | 彭浦新村 | 61    | 7        | 4        | 2    | 2         | 1      | 2     | 33  | 2      | 7        | 2     | 1        | 2       |
| 303 | 彭浦新村 | 61    | 7        | 4        | 3    | 1         | 1      | 2     | 35  | 2      | 12       | 2     | 1        | 1       |
| 304 | 彭浦新村 | 61    | 7        | 4        | 3    | 1         | 1      | 2     | 36  | 2      | 13       | 2     | 1        | 2       |
| 305 | 彭浦新村 | 61    | 7        | 4        | 3    | 1         | 1      | 2     | 38  | 2      | 16       | 2     | 1        | 1       |
| 306 | 彭浦新村 | 61    | 7        | 4        | 3    | 1         | 1      | 2     | 41  | 3      | 12       | 2     | 1        | 2       |

| ID  | ORG  | ORGID | DISTRICT | province | rank | quotastat | GENDER | MARRI | AGE | agegrp | WORKYEAR | post2 | FULLTIME | mngment |
|-----|------|-------|----------|----------|------|-----------|--------|-------|-----|--------|----------|-------|----------|---------|
| 307 | 彭浦新村 | 61    | 7        | 4        | 3    | 1         | 1      | 2     | 44  | 3      | 23       | 2     | 1        | 2       |
| 308 | 彭浦新村 | 61    | 7        | 4        | 3    | 1         | 1      | 2     | 56  | 4      | 37       | 2     | 1        | 2       |
| 309 | 彭浦镇  | 59    | 7        | 4        | 2    | 1         | 0      | 1     | 25  | 1      | 2        | 4     | 1        | 2       |
| 310 | 彭浦镇  | 59    | 7        | 4        | 2    | 2         | 0      | 2     | 26  | 1      | 2        | 5     | 1        | 2       |
| 311 | 彭浦镇  | 59    | 7        | 4        | 2    | 2         | 0      | 2     | 30  | 2      | 3        | 2     | 1        | 2       |
| 312 | 彭浦镇  | 59    | 7        | 4        | 2    | 1         | 0      | 2     | 30  | 2      | 7        | 5     | 1        | 2       |
| 313 | 彭浦镇  | 59    | 7        | 4        | 3    | 1         | 0      | 2     | 31  | 2      | 9        | 4     | 1        | 2       |
| 314 | 彭浦镇  | 59    | 7        | 4        | 3    | 1         | 0      | 2     | 33  | 2      | 9        | 2     | 1        | 2       |
| 315 | 彭浦镇  | 59    | 7        | 4        | 2    | 2         | 0      | 2     | 33  | 2      | 12       | 4     | 1        | 2       |
| 316 | 彭浦镇  | 59    | 7        | 4        | 3    | 1         | 0      | 2     | 35  | 2      | 14       | 4     | 1        | 2       |
| 317 | 彭浦镇  | 59    | 7        | 4        | 3    | 1         | 0      | 2     | 35  | 2      | 14       | 4     | 1        | 2       |
| 318 | 彭浦镇  | 59    | 7        | 4        | 2    | 1         | 0      | 2     | 35  | 2      | 14       | 5     | 1        | 2       |
| 319 | 彭浦镇  | 59    | 7        | 4        | 3    | 1         | 0      | 2     | 35  | 2      | 15       | 4     | 1        | 2       |
| 320 | 彭浦镇  | 59    | 7        | 4        | 3    | 1         | 0      | 2     | 35  | 2      | 16       | 5     | 1        | 2       |
| 321 | 彭浦镇  | 59    | 7        | 4        | 3    | 1         | 0      | 2     | 36  | 2      | 17       | 4     | 1        | 1       |
| 322 | 彭浦镇  | 59    | 7        | 4        | 3    | 1         | 0      | 2     | 40  | 3      | 18       | 5     | 1        | 2       |
| 323 | 彭浦镇  | 59    | 7        | 4        | 3    | 1         | 0      | 2     | 40  | 3      | 21       | 5     | 2        | 2       |
| 324 | 彭浦镇  | 59    | 7        | 4        | 3    | 1         | 0      | 2     | 42  | 3      | 11       | 2     | 1        | 2       |
| 325 | 彭浦镇  | 59    | 7        | 4        | 2    | 1         | 0      | 2     | 42  | 3      | 18       | 5     | 1        | 2       |
| 326 | 彭浦镇  | 59    | 7        | 4        | 1    | 2         | 0      | 2     | 43  | 3      | 7        | 4     | 1        | 1       |
| 327 | 彭浦镇  | 59    | 7        | 4        | 4    | 2         | 0      | 2     | 43  | 3      | 18       | 2     | 1        | 2       |
| 328 | 彭浦镇  | 59    | 7        | 4        | 3    | 1         | 0      | 2     | 43  | 3      | 22       | 2     | 1        | 2       |
| 329 | 彭浦镇  | 59    | 7        | 4        | 3    | 2         | 0      | 2     | 49  | 3      | 20       | 2     | #NULL!   | 2       |
| 330 | 彭浦镇  | 59    | 7        | 4        | 3    | 1         | 1      | 2     | 28  | 1      | 5        | 2     | 1        | 2       |
| 331 | 彭浦镇  | 59    | 7        | 4        | 3    | 2         | 1      | 2     | 30  | 2      | 2        | 2     | 1        | 2       |
| 332 | 彭浦镇  | 59    | 7        | 4        | 2    | 1         | 1      | 2     | 31  | 2      | 9        | 4     | 1        | 2       |
| 333 | 彭浦镇  | 59    | 7        | 4        | 1    | 1         | 1      | 2     | 32  | 2      | 8        | 4     | 1        | 2       |
| 334 | 彭浦镇  | 59    | 7        | 4        | 3    | 1         | 1      | 2     | 37  | 2      | 17       | 2     | 1        | #NULL!  |
| 335 | 棋盘   | 16    | 3        | 2        | 2    | 2         | 0      | 1     | 26  | 1      | 6        | 5     | #NULL!   | 2       |
| 336 | 棋盘   | 16    | 3        | 2        | 2    | 2         | 0      | 2     | 34  | 2      | 12       | 4     | 1        | 2       |
| 337 | 棋盘   | 16    | 3        | 2        | 2    | 1         | 0      | 2     | 41  | 3      | 26       | 5     | 1        | 2       |
| 338 | 棋盘   | 16    | 3        | 2        | 3    | 1         | 0      | 2     | 45  | 3      | 20       | 5     | 1        | 2       |
| 339 | 棋盘   | 16    | 3        | 2        | 2    | 2         | 1      | 2     | 36  | 2      | 11       | 2     | 1        | 2       |
| 340 | 千佛山办 | 22    | 3        | 2        | 2    | 1         | 0      | 1     | 25  | 1      | 1        | 2     | 1        | 2       |

| ID  | ORG  | ORGID | DISTRICT | province | rank | quotastat | GENDER | MARRI | AGE | agegrp | WORKYEAR | post2 | FULLTIME | mngment |
|-----|------|-------|----------|----------|------|-----------|--------|-------|-----|--------|----------|-------|----------|---------|
| 341 | 千佛山办 | 22    | 3        | 2        | 1    | 1         | 0      | 2     | 26  | 1      | 1        | 6     | 1        | 2       |
| 342 | 千佛山办 | 22    | 3        | 2        | 1    | 2         | 0      | 2     | 27  | 1      | 4        | 5     | 1        | 2       |
| 343 | 千佛山办 | 22    | 3        | 2        | 2    | 1         | 0      | 2     | 28  | 1      | 4        | 6     | 1        | 2       |
| 344 | 千佛山办 | 22    | 3        | 2        | 3    | 1         | 0      | 2     | 35  | 2      | 10       | 2     | 1        | 2       |
| 345 | 千佛山办 | 22    | 3        | 2        | 2    | 1         | 0      | 2     | 38  | 2      | 5        | 4     | 1        | 2       |
| 346 | 千佛山办 | 22    | 3        | 2        | 2    | 1         | 0      | 2     | 38  | 2      | 16       | 6     | 1        | 2       |
| 347 | 千佛山办 | 22    | 3        | 2        | 3    | 1         | 0      | 2     | 39  | 2      | 18       | 5     | 1        | 2       |
| 348 | 千佛山办 | 22    | 3        | 2        | 3    | 1         | 0      | 2     | 40  | 3      | 20       | 5     | 1        | 2       |
| 349 | 千佛山办 | 22    | 3        | 2        | 3    | 1         | 0      | 2     | 40  | 3      | 21       | 2     | 1        | 2       |
| 350 | 千佛山办 | 22    | 3        | 2        | 3    | 1         | 0      | 2     | 43  | 3      | 25       | 5     | 1        | 2       |
| 351 | 千佛山办 | 22    | 3        | 2        | 3    | 1         | 0      | 2     | 48  | 3      | 30       | 5     | 1        | 2       |
| 352 | 千佛山办 | 22    | 3        | 2        | 4    | 1         | 0      | 2     | 50  | 4      | 24       | 2     | 1        | 2       |
| 353 | 千佛山办 | 22    | 3        | 2        | 4    | 2         | 1      | 2     | 60  | 5      | 40       | 2     | 2        | 1       |
| 354 | 青后   | 19    | 3        | 2        | 2    | 2         | 0      | 1     | 25  | 1      | 1        | 4     | 1        | 2       |
| 355 | 青后   | 19    | 3        | 2        | 2    | 1         | 0      | 2     | 38  | 2      | 18       | 6     | 1        | 2       |
| 356 | 青后   | 19    | 3        | 2        | 3    | 1         | 0      | 2     | 48  | 3      | 29       | 5     | 1        | 2       |
| 357 | 青后   | 19    | 3        | 2        | 3    | 1         | 0      | 2     | 50  | 4      | 32       | 5     | 1        | 2       |
| 358 | 青后   | 19    | 3        | 2        | 2    | 1         | 1      | 2     | 50  | 4      | 30       | 6     | #NULL!   | 2       |
| 359 | 青后   | 19    | 3        | 2        | 3    | 1         | 1      | 2     | 50  | 4      | 31       | 6     | 1        | 2       |
| 360 | 盛福中心 | 18    | 3        | 2        | 2    | 2         | 0      | 1     | 21  | 1      | 1        | 5     | 1        | 2       |
| 361 | 盛福中心 | 18    | 3        | 2        | 2    | 2         | 0      | 1     | 25  | 1      | 5        | 5     | 1        | 2       |
| 362 | 盛福中心 | 18    | 3        | 2        | 2    | 2         | 0      | 2     | 28  | 1      | 7        | 5     | 1        | 2       |
| 363 | 盛福中心 | 18    | 3        | 2        | 2    | 2         | 0      | 2     | 29  | 1      | 6        | 5     | 1        | 2       |
| 364 | 盛福中心 | 18    | 3        | 2        | 2    | 2         | 0      | 2     | 30  | 2      | 6        | 5     | 1        | 2       |
| 365 | 盛福中心 | 18    | 3        | 2        | 3    | 1         | 0      | 2     | 40  | 3      | 20       | 5     | 1        | 2       |
| 366 | 盛福中心 | 18    | 3        | 2        | 3    | 1         | 0      | 2     | 50  | 4      | 31       | 2     | 1        | 2       |
| 367 | 盛福中心 | 18    | 3        | 2        | 3    | 2         | 0      | 2     | 57  | 4      | 30       | 2     | 2        | 2       |
| 368 | 盛福中心 | 18    | 3        | 2        | 1    | 2         | 1      | 1     | 23  | 1      | 2        | 6     | 2        | 2       |
| 369 | 盛福中心 | 18    | 3        | 2        | 3    | 1         | 1      | 2     | 35  | 2      | 15       | 6     | 1        | 2       |
| 370 | 师东新村 | 25    | 3        | 2        | 2    | 2         | 0      | 1     | 24  | 1      | 1        | 5     | 1        | 2       |
| 371 | 师东新村 | 25    | 3        | 2        | 2    | 1         | 0      | 1     | 27  | 1      | 5        | 5     | 1        | 2       |
| 372 | 师东新村 | 25    | 3        | 2        | 1    | 2         | 0      | 1     | 29  | 1      | 4        | 5     | 1        | 2       |
| 373 | 师东新村 | 25    | 3        | 2        | 3    | 2         | 0      | 2     | 34  | 2      | 9        | 1     | 1        | 2       |
| 374 | 师东新村 | 25    | 3        | 2        | 1    | 1         | 0      | 2     | 48  | 3      | 3        | 6     | 1        | 1       |

| ID  | ORG  | ORGID | DISTRICT | province | rank | quotastat | GENDER | MARRI | AGE | agegrp | WORKYEAR | post2 | FULLTIME | mngment |
|-----|------|-------|----------|----------|------|-----------|--------|-------|-----|--------|----------|-------|----------|---------|
| 375 | 师东新村 | 25    | 3        | 2        | 3    | 1         | 1      | 2     | 41  | 3      | 15       | 2     | 1        | 1       |
| 376 | 师东新村 | 25    | 3        | 2        | 1    | 1         | 1      | 2     | 44  | 3      | 3        | 6     | 1        | 1       |
| 377 | 师东新村 | 25    | 3        | 2        | 3    | 1         | 1      | 2     | 56  | 4      | 30       | 2     | 1        | 2       |
| 378 | 十亩园  | 20    | 3        | 2        | 2    | 2         | 0      | 1     | 26  | 1      | 1        | 3     | 1        | 2       |
| 379 | 十亩园  | 20    | 3        | 2        | 2    | 2         | 0      | 2     | 32  | 2      | 6        | 3     | 1        | 2       |
| 380 | 十亩园  | 20    | 3        | 2        | 1    | 1         | 0      | 2     | 35  | 2      | 11       | 6     | #NULL!   | 1       |
| 381 | 十亩园  | 20    | 3        | 2        | 3    | 1         | 0      | 2     | 41  | 3      | 20       | 5     | 1        | 1       |
| 382 | 十亩园  | 20    | 3        | 2        | 2    | 1         | 0      | 2     | 52  | 4      | 36       | 6     | 1        | 2       |
| 383 | 十亩园  | 20    | 3        | 2        | 3    | 1         | 1      | 2     | 41  | 3      | 21       | 6     | 1        | 2       |
| 384 | 石油   | 46    | 5        | 3        | 2    | 2         | 0      | 1     | 18  | 1      | 1        | 5     | 2        | 2       |
| 385 | 石油   | 46    | 5        | 3        | 2    | 2         | 0      | 2     | 30  | 2      | 8        | 6     | #NULL!   | 2       |
| 386 | 石油   | 46    | 5        | 3        | 2    | 2         | 0      | 2     | 32  | 2      | 10       | 6     | 2        | 2       |
| 387 | 石油   | 46    | 5        | 3        | 2    | 2         | 0      | 2     | 32  | 2      | 11       | 5     | 2        | 2       |
| 388 | 石油   | 46    | 5        | 3        | 2    | 2         | 0      | 2     | 34  | 2      | 12       | 6     | 1        | 2       |
| 389 | 石油   | 46    | 5        | 3        | 2    | 1         | 1      | 2     | 29  | 1      | 7        | 3     | 1        | 2       |
| 390 | 石油   | 46    | 5        | 3        | 1    | 2         | 1      | 2     | 41  | 3      | 21       | 2     | 2        | 1       |
| 391 | 石油   | 46    | 5        | 3        | 2    | 3         | 1      | 2     | 48  | 3      | 21       | 3     | #NULL!   | 2       |
| 392 | 双岗   | 1     | 1        | 1        | 2    | 1         | 0      | 1     | 19  | 1      | 1        | 6     | 1        | 2       |
| 393 | 双岗   | 1     | 1        | 1        | 1    | 2         | 0      | 1     | 22  | 1      | 1        | 5     | 1        | 2       |
| 394 | 双岗   | 1     | 1        | 1        | 2    | 2         | 0      | 1     | 22  | 1      | 1        | 5     | #NULL!   | 2       |
| 395 | 双岗   | 1     | 1        | 1        | 2    | 1         | 0      | 1     | 26  | 1      | 2        | 5     | 1        | 2       |
| 396 | 双岗   | 1     | 1        | 1        | 2    | 1         | 0      | 2     | 26  | 1      | 7        | 5     | 1        | 2       |
| 397 | 双岗   | 1     | 1        | 1        | 2    | 2         | 0      | 1     | 28  | 1      | 4        | 6     | 1        | 2       |
| 398 | 双岗   | 1     | 1        | 1        | 2    | 1         | 0      | 2     | 28  | 1      | 5        | 5     | 1        | 2       |
| 399 | 双岗   | 1     | 1        | 1        | 2    | 1         | 0      | 2     | 28  | 1      | 7        | 5     | 1        | 2       |
| 400 | 双岗   | 1     | 1        | 1        | 2    | 2         | 0      | 2     | 29  | 1      | 7        | 6     | 1        | 2       |
| 401 | 双岗   | 1     | 1        | 1        | 2    | 2         | 0      | 2     | 30  | 2      | 7        | 5     | 1        | 2       |
| 402 | 双岗   | 1     | 1        | 1        | 3    | 2         | 0      | 2     | 33  | 2      | 8        | 2     | 1        | 2       |
| 403 | 双岗   | 1     | 1        | 1        | 3    | 1         | 0      | 2     | 33  | 2      | 11       | 5     | 1        | 1       |
| 404 | 双岗   | 1     | 1        | 1        | 2    | 1         | 0      | 2     | 35  | 2      | 14       | 5     | 1        | 2       |
| 405 | 双岗   | 1     | 1        | 1        | 2    | 2         | 0      | 2     | 36  | 2      | 12       | 2     | 1        | 2       |
| 406 | 双岗   | 1     | 1        | 1        | 2    | 1         | 0      | 2     | 36  | 2      | 15       | 5     | 1        | 2       |
| 407 | 双岗   | 1     | 1        | 1        | 2    | 1         | 0      | 2     | 41  | 3      | 21       | 6     | 1        | 2       |
| 408 | 双岗   | 1     | 1        | 1        | 3    | 1         | 0      | 2     | 41  | 3      | 22       | 6     | 1        | 2       |

| ID  | ORG  | ORGID | DISTRICT | province | rank | quotastat | GENDER | MARRI | AGE | agegrp | WORKYEAR | post2 | FULLTIME | mngment |
|-----|------|-------|----------|----------|------|-----------|--------|-------|-----|--------|----------|-------|----------|---------|
| 409 | 双岗   | 1     | 1        | 1        | 3    | 1         | 0      | 2     | 43  | 3      | 21       | 2     | 1        | 1       |
| 410 | 双岗   | 1     | 1        | 1        | 2    | 2         | 0      | 2     | 47  | 3      | 18       | 5     | 2        | 2       |
| 411 | 双岗   | 1     | 1        | 1        | 3    | 2         | 1      | 2     | 33  | 2      | 8        | 2     | 1        | 1       |
| 412 | 双岗   | 1     | 1        | 1        | 2    | 2         | 1      | 2     | 34  | 2      | 13       | 3     | 1        | 2       |
| 413 | 双岗   | 1     | 1        | 1        | 3    | 2         | 1      | 2     | 39  | 2      | 14       | 2     | 1        | 1       |
| 414 | 双岗   | 1     | 1        | 1        | 3    | 2         | 1      | 2     | 41  | 3      | 18       | 2     | 1        | 1       |
| 415 | 双岗   | 1     | 1        | 1        | 2    | 1         | 1      | 2     | 42  | 3      | 10       | 2     | 1        | 5       |
| 416 | 双桃站  | 39    | 4        | 2        | 2    | 2         | 0      | 1     | 23  | 1      | 1        | 5     | 1        | 2       |
| 417 | 双桃站  | 39    | 4        | 2        | 2    | 2         | 0      | 2     | 27  | 1      | 4        | 5     | 1        | 2       |
| 418 | 双桃站  | 39    | 4        | 2        | 2    | 1         | 0      | 2     | 29  | 1      | 8        | 6     | 1        | 2       |
| 419 | 双桃站  | 39    | 4        | 2        | 2    | 2         | 0      | 2     | 30  | 2      | 6        | 5     | 1        | 2       |
| 420 | 双桃站  | 39    | 4        | 2        | 2    | 3         | 0      | 2     | 30  | 2      | 8        | 5     | 1        | 2       |
| 421 | 双桃站  | 39    | 4        | 2        | 2    | 2         | 0      | 2     | 38  | 2      | 9        | 3     | 1        | 2       |
| 422 | 双桃站  | 39    | 4        | 2        | 2    | 1         | 0      | 2     | 40  | 3      | 20       | 5     | 2        | 2       |
| 423 | 双桃站  | 39    | 4        | 2        | 1    | 2         | 0      | 2     | 42  | 3      | 19       | 5     | 1        | 2       |
| 424 | 双桃站  | 39    | 4        | 2        | 2    | 1         | 0      | 2     | 43  | 3      | 17       | 6     | 1        | 2       |
| 425 | 双桃站  | 39    | 4        | 2        | 3    | 1         | 0      | 2     | 45  | 3      | 20       | 1     | 1        | #NULL!  |
| 426 | 双桃站  | 39    | 4        | 2        | 3    | 3         | 0      | 2     | 60  | 5      | 36       | 1     | #NULL!   | 2       |
| 427 | 双桃中心 | 40    | 4        | 2        | 1    | 2         | 0      | 1     | 23  | 1      | 1        | 6     | 1        | 2       |
| 428 | 双桃中心 | 40    | 4        | 2        | 3    | 1         | 0      | 2     | 35  | 2      | 10       | 2     | 1        | 1       |
| 429 | 双桃中心 | 40    | 4        | 2        | 2    | 1         | 0      | 2     | 37  | 2      | 17       | 5     | #NULL!   | 2       |
| 430 | 双桃中心 | 40    | 4        | 2        | 3    | 3         | 0      | 2     | 54  | 4      | 36       | 6     | 1        | 2       |
| 431 | 双桃中心 | 40    | 4        | 2        | 2    | 1         | 1      | 2     | 55  | 4      | 25       | 2     | 1        | 2       |
| 432 | 四总队  | 48    | 5        | 3        | 2    | 1         | 0      | 2     | 42  | 3      | 17       | 6     | 1        | 2       |
| 433 | 四总队  | 48    | 5        | 3        | 3    | 1         | 0      | 2     | 42  | 3      | 20       | 5     | 1        | 2       |
| 434 | 四总队  | 48    | 5        | 3        | 4    | 1         | 0      | 2     | 54  | 4      | 30       | 2     | 1        | 1       |
| 435 | 登州路  | 36    | 4        | 2        | 2    | 2         | 0      | 1     | 21  | 1      | 2        | 5     | 1        | 2       |
| 436 | 登州路  | 36    | 4        | 2        | 1    | 2         | 0      | 2     | 27  | 1      | 2        | 6     | 1        | 2       |
| 437 | 登州路  | 36    | 4        | 2        | 2    | 2         | 0      | 2     | 27  | 1      | 7        | 6     | 1        | 2       |
| 438 | 登州路  | 36    | 4        | 2        | 2    | 2         | 0      | 2     | 29  | 1      | 5        | 6     | 1        | 2       |
| 439 | 登州路  | 36    | 4        | 2        | 2    | 2         | 0      | 1     | 29  | 1      | 6        | 5     | 1        | 2       |
| 440 | 登州路  | 36    | 4        | 2        | 2    | 2         | 0      | 1     | 32  | 2      | 10       | 5     | 1        | 2       |
| 441 | 登州路  | 36    | 4        | 2        | 2    | 2         | 0      | 1     | 33  | 2      | 10       | 5     | 1        | 2       |
| 442 | 登州路  | 36    | 4        | 2        | 3    | 2         | 0      | 2     | 39  | 2      | 18       | 2     | 1        | 2       |

| ID  | ORG  | ORGID | DISTRICT | province | rank | quotastat | GENDER | MARRI | AGE | agegrp | WORKYEAR | post2 | FULLTIME | mngment |
|-----|------|-------|----------|----------|------|-----------|--------|-------|-----|--------|----------|-------|----------|---------|
| 443 | 登州路  | 36    | 4        | 2        | 2    | 2         | 1      | 2     | 31  | 2      | 9        | 2     | 1        | 2       |
| 444 | 台东八路 | 27    | 4        | 2        | 2    | 1         | 0      | 1     | 25  | 1      | 2        | 5     | 1        | 2       |
| 445 | 台东八路 | 27    | 4        | 2        | 2    | 1         | 0      | 1     | 25  | 1      | 3        | 6     | 1        | 2       |
| 446 | 台东八路 | 27    | 4        | 2        | 2    | 1         | 0      | 1     | 25  | 1      | 5        | 3     | 1        | 2       |
| 447 | 台东八路 | 27    | 4        | 2        | 2    | 1         | 0      | 2     | 30  | 2      | 5        | 4     | 1        | 2       |
| 448 | 台东八路 | 27    | 4        | 2        | 2    | 2         | 0      | 2     | 30  | 2      | 9        | 6     | 1        | 2       |
| 449 | 台东八路 | 27    | 4        | 2        | 2    | 1         | 0      | 2     | 31  | 2      | 4        | 4     | 1        | 2       |
| 450 | 台东八路 | 27    | 4        | 2        | 3    | 1         | 0      | 2     | 47  | 3      | 23       | 2     | 1        | 2       |
| 451 | 台东八路 | 27    | 4        | 2        | 2    | 3         | 0      | 2     | 52  | 4      | 35       | 5     | #NULL!   | 2       |
| 452 | 台东八路 | 27    | 4        | 2        | 2    | 3         | 0      | 2     | 53  | 4      | 33       | 6     | 1        | 2       |
| 453 | 台东八路 | 27    | 4        | 2        | 3    | 2         | 0      | 2     | 59  | 4      | 35       | 6     | 2        | #NULL!  |
| 454 | 台东八路 | 27    | 4        | 2        | 2    | 2         | 1      | 1     | 27  | 1      | 1        | 2     | 1        | 2       |
| 455 | 亭南   | 14    | 2        | 1        | 1    | 2         | 0      | 1     | 22  | 1      | 3        | 6     | 2        | 2       |
| 456 | 亭南   | 14    | 2        | 1        | 2    | 2         | 0      | 2     | 26  | 1      | 5        | 5     | 1        | 2       |
| 457 | 亭南   | 14    | 2        | 1        | 2    | 2         | 0      | 2     | 34  | 2      | 10       | 5     | 1        | 2       |
| 458 | 亭南   | 14    | 2        | 1        | 2    | 2         | 0      | 2     | 41  | 3      | 12       | 2     | 1        | 1       |
| 459 | 亭南   | 14    | 2        | 1        | 1    | 1         | 1      | 2     | 41  | 3      | 6        | 4     | 1        | 1       |
| 460 | 亭南   | 14    | 2        | 1        | 3    | 2         | 1      | 2     | 47  | 3      | 24       | 2     | #NULL!   | 2       |
| 461 | 王家碾  | 53    | 5        | 3        | 1    | 2         | 0      | 1     | 22  | 1      | 1        | 5     | 2        | 2       |
| 462 | 王家碾  | 53    | 5        | 3        | 2    | 2         | 0      | 2     | 25  | 1      | 5        | 6     | 2        | 2       |
| 463 | 王家碾  | 53    | 5        | 3        | 3    | 2         | 0      | 1     | 32  | 2      | 1        | 5     | #NULL!   | 2       |
| 464 | 王家碾  | 53    | 5        | 3        | 2    | 2         | 0      | 2     | 42  | 3      | 21       | 5     | 2        | 2       |
| 465 | 王家碾  | 53    | 5        | 3        | 3    | 3         | 0      | 2     | 57  | 4      | 36       | 3     | #NULL!   | 2       |
| 466 | 阜新   | 38    | 4        | 2        | 1    | 2         | 0      | 1     | 21  | 1      | 0        | 4     | 1        | 2       |
| 467 | 阜新   | 38    | 4        | 2        | 1    | 2         | 0      | 1     | 25  | 1      | 4        | 5     | 1        | 2       |
| 468 | 阜新   | 38    | 4        | 2        | 2    | 2         | 0      | 1     | 27  | 1      | 4        | 6     | 1        | 2       |
| 469 | 阜新   | 38    | 4        | 2        | 3    | 1         | 0      | 2     | 37  | 2      | 19       | 3     | 1        | 1       |
| 470 | 阜新   | 38    | 4        | 2        | 3    | 3         | 0      | 2     | 60  | 5      | 42       | 5     | #NULL!   | 2       |
| 471 | 阜新   | 38    | 4        | 2        | 4    | 2         | 1      | 2     | 60  | 5      | 25       | 1     | 1        | 2       |
| 472 | 卧龙寺站 | 42    | 5        | 3        | 3    | 1         | 0      | 2     | 33  | 2      | 13       | 5     | 1        | 1       |
| 473 | 卧龙寺站 | 42    | 5        | 3        | 2    | 1         | 0      | 2     | 37  | 2      | 12       | 3     | 1        | 2       |
| 474 | 卧龙寺站 | 42    | 5        | 3        | 3    | 1         | 0      | 2     | 37  | 2      | 17       | 1     | 1        | 2       |
| 475 | 卧龙寺站 | 42    | 5        | 3        | 1    | 1         | 0      | 2     | 41  | 3      | 20       | 2     | 1        | 2       |
| 476 | 卧龙寺中 | 43    | 5        | 3        | 2    | 1         | 0      | 1     | 23  | 1      | 2        | 5     | 2        | 2       |

| ID  | ORG  | ORGID | DISTRICT | province | rank | quotastat | GENDER | MARRI | AGE | agegrp | WORKYEAR | post2 | FULLTIME | mngment |
|-----|------|-------|----------|----------|------|-----------|--------|-------|-----|--------|----------|-------|----------|---------|
| 477 | 卧龙寺中 | 43    | 5        | 3        | 3    | 2         | 0      | 1     | 23  | 1      | 2        | 6     | 1        | 2       |
| 478 | 卧龙寺中 | 43    | 5        | 3        | 2    | 2         | 0      | 1     | 25  | 1      | 1        | 5     | 1        | 2       |
| 479 | 卧龙寺中 | 43    | 5        | 3        | 2    | 2         | 0      | 2     | 25  | 1      | 2        | 5     | 2        | 2       |
| 480 | 卧龙寺中 | 43    | 5        | 3        | 2    | 2         | 0      | 1     | 26  | 1      | 2        | 6     | #NULL!   | 2       |
| 481 | 卧龙寺中 | 43    | 5        | 3        | 2    | 2         | 0      | 2     | 30  | 2      | 6        | 6     | 1        | 2       |
| 482 | 卧龙寺中 | 43    | 5        | 3        | 2    | 1         | 0      | 2     | 30  | 2      | 9        | 6     | 1        | 2       |
| 483 | 卧龙寺中 | 43    | 5        | 3        | 2    | 2         | 0      | 2     | 32  | 2      | 10       | 5     | 1        | 2       |
| 484 | 卧龙寺中 | 43    | 5        | 3        | 1    | 2         | 0      | 2     | 34  | 2      | 11       | 5     | 2        | 2       |
| 485 | 卧龙寺中 | 43    | 5        | 3        | 2    | 2         | 0      | 2     | 36  | 2      | 14       | 5     | 1        | 2       |
| 486 | 卧龙寺中 | 43    | 5        | 3        | 2    | 2         | 0      | 2     | 38  | 2      | 18       | 5     | #NULL!   | 2       |
| 487 | 卧龙寺中 | 43    | 5        | 3        | 2    | 2         | 0      | 2     | 38  | 2      | 18       | 5     | 2        | 2       |
| 488 | 卧龙寺中 | 43    | 5        | 3        | 2    | 2         | 0      | 2     | 42  | 3      | 20       | 4     | 1        | 2       |
| 489 | 卧龙寺中 | 43    | 5        | 3        | 3    | 1         | 0      | 2     | 45  | 3      | 22       | 2     | #NULL!   | 2       |
| 490 | 卧龙寺中 | 43    | 5        | 3        | 2    | 2         | 0      | 4     | 46  | 3      | 28       | 6     | 1        | 2       |
| 491 | 卧龙寺中 | 43    | 5        | 3        | 2    | 1         | 0      | 2     | 49  | 3      | 26       | 2     | 1        | 2       |
| 492 | 卧龙寺中 | 43    | 5        | 3        | 2    | 1         | 0      | 2     | 49  | 3      | 30       | 5     | 1        | 2       |
| 493 | 卧龙寺中 | 43    | 5        | 3        | 3    | 3         | 0      | 2     | 55  | 4      | 34       | 2     | 1        | 2       |
| 494 | 卧龙寺中 | 43    | 5        | 3        | 3    | 1         | 1      | 2     | 28  | 1      | 6        | 3     | 2        | 2       |
| 495 | 卧龙寺中 | 43    | 5        | 3        | 2    | 2         | 1      | 2     | 30  | 2      | 4        | 2     | 1        | 2       |
| 496 | 卧龙寺中 | 43    | 5        | 3        | 3    | 3         | 1      | 2     | 53  | 4      | 32       | 2     | #NULL!   | 2       |
| 497 | 无棣路  | 35    | 4        | 2        | 1    | 2         | 0      | 1     | 25  | 1      | 3        | 4     | 1        | 2       |
| 498 | 无棣路  | 35    | 4        | 2        | 2    | 1         | 0      | 1     | 27  | 1      | 3        | 2     | 1        | 2       |
| 499 | 无棣路  | 35    | 4        | 2        | 2    | 1         | 0      | 2     | 31  | 2      | 12       | 5     | 1        | 2       |
| 500 | 无棣路  | 35    | 4        | 2        | 3    | 1         | 0      | 2     | 38  | 2      | 19       | 5     | 1        | 1       |
| 501 | 无棣路  | 35    | 4        | 2        | 4    | 1         | 0      | 2     | 49  | 3      | 32       | 5     | 1        | 2       |
| 502 | 无棣路  | 35    | 4        | 2        | 2    | 1         | 1      | 2     | 31  | 2      | 11       | 6     | 1        | 1       |
| 503 | 无棣路  | 35    | 4        | 2        | 3    | 1         | 1      | 2     | 47  | 3      | 21       | 2     | 1        | 1       |
| 504 | 西关   | 41    | 5        | 3        | 2    | 2         | 0      | 1     | 22  | 1      | 2        | 5     | #NULL!   | #NULL!  |
| 505 | 西关   | 41    | 5        | 3        | 1    | 2         | 0      | 1     | 23  | 1      | 1        | 4     | 1        | 2       |
| 506 | 西关   | 41    | 5        | 3        | 2    | 1         | 0      | 1     | 23  | 1      | 1        | 5     | 1        | 2       |
| 507 | 西关   | 41    | 5        | 3        | 1    | 2         | 0      | 1     | 23  | 1      | 1        | 6     | #NULL!   | 2       |
| 508 | 西关   | 41    | 5        | 3        | 1    | 1         | 0      | 2     | 28  | 1      | 3        | 5     | 2        | 2       |
| 509 | 西关   | 41    | 5        | 3        | 2    | 2         | 0      | 2     | 30  | 2      | 10       | 5     | 1        | 2       |
| 510 | 西关   | 41    | 5        | 3        | 2    | 2         | 0      | 2     | 31  | 2      | 11       | 4     | 1        | 2       |

| ID  | ORG | ORGID | DISTRICT | province | rank | quotastat | GENDER | MARRI | AGE | agegrp | WORKYEAR | post2 | FULLTIME | mngment |
|-----|-----|-------|----------|----------|------|-----------|--------|-------|-----|--------|----------|-------|----------|---------|
| 511 | 西关  | 41    | 5        | 3        | 2    | 1         | 0      | 2     | 33  | 2      | 11       | 6     | 1        | 2       |
| 512 | 西关  | 41    | 5        | 3        | 2    | 1         | 0      | 2     | 37  | 2      | 17       | 5     | 1        | 1       |
| 513 | 西关  | 41    | 5        | 3        | 2    | 1         | 0      | 2     | 38  | 2      | 13       | 2     | 1        | 2       |
| 514 | 西关  | 41    | 5        | 3        | 2    | 1         | 0      | 2     | 40  | 3      | 22       | 5     | 1        | 1       |
| 515 | 西关  | 41    | 5        | 3        | 2    | 1         | 0      | 2     | 41  | 3      | 22       | 5     | 1        | 2       |
| 516 | 西关  | 41    | 5        | 3        | 1    | 1         | 0      | 2     | 43  | 3      | 22       | 6     | 1        | 1       |
| 517 | 西关  | 41    | 5        | 3        | 3    | 1         | 0      | 2     | 50  | 4      | 27       | 2     | 1        | 2       |
| 518 | 西关  | 41    | 5        | 3        | 2    | 2         | 0      | 2     | 56  | 4      | 36       | 6     | #NULL!   | 2       |
| 519 | 西关  | 41    | 5        | 3        | 2    | 1         | 1      | 2     | 29  | 1      | 7        | 6     | 1        | 2       |
| 520 | 西关  | 41    | 5        | 3        | 2    | 2         | 1      | 2     | 35  | 2      | 12       | 1     | 2        | 2       |
| 521 | 西关  | 41    | 5        | 3        | 3    | 1         | 1      | 2     | 42  | 3      | 20       | 1     | 1        | 2       |
| 522 | 西关  | 41    | 5        | 3        | 2    | 1         | 1      | 2     | 42  | 3      | 27       | 6     | 1        | 1       |
| 523 | 西关  | 41    | 5        | 3        | 3    | 1         | 1      | 2     | 50  | 4      | 27       | 6     | 1        | 2       |
| 524 | 逍遥津 | 6     | 1        | 1        | 2    | 2         | 0      | 1     | 23  | 1      | 3        | 5     | 1        | #NULL!  |
| 525 | 逍遥津 | 6     | 1        | 1        | 2    | 2         | 0      | 1     | 24  | 1      | 3        | 5     | 1        | 2       |
| 526 | 逍遥津 | 6     | 1        | 1        | 2    | 2         | 0      | 1     | 24  | 1      | 4        | 5     | 1        | 2       |
| 527 | 逍遥津 | 6     | 1        | 1        | 2    | 2         | 0      | 1     | 25  | 1      | 2        | 6     | 1        | 2       |
| 528 | 逍遥津 | 6     | 1        | 1        | 1    | 2         | 0      | 2     | 27  | 1      | 4        | 5     | 1        | 2       |
| 529 | 逍遥津 | 6     | 1        | 1        | 2    | 2         | 0      | 2     | 28  | 1      | 4        | 2     | 1        | 2       |
| 530 | 逍遥津 | 6     | 1        | 1        | 2    | 2         | 0      | 2     | 28  | 1      | 4        | 5     | 1        | 2       |
| 531 | 逍遥津 | 6     | 1        | 1        | 2    | 2         | 0      | 2     | 28  | 1      | 13       | 6     | 1        | 2       |
| 532 | 逍遥津 | 6     | 1        | 1        | 1    | 2         | 0      | 2     | 31  | 2      | 5        | 6     | 1        | 2       |
| 533 | 逍遥津 | 6     | 1        | 1        | 2    | 2         | 0      | 2     | 32  | 2      | 10       | 5     | 1        | 2       |
| 534 | 逍遥津 | 6     | 1        | 1        | 2    | 2         | 0      | 2     | 33  | 2      | 13       | 5     | 1        | 2       |
| 535 | 逍遥津 | 6     | 1        | 1        | 2    | 1         | 0      | 2     | 34  | 2      | 14       | 2     | 1        | 2       |
| 536 | 逍遥津 | 6     | 1        | 1        | 2    | 2         | 0      | 2     | 34  | 2      | 14       | 4     | 1        | 2       |
| 537 | 逍遥津 | 6     | 1        | 1        | 2    | 1         | 0      | 2     | 36  | 2      | 6        | 2     | 1        | 2       |
| 538 | 逍遥津 | 6     | 1        | 1        | 2    | 2         | 0      | 2     | 36  | 2      | 13       | 5     | 1        | 2       |
| 539 | 逍遥津 | 6     | 1        | 1        | 2    | 1         | 0      | 2     | 39  | 2      | 10       | 1     | 1        | 1       |
| 540 | 逍遥津 | 6     | 1        | 1        | 2    | 2         | 0      | 2     | 43  | 3      | 19       | 6     | #NULL!   | 2       |
| 541 | 逍遥津 | 6     | 1        | 1        | 3    | 1         | 0      | 2     | 43  | 3      | 25       | 3     | 1        | 2       |
| 542 | 逍遥津 | 6     | 1        | 1        | 2    | 2         | 1      | 1     | 26  | 1      | 3        | 3     | 1        | 2       |
| 543 | 逍遥津 | 6     | 1        | 1        | 2    | 1         | 1      | 2     | 30  | 2      | 3        | 5     | 1        | 2       |
| 544 | 逍遥津 | 6     | 1        | 1        | 2    | 1         | 1      | 2     | 30  | 2      | 10       | 6     | 1        | 2       |



| ID  | ORG  | ORGID | DISTRICT | province | rank | quotastat | GENDER | MARRI | AGE | agegrp | WORKYEAR | post2 | FULLTIME | mngment |
|-----|------|-------|----------|----------|------|-----------|--------|-------|-----|--------|----------|-------|----------|---------|
| 545 | 逍遥津  | 6     | 1        | 1        | 1    | 1         | 1      | 2     | 34  | 2      | 7        | 4     | 1        | 1       |
| 546 | 逍遥津  | 6     | 1        | 1        | 2    | 1         | 1      | 2     | 35  | 2      | 11       | 2     | 1        | 2       |
| 547 | 逍遥津  | 6     | 1        | 1        | 1    | 2         | 1      | 2     | 37  | 2      | 15       | 6     | 1        | 2       |
| 548 | 逍遥津  | 6     | 1        | 1        | 2    | 2         | 1      | 2     | 38  | 2      | 18       | 3     | 1        | 2       |
| 549 | 逍遥津  | 6     | 1        | 1        | 3    | 2         | 1      | 2     | 40  | 3      | 16       | 6     | 1        | 2       |
| 550 | 逍遥津  | 6     | 1        | 1        | 3    | 1         | 1      | 2     | 43  | 3      | 18       | 6     | #NULL!   | 1       |
| 551 | 逍遥津  | 6     | 1        | 1        | 3    | 1         | 1      | 2     | 45  | 3      | 22       | 3     | 1        | 2       |
| 552 | 逍遥津  | 6     | 1        | 1        | 2    | 1         | 1      | 2     | 48  | 3      | 26       | 2     | #NULL!   | 2       |
| 553 | 逍遥津  | 6     | 1        | 1        | 2    | 1         | 1      | 2     | 59  | 4      | 37       | 6     | #NULL!   | 2       |
| 554 | 小港   | 33    | 4        | 2        | 1    | 2         | 0      | 1     | 26  | 1      | 2        | 1     | 2        | 2       |
| 555 | 小港   | 33    | 4        | 2        | 2    | 2         | 0      | 2     | 26  | 1      | 4        | 5     | 1        | 2       |
| 556 | 小港   | 33    | 4        | 2        | 2    | 2         | 0      | 2     | 30  | 2      | 8        | 5     | 1        | 2       |
| 557 | 小港   | 33    | 4        | 2        | 2    | 2         | 0      | 2     | 37  | 2      | 13       | 5     | 2        | 2       |
| 558 | 小港   | 33    | 4        | 2        | 2    | 2         | 1      | 1     | 26  | 1      | 3        | 3     | 1        | 2       |
| 559 | 新福路  | 55    | 5        | 3        | 2    | 2         | 0      | 1     | 22  | 1      | 1        | 5     | 1        | 2       |
| 560 | 新福路  | 55    | 5        | 3        | 3    | 2         | 0      | 2     | 47  | 3      | 23       | 2     | 2        | 2       |
| 561 | 新福路  | 55    | 5        | 3        | 1    | 2         | 1      | 2     | 25  | 1      | 2        | 4     | 1        | 1       |
| 562 | 杏花街道 | 5     | 1        | 1        | 1    | 2         | 0      | 1     | 23  | 1      | 1        | 4     | 1        | 1       |
| 563 | 杏花街道 | 5     | 1        | 1        | 2    | 2         | 0      | 1     | 23  | 1      | 2        | 5     | 1        | 2       |
| 564 | 杏花街道 | 5     | 1        | 1        | 2    | 2         | 0      | 1     | 23  | 1      | 2        | 5     | 1        | 2       |
| 565 | 杏花街道 | 5     | 1        | 1        | 1    | 1         | 0      | 2     | 26  | 1      | 4        | 5     | 2        | 2       |
| 566 | 杏花街道 | 5     | 1        | 1        | 2    | 1         | 0      | 2     | 26  | 1      | 5        | 5     | 1        | 2       |
| 567 | 杏花街道 | 5     | 1        | 1        | 2    | 2         | 0      | 2     | 27  | 1      | 5        | 1     | 1        | 2       |
| 568 | 杏花街道 | 5     | 1        | 1        | 2    | 1         | 0      | 2     | 29  | 1      | 8        | 5     | 1        | 1       |
| 569 | 杏花街道 | 5     | 1        | 1        | 2    | 2         | 0      | 2     | 30  | 2      | 7        | 2     | 1        | 2       |
| 570 | 杏花街道 | 5     | 1        | 1        | 2    | 2         | 0      | 2     | 32  | 2      | 12       | 5     | 1        | 1       |
| 571 | 杏花街道 | 5     | 1        | 1        | 2    | 1         | 0      | 2     | 34  | 2      | 10       | 6     | 1        | 2       |
| 572 | 杏花街道 | 5     | 1        | 1        | 2    | 2         | 0      | 2     | 35  | 2      | 7        | 5     | #NULL!   | 2       |
| 573 | 杏花街道 | 5     | 1        | 1        | 1    | 1         | 0      | 2     | 47  | 3      | 27       | 5     | 1        | 2       |
| 574 | 杏花街道 | 5     | 1        | 1        | 1    | 2         | 1      | 1     | 26  | 1      | 1        | 1     | 1        | 2       |
| 575 | 杏花街道 | 5     | 1        | 1        | 2    | 2         | 1      | 2     | 28  | 1      | 7        | 3     | 1        | 2       |
| 576 | 杏花街道 | 5     | 1        | 1        | 2    | 1         | 1      | 2     | 31  | 2      | 6        | 1     | 1        | 1       |
| 577 | 杏花街道 | 5     | 1        | 1        | 1    | 1         | 1      | 2     | 38  | 2      | 10       | 4     | 1        | 1       |
| 578 | 杏花街道 | 5     | 1        | 1        | 2    | 1         | 1      | 2     | 41  | 3      | 20       | 4     | 1        | 2       |

| ID  | ORG  | ORGID | DISTRICT | province | rank | quotastat | GENDER | MARRI | AGE | agegrp | WORKYEAR | post2 | FULLTIME | mngment |
|-----|------|-------|----------|----------|------|-----------|--------|-------|-----|--------|----------|-------|----------|---------|
| 579 | 杏花街道 | 5     | 1        | 1        | 3    | 1         | 1      | 2     | 52  | 4      | 30       | 6     | 1        | 1       |
| 580 | 延安路  | 26    | 4        | 2        | 2    | 2         | 0      | 1     | 25  | 1      | 3        | 6     | 1        | 2       |
| 581 | 延安路  | 26    | 4        | 2        | 2    | 1         | 0      | 2     | 25  | 1      | 5        | 6     | 1        | 2       |
| 582 | 延安路  | 26    | 4        | 2        | 1    | 1         | 0      | 1     | 26  | 1      | 2        | 1     | #NULL!   | 2       |
| 583 | 延安路  | 26    | 4        | 2        | 2    | 1         | 0      | 1     | 27  | 1      | 2        | 1     | 1        | 2       |
| 584 | 延安路  | 26    | 4        | 2        | 2    | 1         | 0      | 1     | 27  | 1      | 2        | 4     | 1        | 2       |
| 585 | 延安路  | 26    | 4        | 2        | 2    | 1         | 0      | 2     | 27  | 1      | 3        | 6     | 1        | 2       |
| 586 | 延安路  | 26    | 4        | 2        | 2    | 2         | 0      | 2     | 27  | 1      | 7        | 5     | 1        | 2       |
| 587 | 延安路  | 26    | 4        | 2        | 2    | 1         | 0      | 1     | 28  | 1      | 8        | 5     | 1        | 2       |
| 588 | 延安路  | 26    | 4        | 2        | 2    | 1         | 0      | 2     | 35  | 2      | 12       | 5     | 1        | 2       |
| 589 | 延安路  | 26    | 4        | 2        | 2    | 1         | 0      | 2     | 37  | 2      | 15       | 5     | 1        | 2       |
| 590 | 延安路  | 26    | 4        | 2        | 2    | 2         | 0      | 2     | 37  | 2      | 16       | 6     | 1        | 2       |
| 591 | 延安路  | 26    | 4        | 2        | 3    | 1         | 0      | 1     | 39  | 2      | 15       | 4     | 1        | 2       |
| 592 | 延安路  | 26    | 4        | 2        | 1    | 2         | 0      | 2     | 43  | 3      | 20       | 6     | 1        | 2       |
| 593 | 延安路  | 26    | 4        | 2        | 2    | 1         | 0      | 2     | 47  | 3      | 29       | 5     | #NULL!   | 2       |
| 594 | 延安路  | 26    | 4        | 2        | 2    | 3         | 0      | 2     | 54  | 4      | 30       | 4     | #NULL!   | 2       |
| 595 | 延安路  | 26    | 4        | 2        | 3    | 2         | 0      | 2     | 56  | 4      | 37       | 5     | 2        | 2       |
| 596 | 延安路  | 26    | 4        | 2        | 3    | 1         | 1      | 2     | 33  | 2      | 6        | 2     | 1        | 2       |
| 597 | 延安路  | 26    | 4        | 2        | 2    | 1         | 1      | 2     | 53  | 4      | 35       | 6     | 1        | #NULL!  |
| 598 | 姚家   | 21    | 3        | 2        | 2    | 2         | 0      | 1     | 22  | 1      | 1        | 5     | 1        | 2       |
| 599 | 姚家   | 21    | 3        | 2        | 2    | 2         | 0      | 1     | 22  | 1      | 1        | 5     | 1        | 2       |
| 600 | 姚家   | 21    | 3        | 2        | 2    | 2         | 0      | 1     | 24  | 1      | 2        | 4     | 1        | 2       |
| 601 | 姚家   | 21    | 3        | 2        | 2    | 2         | 0      | 1     | 25  | 1      | 1        | 5     | 1        | 2       |
| 602 | 姚家   | 21    | 3        | 2        | 1    | 2         | 0      | 2     | 25  | 1      | 2        | 1     | 1        | 2       |
| 603 | 姚家   | 21    | 3        | 2        | 2    | 1         | 0      | 2     | 25  | 1      | 6        | 4     | 2        | 2       |
| 604 | 姚家   | 21    | 3        | 2        | 1    | 2         | 0      | 2     | 26  | 1      | 2        | 1     | 1        | 2       |
| 605 | 姚家   | 21    | 3        | 2        | 2    | 2         | 0      | 1     | 26  | 1      | 6        | 5     | 1        | 2       |
| 606 | 姚家   | 21    | 3        | 2        | 2    | 1         | 0      | 1     | 27  | 1      | 1        | 1     | 1        | 2       |
| 607 | 姚家   | 21    | 3        | 2        | 2    | 2         | 0      | 2     | 28  | 1      | 7        | 5     | 1        | 2       |
| 608 | 姚家   | 21    | 3        | 2        | 2    | 1         | 0      | 2     | 29  | 1      | 6        | 5     | 1        | 2       |
| 609 | 姚家   | 21    | 3        | 2        | 2    | 2         | 0      | 2     | 30  | 2      | 5        | 5     | 1        | 2       |
| 610 | 姚家   | 21    | 3        | 2        | 2    | 2         | 0      | 2     | 31  | 2      | 5        | 5     | 1        | 2       |
| 611 | 姚家   | 21    | 3        | 2        | 3    | 1         | 0      | 2     | 32  | 2      | 11       | 2     | 1        | 2       |
| 612 | 姚家   | 21    | 3        | 2        | 3    | 1         | 0      | 2     | 33  | 2      | 7        | 2     | 1        | 2       |

| ID  | ORG | ORGID | DISTRICT | province | rank | quotastat | GENDER | MARRI | AGE | agegrp | WORKYEAR | post2 | FULLTIME | mngment |
|-----|-----|-------|----------|----------|------|-----------|--------|-------|-----|--------|----------|-------|----------|---------|
| 613 | 姚家  | 21    | 3        | 2        | 3    | 1         | 0      | 2     | 35  | 2      | 11       | 4     | 1        | 2       |
| 614 | 姚家  | 21    | 3        | 2        | 2    | 2         | 0      | 2     | 36  | 2      | 13       | 5     | 1        | 2       |
| 615 | 姚家  | 21    | 3        | 2        | 2    | 2         | 0      | 2     | 38  | 2      | 3        | 2     | 1        | 2       |
| 616 | 姚家  | 21    | 3        | 2        | 3    | 1         | 0      | 2     | 44  | 3      | 21       | 5     | 1        | 1       |
| 617 | 姚家  | 21    | 3        | 2        | 3    | 1         | 0      | 2     | 44  | 3      | 24       | 1     | 1        | 2       |
| 618 | 姚家  | 21    | 3        | 2        | 3    | 1         | 0      | 2     | 48  | 3      | 28       | 5     | 1        | 1       |
| 619 | 姚家  | 21    | 3        | 2        | 1    | 2         | 1      | 1     | 26  | 1      | 1        | 1     | 2        | 2       |
| 620 | 引渭路 | 52    | 5        | 3        | 2    | 1         | 0      | 2     | 24  | 1      | 1        | 5     | 1        | 2       |
| 621 | 引渭路 | 52    | 5        | 3        | 1    | 1         | 0      | 2     | 28  | 1      | 1        | 6     | 1        | 1       |
| 622 | 引渭路 | 52    | 5        | 3        | 2    | 1         | 0      | 2     | 34  | 2      | 11       | 1     | 2        | 2       |
| 623 | 引渭路 | 52    | 5        | 3        | 3    | 1         | 1      | 2     | 33  | 2      | 8        | 2     | 1        | 2       |
| 624 | 玉琳路 | 10    | 2        | 1        | 2    | 2         | 0      | 1     | 21  | 1      | 1        | 5     | 2        | 2       |
| 625 | 玉琳路 | 10    | 2        | 1        | 2    | 2         | 0      | 1     | 25  | 1      | 6        | 5     | 1        | 2       |
| 626 | 玉琳路 | 10    | 2        | 1        | 3    | 1         | 0      | 2     | 38  | 2      | 16       | 5     | 1        | 1       |
| 627 | 玉琳路 | 10    | 2        | 1        | 3    | 1         | 0      | 2     | 39  | 2      | 20       | 5     | 1        | 1       |
| 628 | 玉琳路 | 10    | 2        | 1        | 3    | 1         | 0      | 2     | 43  | 3      | 21       | 4     | 1        | 1       |
| 629 | 玉琳路 | 10    | 2        | 1        | 3    | 1         | 0      | 2     | 45  | 3      | 20       | 1     | 1        | 2       |
| 630 | 玉琳路 | 10    | 2        | 1        | 3    | 1         | 0      | 2     | 45  | 3      | 24       | 5     | 1        | 1       |
| 631 | 玉琳路 | 10    | 2        | 1        | 3    | 1         | 0      | 3     | 48  | 3      | 30       | 5     | 1        | 2       |
| 632 | 玉琳路 | 10    | 2        | 1        | 3    | 1         | 0      | 2     | 49  | 3      | 29       | 5     | 1        | 2       |
| 633 | 玉琳路 | 10    | 2        | 1        | 2    | 1         | 1      | 2     | 37  | 2      | 13       | 1     | 1        | 2       |
| 634 | 玉琳路 | 10    | 2        | 1        | 2    | 1         | 1      | 2     | 42  | 3      | 18       | 1     | #NULL!   | #NULL!  |
| 635 | 玉琳路 | 10    | 2        | 1        | 3    | 1         | 1      | 2     | 44  | 3      | 20       | 1     | 1        | 1       |
| 636 | 玉琳路 | 10    | 2        | 1        | 3    | 1         | 1      | 2     | 46  | 3      | 27       | 1     | 1        | 2       |
| 637 | 玉琳路 | 10    | 2        | 1        | 3    | 1         | 1      | 2     | 50  | 4      | 33       | 1     | #NULL!   | 2       |
| 638 | 玉琳路 | 10    | 2        | 1        | 4    | 1         | 1      | 2     | 51  | 4      | 28       | 1     | 1        | 1       |
| 639 | 玉琳路 | 10    | 2        | 1        | 3    | 2         | 1      | 2     | 52  | 4      | 32       | 2     | 1        | 1       |
| 640 | 玉琳路 | 10    | 2        | 1        | 3    | 1         | 1      | 2     | 54  | 4      | 34       | 3     | 1        | 1       |
| 641 | 中山路 | 44    | 5        | 3        | 2    | 1         | 0      | 2     | 33  | 2      | 10       | 4     | 1        | 2       |
| 642 | 中山路 | 44    | 5        | 3        | 2    | 1         | 0      | 2     | 33  | 2      | 12       | 6     | 1        | 2       |
| 643 | 中山路 | 44    | 5        | 3        | 2    | 1         | 0      | 2     | 36  | 2      | 13       | 4     | 1        | 2       |
| 644 | 中山路 | 44    | 5        | 3        | 2    | 1         | 0      | 2     | 38  | 2      | 15       | 1     | 1        | 2       |
| 645 | 中山路 | 44    | 5        | 3        | 3    | 1         | 0      | 2     | 38  | 2      | 17       | 1     | #NULL!   | 2       |
| 646 | 中山路 | 44    | 5        | 3        | 2    | 1         | 0      | 2     | 39  | 2      | 12       | 6     | 1        | 2       |

| ID  | ORG | ORGID | DISTRICT | province | rank | quotastat | GENDER | MARRI | AGE | agegrp | WORKYEAR | post2 | FULLTIME | mngment |
|-----|-----|-------|----------|----------|------|-----------|--------|-------|-----|--------|----------|-------|----------|---------|
| 647 | 中山路 | 44    | 5        | 3        | 3    | 1         | 0      | 2     | 40  | 3      | 19       | 4     | 1        | 2       |
| 648 | 中山路 | 44    | 5        | 3        | 3    | 1         | 0      | 2     | 41  | 3      | 22       | 5     | 1        | 2       |
| 649 | 中山路 | 44    | 5        | 3        | 2    | 2         | 0      | 2     | 42  | 3      | 20       | 5     | 2        | 2       |
| 650 | 中山路 | 44    | 5        | 3        | 3    | 1         | 0      | 2     | 42  | 3      | 22       | 5     | 1        | 2       |
| 651 | 中山路 | 44    | 5        | 3        | 3    | 1         | 0      | 2     | 44  | 3      | 25       | 5     | 1        | 2       |
| 652 | 中山路 | 44    | 5        | 3        | 3    | 1         | 0      | 2     | 44  | 3      | 26       | 5     | 1        | 1       |
| 653 | 中山路 | 44    | 5        | 3        | 3    | 1         | 0      | 2     | 49  | 3      | 31       | 5     | 1        | 2       |
| 654 | 中山路 | 44    | 5        | 3        | 3    | 1         | 1      | 2     | 36  | 2      | 13       | 2     | 1        | 2       |
| 655 | 中山路 | 44    | 5        | 3        | 3    | 1         | 1      | 2     | 41  | 3      | 17       | 3     | 1        | 2       |
| 656 | 中山路 | 44    | 5        | 3        | 4    | 1         | 1      | 2     | 48  | 3      | 24       | 2     | 1        | 2       |

| ID | MEDEDUCA | WESTMED | CTM | WCM | PREVENT | NURSING | MEDLAB | ORAL | PHARM | GPAE | REHAB | HEALTHMA | OTHERAE |
|----|----------|---------|-----|-----|---------|---------|--------|------|-------|------|-------|----------|---------|
| 1  | 2        | N       | N   | N   | N       | N       | N      | N    | N     | N    | N     | Y        |         |
| 2  | 2        | N       | N   | N   | N       | N       | N      | N    | Y     | N    | N     | N        |         |
| 3  | 2        | N       | N   | N   | N       | N       | N      | N    | N     | N    | N     | Y        |         |
| 4  | 2        | N       | N   | N   | N       | N       | N      | N    | Y     | N    | N     | N        |         |
| 5  | 2        | N       | N   | N   | N       | N       | Y      | N    | N     | N    | N     | N        |         |
| 6  | 3        | Y       | N   | N   | N       | N       | N      | N    | N     | N    | N     | N        |         |
| 7  | 2        | N       | Y   | N   | N       | N       | N      | N    | N     | N    | N     | N        |         |
| 8  | 2        | N       | Y   | N   | N       | N       | N      | N    | N     | N    | N     | N        |         |
| 9  | 4        | N       | Y   | N   | N       | N       | N      | N    | N     | N    | N     | N        |         |
| 10 | 2        | Y       | N   | N   | Y       | Y       | N      | N    | Y     | Y    | N     | Y        |         |
| 11 | 2        | N       | N   | N   | N       | Y       | N      | N    | N     | N    | N     | N        |         |
| 12 | 3        | N       | N   | N   | N       | Y       | N      | N    | N     | N    | N     | N        |         |
| 13 | 1        | Y       | N   | N   | Y       | Y       | N      | N    | Y     | N    | N     | N        |         |
| 14 | 1        | N       | N   | N   | N       | N       | N      | N    | Y     | N    | N     | N        |         |
| 15 | 3        | N       | Y   | N   | N       | N       | N      | N    | Y     | N    | N     | N        |         |
| 16 | 1        | Y       | N   | N   | N       | N       | N      | N    | N     | N    | N     | N        |         |
| 17 | 2        | Y       | N   | N   | N       | N       | N      | N    | N     | N    | N     | N        |         |
| 18 | 2        |         |     |     |         |         |        |      |       |      |       |          |         |
| 19 | 2        | N       | Y   | N   | N       | N       | N      | N    | N     | N    | N     | N        |         |
| 20 | 2        | Y       | N   | N   | N       | N       | N      | N    | N     | N    | N     | N        |         |
| 21 | 1        | N       | N   | N   | N       | Y       | N      | N    | N     | N    | N     | N        |         |
| 22 | 1        | N       | N   | N   | N       | Y       | N      | N    | N     | N    | N     | N        |         |
| 23 | 2        | Y       | N   | N   | N       | N       | N      | N    | N     | N    | N     | N        |         |
| 24 | 2        | N       | N   | Y   | N       | N       | N      | N    | N     | N    | N     | N        |         |
| 25 | 2        | N       | N   | N   | N       | N       | Y      | N    | N     | N    | N     | N        |         |
| 26 | 2        | Y       | N   | N   | N       | N       | N      | N    | N     | N    | N     | N        |         |
| 27 | 2        | Y       | N   | N   | N       | N       | N      | N    | N     | N    | N     | N        |         |
| 28 | 2        | Y       | N   | N   | N       | N       | N      | N    | N     | N    | N     | N        |         |
| 29 | 1        | N       | N   | N   | N       | Y       | N      | N    | N     | N    | N     | N        |         |
| 30 | 1        | N       | N   | N   | N       | Y       | N      | N    | N     | N    | N     | N        |         |
| 31 | 2        | N       | N   | N   | N       | Y       | N      | N    | N     | N    | N     | N        |         |
| 32 | 3        | N       | N   | N   | Y       | N       | N      | N    | N     | N    | N     | N        |         |
| 33 | 3        | Y       | N   | N   | N       | N       | N      | N    | N     | N    | N     | N        |         |
| 34 | 3        | N       | N   | N   | N       | Y       | N      | N    | N     | N    | N     | N        |         |

| ID | MEDEDUCA | WESTMED | CTM | WCM | PREVENT | NURSING | MEDLAB | ORAL | PHARM | GPAE | REHAB | HEALTHMA | OTHERAE |
|----|----------|---------|-----|-----|---------|---------|--------|------|-------|------|-------|----------|---------|
| 35 | 3        | Y       | N   | N   | N       | N       | N      | N    | N     | N    | N     | N        |         |
| 36 | 2        | N       | N   | N   | N       | Y       | N      | N    | N     | N    | N     | N        |         |
| 37 | 2        | N       | N   | N   | N       | Y       | N      | N    | N     | N    | N     | N        |         |
| 38 | 3        | N       | N   | N   | N       | Y       | N      | N    | N     | N    | N     | N        |         |
| 39 | 3        | N       | N   | N   | N       | Y       | N      | N    | N     | N    | N     | N        |         |
| 40 | 2        | Y       | N   | N   | N       | N       | N      | N    | N     | N    | N     | N        |         |
| 41 | 2        | Y       | N   | N   | N       | N       | N      | N    | N     | Y    | N     | N        |         |
| 42 | 3        | Y       | N   | N   | N       | N       | N      | N    | N     | Y    | N     | N        |         |
| 43 | 2        | N       | Y   | N   | N       | N       | N      | N    | N     | N    | N     | N        |         |
| 44 | 3        | Y       | N   | N   | N       | N       | N      | N    | N     | N    | N     | N        |         |
| 45 | 3        | Y       | N   | N   | N       | N       | N      | N    | N     | N    | N     | N        |         |
| 46 | 3        | Y       | N   | N   | N       | N       | N      | N    | N     | N    | N     | N        |         |
| 47 | 2        | N       | N   | N   | N       | Y       | N      | N    | N     | Y    | N     | N        |         |
| 48 | 1        | N       | N   | N   | N       | Y       | N      | N    | N     | N    | N     | N        |         |
| 49 | 1        | Y       | N   | N   | N       | N       | N      | N    | N     | N    | N     | N        |         |
| 50 | 2        | N       | N   | N   | N       | Y       | N      | N    | N     | N    | N     | N        |         |
| 51 | 3        | Y       | N   | N   | N       | N       | N      | N    | N     | N    | N     | N        |         |
| 52 | 1        | N       | N   | N   | N       | Y       | N      | N    | N     | N    | N     | N        |         |
| 53 | 2        | N       | N   | N   | N       | N       | N      | N    | Y     | N    | N     | N        |         |
| 54 | 2        | N       | N   | N   | N       | Y       | N      | N    | N     | N    | N     | N        |         |
| 55 | 2        | N       | N   | N   | N       | Y       | N      | N    | N     | N    | N     | N        |         |
| 56 | 1        | N       | N   | N   | N       | Y       | N      | N    | N     | N    | N     | N        |         |
| 57 | 2        | Y       | N   | N   | N       | N       | N      | N    | N     | Y    | N     | N        |         |
| 58 | 1        | N       | N   | N   | N       | Y       | N      | N    | N     | N    | N     | N        |         |
| 59 | 3        | N       | N   | N   | N       | N       | N      | N    | Y     | N    | N     | N        |         |
| 60 | 2        | N       | N   | N   | N       | N       | Y      | N    | N     | N    | N     | N        |         |
| 61 | 2        | Y       | N   | N   | N       | N       | N      | N    | N     | N    | N     | N        |         |
| 62 | 3        | Y       | N   | N   | N       | N       | N      | N    | N     | N    | N     | N        |         |
| 63 | 3        | Y       | N   | N   | N       | N       | N      | N    | N     | Y    | N     | N        |         |
| 64 | 3        | N       | Y   | N   | N       | N       | N      | N    | N     | N    | N     | N        |         |
| 65 | 1        | Y       | N   | N   | N       | N       | N      | N    | N     | N    | N     | N        |         |
| 66 | 3        | N       | N   | N   | N       | Y       | N      | N    | N     | N    | N     | N        |         |
| 67 | 1        | N       | N   | N   | N       | Y       | N      | N    | N     | N    | N     | N        |         |
| 68 | 1        | N       | N   | N   | N       | Y       | N      | N    | N     | N    | N     | N        |         |







| ID  | MEDEDUCA | WESTMED | CTM | WCM | PREVENT | NURSING | MEDLAB | ORAL | PHARM | GPAE | REHAB | HEALTHMA | OTHERAE |
|-----|----------|---------|-----|-----|---------|---------|--------|------|-------|------|-------|----------|---------|
| 137 | 2        | N       | N   | N   | N       | N       | N      | N    | Y     | N    | N     | N        | N       |
| 138 | 2        | N       | N   | N   | N       | N       | N      | N    | N     | N    | N     | N        | Y       |
| 139 | 3        | N       | N   | N   | Y       | N       | N      | N    | N     | N    | N     | N        | N       |
| 140 | 3        | N       | Y   | Y   | N       | N       | N      | N    | N     | Y    | N     | N        | N       |
| 141 | 2        | Y       | N   | N   | N       | N       | N      | N    | N     | N    | N     | N        | N       |
| 142 | 2        | Y       | N   | N   | N       | N       | N      | N    | N     | N    | N     | N        | N       |
| 143 | 3        | N       | N   | N   | Y       | N       | N      | N    | N     | N    | N     | N        | N       |
| 144 | 2        |         |     |     |         | Y       |        |      |       |      |       |          |         |
| 145 | 2        |         |     |     |         | Y       |        |      |       |      |       |          |         |
| 146 | 1        |         |     |     |         | Y       |        |      |       |      |       |          |         |
| 147 | 2        |         |     |     |         | Y       |        |      |       |      |       |          |         |
| 148 | 2        | Y       |     |     |         |         |        |      |       | Y    |       |          |         |
| 149 | 1        |         |     |     |         |         |        |      | Y     |      |       |          |         |
| 150 | 2        | N       | N   | N   | N       | Y       | N      | N    | N     | N    | N     | N        | N       |
| 151 | 1        | N       | N   | N   | N       | Y       | N      | N    | N     | N    | N     | N        | N       |
| 152 | 2        | N       | N   | N   | N       | N       | N      | N    | Y     | N    | N     | N        | N       |
| 153 | 1        | N       | N   | N   | N       | N       | Y      | N    | N     | N    | N     | N        | N       |
| 154 | 2        | N       | N   | N   | N       | Y       | N      | N    | N     | N    | N     | N        | N       |
| 155 | 1        | Y       | N   | N   | N       | N       | N      | N    | N     | N    | N     | N        | N       |
| 156 | 1        | Y       | N   | N   | N       | N       | N      | N    | N     | N    | N     | N        |         |
| 157 | 2        |         |     |     |         |         |        |      |       |      |       |          |         |
| 158 | 2        | N       | Y   | N   | N       | N       | N      | N    | N     | N    | N     | N        |         |
| 159 | 2        | Y       | Y   | Y   | Y       | N       | N      | N    | N     | Y    | Y     | N        |         |
| 160 | 1        | N       | N   | N   | N       | Y       | N      | N    | N     | N    | N     | N        |         |
| 161 | 2        |         |     |     |         |         |        |      |       |      |       |          |         |
| 162 | 3        | N       | Y   | N   | N       | N       | N      | N    | N     | N    | N     | N        |         |
| 163 | 2        | Y       | N   | N   | N       | N       | N      | N    | N     | N    | N     | N        |         |
| 164 | 3        | N       | Y   | N   | N       | N       | N      | N    | N     | N    | N     | N        |         |
| 165 | 1        | N       | N   | N   | N       | Y       | N      | N    | N     | N    | N     | N        |         |
| 166 | 1        | Y       | N   | N   | N       | Y       | N      | N    | N     | N    | N     | N        |         |
| 167 | 2        | N       | Y   | N   | N       | N       | N      | N    | N     | N    | N     | N        |         |
| 168 | 2        | N       | N   | N   | N       | N       | Y      | N    | N     | N    | N     | N        |         |
| 169 | 2        | Y       | N   | Y   | N       | N       | N      | N    | N     | N    | N     | N        |         |
| 170 | 2        | N       | N   | N   | N       | Y       | N      | N    | N     | N    | N     | N        | N       |

| ID  | MEDEDUCA | WESTMED | CTM | WCM | PREVENT | NURSING | MEDLAB | ORAL | PHARM | GPAE | REHAB | HEALTHMA | OTHERAE |
|-----|----------|---------|-----|-----|---------|---------|--------|------|-------|------|-------|----------|---------|
| 171 | 2        | N       | Y   | N   | N       | N       | N      | N    | N     | N    | N     | N        | N       |
| 172 | 2        | N       | Y   | Y   | N       | N       | N      | N    | N     | N    | N     | N        | N       |
| 173 | 1        | N       | N   | N   | N       | Y       | N      | N    | N     | N    | N     | N        |         |
| 174 | 2        | N       | N   | N   | N       | N       | N      | N    | N     | Y    | N     | N        |         |
| 175 | 1        | N       | N   | N   | N       | Y       | N      | N    | N     | N    | N     | N        |         |
| 176 | 1        | N       | N   | N   | N       | Y       | N      | N    | N     | N    | N     | N        |         |
| 177 | 2        | N       | N   | N   | N       | N       | N      | N    | Y     | N    | N     | N        |         |
| 178 | 2        | N       | N   | N   | N       | Y       | N      | N    | N     | N    | N     | N        |         |
| 179 | 2        | N       | N   | N   | N       | N       | N      | N    | Y     | N    | N     | N        |         |
| 180 | 2        | N       | N   | N   | N       | Y       | N      | N    | N     | N    | N     | N        |         |
| 181 | 5        | N       | N   | N   | N       | Y       | N      | N    | N     | N    | N     | N        |         |
| 182 | 3        | N       | N   | N   | N       | Y       | N      | N    | N     | N    | N     | N        |         |
| 183 | 2        | N       | N   | N   | N       | Y       | N      | N    | N     | N    | N     | N        |         |
| 184 | 1        | N       | N   | N   | N       | Y       | N      | N    | N     | N    | N     | N        |         |
| 185 | 3        | N       | N   | N   | N       | Y       | N      | N    | N     | N    | N     | N        |         |
| 186 | 2        | Y       | N   | N   | N       | N       | N      | N    | N     | N    | N     | N        |         |
| 187 | 1        | Y       | N   | N   | N       | N       | Y      | N    | N     | N    | N     | N        |         |
| 188 | 3        | N       | N   | Y   | N       | N       | N      | N    | N     | N    | N     | N        |         |
| 189 | 3        | Y       | N   | N   | N       | N       | N      | N    | N     | N    | N     | N        |         |
| 190 | 5        | N       | N   | N   | N       | N       | N      | N    | N     | N    | N     | N        | Y       |
| 191 | 2        | N       | N   | N   | N       | N       | N      | N    | Y     | N    | N     | N        | N       |
| 192 | 2        | N       | N   | N   | N       | N       | N      | N    | N     | N    | Y     | N        | N       |
| 193 | 2        | N       | N   | N   | N       | Y       | N      | N    | N     | N    | N     | N        | N       |
| 194 | 3        | Y       | N   | N   | N       | N       | N      | N    | N     | N    | N     | N        | N       |
| 195 | 4        | N       | Y   | N   | N       | N       | N      | N    | N     | N    | N     | N        | N       |
| 196 | 2        | N       | N   | N   | N       | Y       | N      | N    | N     | N    | N     | N        | N       |
| 197 | 3        | N       | N   | N   | N       | N       | N      | N    | Y     | N    | N     | N        | N       |
| 198 | 2        | N       | N   | N   | N       | Y       | N      | N    | N     | N    | N     | N        | N       |
| 199 | 5        |         |     |     |         |         |        |      |       |      |       |          |         |
| 200 | 2        | N       | Y   | N   | N       | N       | N      | N    | N     | N    | N     | N        | N       |
| 201 | 2        | Y       |     |     |         |         |        |      |       |      |       |          |         |
| 202 | 2        |         |     |     |         | Y       |        |      |       |      |       |          |         |
| 203 | 2        |         |     |     |         | Y       |        |      |       |      |       |          |         |
| 204 | 2        |         |     |     |         | Y       |        |      |       |      |       |          |         |



| ID  | MEDEDUCA | WESTMED | CTM | WCM | PREVENT | NURSING | MEDLAB | ORAL | PHARM | GPAE | REHAB | HEALTHMA | OTHERAE |
|-----|----------|---------|-----|-----|---------|---------|--------|------|-------|------|-------|----------|---------|
| 239 | 2        | N       | N   | N   | N       | Y       | N      | N    | N     | N    | N     | N        |         |
| 240 | 3        | Y       | N   | N   | N       | N       | N      | N    | N     | N    | N     | N        |         |
| 241 | 2        | N       | N   | N   | N       | Y       | N      | N    | N     | N    | N     | N        |         |
| 242 | 3        | Y       | N   | N   | N       | N       | N      | N    | N     | N    | N     | N        |         |
| 243 | 1        | N       | N   | N   | N       | Y       | N      | N    | N     | N    | N     | N        |         |
| 244 | 2        | N       | N   | N   | N       | Y       | N      | N    | N     | N    | N     | N        |         |
| 245 | 3        | N       | N   | Y   | N       | N       | N      | N    | N     | N    | N     | N        |         |
| 246 | 3        | Y       | N   | N   | N       | N       | N      | N    | N     | Y    | N     | N        |         |
| 247 | 1        | N       | N   | N   | N       | N       | N      | N    | N     | N    | N     |          |         |
| 248 | 2        | Y       | N   | N   | N       | N       | N      | N    | N     | N    | N     | N        |         |
| 249 | 3        |         |     |     |         |         |        |      | Y     |      |       |          |         |
| 250 | 2        | Y       |     |     |         |         |        |      |       |      |       |          |         |
| 251 | 2        | Y       |     |     |         |         |        |      |       |      |       |          |         |
| 252 | 1        | Y       |     |     |         |         |        |      |       |      |       |          |         |
| 253 | 2        |         |     |     |         |         |        |      | Y     |      |       |          |         |
| 254 | 2        | Y       |     |     |         |         |        |      |       |      |       |          |         |
| 255 | 3        | Y       |     |     |         |         |        |      |       | Y    |       |          |         |
| 256 | 2        | N       | N   | N   | N       | Y       | N      | N    | N     | N    | N     | N        |         |
| 257 | 1        | N       | N   | N   | N       | N       | N      | N    | Y     | N    | N     | N        |         |
| 258 | 2        | N       | N   | N   | N       | Y       | N      | N    | N     | N    | N     | N        |         |
| 259 | 2        | N       | N   | N   | N       | Y       | N      | N    | N     | N    | N     | N        |         |
| 260 | 3        | N       | Y   | N   | Y       | N       | N      | N    | N     | N    | N     | N        |         |
| 261 | 3        | N       | N   | N   | Y       | N       | N      | N    | N     | N    | N     | N        |         |
| 262 | 3        | N       | N   | N   | N       | Y       | N      | N    | N     | N    | N     | N        |         |
| 263 | 3        | N       | N   | N   | Y       | N       | N      | N    | N     | N    | N     | N        |         |
| 264 | 3        | N       | N   | N   | N       | Y       | N      | N    | N     | N    | N     | N        |         |
| 265 | 2        | N       | N   | N   | N       | Y       | N      | N    | N     | N    | N     | N        |         |
| 266 | 2        | N       | N   | N   | N       | Y       | N      | N    | N     | N    | N     | N        |         |
| 267 | 3        | Y       | N   | N   | N       | N       | N      | N    | N     | N    | N     | N        |         |
| 268 | 2        | N       | N   | N   | N       | Y       | N      | N    | N     | N    | N     | N        |         |
| 269 | 3        | Y       | N   | N   | N       | N       | N      | N    | N     | N    | N     | N        |         |
| 270 | 3        | Y       | N   | N   | N       | N       | N      | N    | N     | N    | N     | N        |         |
| 271 | 2        | N       | N   | N   | Y       | N       | N      | N    | N     | N    | N     | N        |         |
| 272 | 3        | N       | N   | N   | N       | Y       | N      | N    | N     | N    | N     | N        |         |







| ID  | MEDEDUCA | WESTMED | CTM | WCM | PREVENT | NURSING | MEDLAB | ORAL | PHARM | GPAE | REHAB | HEALTHMA | OTHERAE |
|-----|----------|---------|-----|-----|---------|---------|--------|------|-------|------|-------|----------|---------|
| 375 | 3        | N       | Y   | Y   | N       | N       | N      | N    | N     | N    | N     | N        | N       |
| 376 | 5        |         |     |     |         |         |        |      |       |      |       |          |         |
| 377 | 2        | Y       | N   | Y   | N       | N       | N      | N    | N     | N    | N     | N        | N       |
| 378 | 4        | N       | Y   | N   | N       | N       | N      | N    | N     | N    | N     | N        | Y       |
| 379 | 3        | N       | Y   | N   | N       | N       | N      | N    | N     | N    | N     | N        | N       |
| 380 | 2        | N       | N   | N   | N       | Y       | N      | N    | N     | N    | N     | N        | N       |
| 381 | 3        | N       | N   | N   | N       | Y       | N      | N    | N     | N    | N     | N        | N       |
| 382 | 1        | N       | N   | N   | N       | N       | Y      | N    | N     | N    | N     | N        | N       |
| 383 | 3        | N       | N   | N   | N       | N       | N      | N    | Y     | N    | N     | N        | N       |
| 384 | 2        | N       | N   | N   | N       | Y       | N      | N    | N     | N    | N     | N        |         |
| 385 | 1        | N       | N   | N   | N       | Y       | N      | N    | N     | N    | N     | N        |         |
| 386 | 2        | N       | N   | N   | N       | Y       | N      | N    | N     | N    | N     | N        |         |
| 387 | 1        | N       | N   | N   | N       | Y       | N      | N    | N     | N    | N     | N        |         |
| 388 | 2        | N       | N   | N   | N       | N       | N      | N    | N     | Y    | N     | N        |         |
| 389 | 2        | N       | Y   | N   | N       | N       | N      | N    | N     | N    | N     | N        |         |
| 390 | 3        | Y       | N   | N   | N       | N       | N      | N    | N     | N    | N     | N        |         |
| 391 | 3        | Y       | Y   | N   | N       | N       | N      | N    | N     | N    | N     | N        |         |
| 392 | 2        |         | N   | N   | N       | N       | Y      | N    | N     | N    | N     | N        |         |
| 393 | 1        | N       | N   | N   | N       | Y       | N      | N    | N     | N    | N     | N        |         |
| 394 | 2        | N       | N   | N   | N       | Y       | N      | N    | N     | N    | N     | N        |         |
| 395 | 2        | N       | N   | N   | N       | Y       | N      | N    | N     | N    | N     | N        |         |
| 396 | 2        | N       | N   | N   | N       | Y       | N      | N    | N     | N    | N     | N        |         |
| 397 | 3        | N       | N   | N   | N       | N       | N      | N    | Y     | N    | N     | N        |         |
| 398 | 3        | N       | N   | N   | N       | Y       | N      | N    | N     | N    | N     | N        |         |
| 399 | 2        | N       | N   | N   | N       | Y       | N      | N    | N     | N    | N     | N        |         |
| 400 | 2        | N       | N   | N   | N       | N       | N      | N    | Y     | N    | N     | N        |         |
| 401 | 2        | N       | N   | N   | N       | Y       | N      | N    | N     | N    | N     | N        |         |
| 402 | 3        | N       | N   | Y   | N       | N       | N      | N    | N     | N    | N     | N        |         |
| 403 | 2        | N       | N   | N   | N       | Y       | N      | N    | N     | N    | N     | N        |         |
| 404 | 2        | N       | N   | N   | N       | Y       | N      | N    | N     | Y    | N     | N        |         |
| 405 | 2        | Y       | N   | N   | N       | N       | N      | N    | N     | Y    | N     | N        |         |
| 406 | 2        | N       | N   | N   | N       | Y       | N      | N    | N     | N    | N     | N        |         |
| 407 | 2        | N       | N   | N   | N       | N       | Y      | N    | N     | N    | N     | N        |         |
| 408 | 2        | N       | N   | N   | N       | Y       | N      | N    | N     | N    | N     | N        |         |





| ID  | MEDEDUCA | WESTMED | CTM | WCM | PREVENT | NURSING | MEDLAB | ORAL | PHARM | GPAE | REHAB | HEALTHMA | OTHERAE |
|-----|----------|---------|-----|-----|---------|---------|--------|------|-------|------|-------|----------|---------|
| 443 | 2        | Y       |     |     |         |         |        |      |       |      |       |          |         |
| 444 | 3        | N       | N   | N   | N       | Y       | N      | N    | N     | N    | N     | N        | N       |
| 445 | 3        | N       | N   | N   | N       | N       | N      | N    | Y     | N    | N     | N        | N       |
| 446 | 2        | N       | Y   | N   | N       | N       | N      | N    | N     | N    | N     | N        | N       |
| 447 | 3        | N       | N   | N   | N       | Y       | N      | N    | N     | N    | N     | N        | N       |
| 448 | 3        | N       | N   | N   | N       | N       | N      | N    | Y     | N    | N     | N        | N       |
| 449 | 4        | N       | N   | N   | Y       | N       | N      | N    | N     | N    | N     | N        | N       |
| 450 | 3        | N       | Y   | Y   | N       | N       | N      | N    | N     | N    | N     | N        | N       |
| 451 | 2        | N       | N   | N   | N       | Y       | N      | N    | N     | N    | N     | N        | N       |
| 452 | 5        | N       | N   | N   | N       | N       | N      | N    | Y     | N    | N     | N        | N       |
| 453 | 2        | N       | N   | N   | N       | N       | Y      | N    | N     | N    | N     | N        | N       |
| 454 | 4        | Y       | N   | N   | N       | N       | N      | N    | N     | N    | N     | N        | N       |
| 455 | 1        | N       | N   | N   | N       | Y       | N      | N    | N     | N    | N     | N        |         |
| 456 | 2        | N       | N   | N   | N       | Y       | N      | N    | N     | N    | N     | N        |         |
| 457 | 2        | N       | N   | N   | N       | Y       | N      | N    | N     | N    | N     | N        |         |
| 458 | 2        | N       | N   | N   | N       | N       | N      | N    | N     | Y    | N     | N        |         |
| 459 | 5        | N       | N   | N   | N       | N       | N      | N    | N     | N    | N     | Y        |         |
| 460 | 2        | Y       | Y   | N   | N       | N       | N      | N    | N     | Y    | N     | N        |         |
| 461 | 1        | N       | N   | N   | N       | Y       | N      | N    | N     | N    | N     | N        |         |
| 462 | 1        | N       | N   | N   | N       | N       | N      | N    | Y     | N    | N     | N        |         |
| 463 | 5        | N       | N   | N   | N       | Y       | N      | N    | N     | N    | N     | N        |         |
| 464 | 1        | N       | N   | N   | N       | Y       | N      | N    | N     | N    | N     | N        |         |
| 465 | 1        | N       | Y   | N   | N       | N       | N      | N    | N     | N    | N     | N        |         |
| 466 | 2        | N       | Y   | N   | N       | N       | N      | N    | N     | N    | N     | N        | N       |
| 467 | 2        | N       | N   | N   | N       | Y       | N      | N    | N     | N    | N     | N        | N       |
| 468 | 2        | N       | N   | N   | N       | N       | N      | N    | Y     | N    | N     | N        | N       |
| 469 | 3        | Y       | N   | N   | N       | Y       | N      | N    | N     | N    | N     | N        | N       |
| 470 | 1        | N       | N   | N   | N       | Y       | N      | N    | N     | N    | N     | N        | N       |
| 471 | 3        | Y       | N   | Y   | N       | N       | N      | N    | N     | N    | N     | N        | N       |
| 472 | 3        | N       | N   | N   | N       | Y       | N      | N    | N     | N    | N     | N        |         |
| 473 | 2        | N       | N   | N   | N       | N       | N      | N    | N     | N    | Y     | N        |         |
| 474 | 2        | Y       | N   | N   | N       | N       | N      | N    | N     | N    | N     | N        |         |
| 475 | 2        | N       | Y   | Y   | N       | N       | N      | N    | N     | N    | N     | N        |         |
| 476 | 2        | Y       | N   | N   | N       | Y       | N      | N    | N     | N    | N     | N        |         |

| ID  | MEDEDUCA | WESTMED | CTM | WCM | PREVENT | NURSING | MEDLAB | ORAL | PHARM | GPAE | REHAB | HEALTHMA | OTHERAE |
|-----|----------|---------|-----|-----|---------|---------|--------|------|-------|------|-------|----------|---------|
| 477 | 3        | N       | N   | N   | N       | N       | N      | N    | N     | N    | Y     | N        |         |
| 478 | 2        | N       | N   | N   | N       | Y       | N      | N    | N     | N    | N     | N        |         |
| 479 | 2        | N       | N   | N   | N       | Y       | N      | N    | N     | N    | N     | N        |         |
| 480 | 2        | N       | Y   | N   | N       | N       | N      | N    | N     | N    | N     | N        |         |
| 481 | 2        | N       | N   | N   | N       | N       | Y      | N    | N     | N    | N     | N        |         |
| 482 | 3        | N       | Y   | N   | N       | N       | N      | N    | N     | N    | N     | N        |         |
| 483 | 2        | N       | N   | N   | N       | Y       | N      | N    | N     | N    | N     | N        |         |
| 484 | 2        | Y       | N   | N   | N       | N       | N      | N    | N     | N    | N     | N        |         |
| 485 | 2        | N       | N   | N   | N       | Y       | N      | N    | N     | N    | N     | N        |         |
| 486 | 1        | N       | N   | N   | N       | Y       | N      | N    | N     | N    | N     | N        |         |
| 487 | 2        | N       | N   | N   | N       | Y       | N      | N    | N     | N    | N     | N        |         |
| 488 | 2        | Y       | Y   | N   | N       | N       | N      | N    | N     | N    | N     | N        |         |
| 489 | 2        | Y       | N   | N   | N       | N       | N      | N    | N     | N    | N     | N        |         |
| 490 | 1        | N       | N   | N   | N       | N       | Y      | N    | N     | N    | N     | N        |         |
| 491 | 1        | Y       | N   | N   | N       | N       | N      | N    | N     | N    | N     | N        |         |
| 492 | 1        | N       | N   | N   | N       | Y       | N      | N    | N     | N    | N     | N        |         |
| 493 | 1        | Y       | N   | N   | N       | N       | N      | N    | N     | N    | N     | N        |         |
| 494 | 1        | N       | Y   | N   | N       | N       | N      | N    | N     | N    | N     | N        |         |
| 495 | 3        | N       | Y   | N   | N       | N       | N      | N    | N     | N    | N     | N        |         |
| 496 | 3        | N       | N   | Y   | N       | N       | N      | N    | N     | N    | N     | N        |         |
| 497 | 3        | N       | N   | N   | N       | N       | N      | N    | Y     | N    | N     | N        | N       |
| 498 | 2        | Y       | N   | N   | N       | N       | N      | N    | N     | N    | N     | N        | N       |
| 499 | 2        | N       | N   | N   | N       | Y       | N      | N    | N     | N    | N     | N        | N       |
| 500 | 3        | N       | N   | N   | N       | Y       | N      | N    | N     | N    | N     | N        | N       |
| 501 | 3        | N       | N   | N   | N       | Y       | N      | N    | N     | N    | N     | N        | N       |
| 502 | 2        | N       | N   | N   | N       | N       | Y      | N    | N     | N    | N     | N        | N       |
| 503 | 3        | Y       | N   | N   | N       | N       | N      | N    | N     | N    | N     | N        | N       |
| 504 | 1        | N       | N   | N   | N       | Y       | N      | N    | N     | N    | N     | N        |         |
| 505 | 2        | N       | N   | N   | N       | N       | N      | N    | N     | N    | Y     | N        |         |
| 506 | 2        | N       | N   | N   | N       | Y       | N      | N    | N     | N    | N     | N        |         |
| 507 | 2        | N       | Y   | N   | N       | N       | N      | N    | N     | N    | N     | N        |         |
| 508 | 2        |         |     |     |         |         |        |      |       |      |       |          |         |
| 509 | 2        | N       | N   | N   | N       | Y       | N      | N    | N     | N    | N     | N        |         |
| 510 | 2        | Y       | N   | N   | N       | N       | N      | N    | N     | Y    | N     | N        |         |

| ID  | MEDEDUCA | WESTMED | CTM | WCM | PREVENT | NURSING | MEDLAB | ORAL | PHARM | GPAE | REHAB | HEALTHMA | OTHERAE |
|-----|----------|---------|-----|-----|---------|---------|--------|------|-------|------|-------|----------|---------|
| 511 | 2        | N       | N   | N   | N       | N       | Y      | N    | N     | N    | N     | N        |         |
| 512 | 2        | N       | N   | N   | N       | Y       | N      | N    | N     | Y    | N     | N        |         |
| 513 | 3        | N       | Y   | N   | N       | N       | N      | N    | N     | N    | N     | N        |         |
| 514 | 1        | N       | N   | N   | N       | Y       | N      | N    | N     | N    | N     | N        |         |
| 515 | 2        | N       | N   | N   | N       | Y       | N      | N    | N     | N    | N     | N        |         |
| 516 | 5        | N       | N   | N   | N       | N       | N      | N    | N     | N    | N     | N        | Y       |
| 517 | 1        | Y       | N   | N   | N       | N       | N      | N    | N     | N    | N     | N        |         |
| 518 | 5        |         |     |     |         |         |        |      |       |      |       |          |         |
| 519 | 2        | N       | N   | Y   | N       | N       | N      | N    | N     | N    | Y     | N        |         |
| 520 | 1        | N       | N   | Y   | N       | N       | N      | N    | N     | N    | N     | N        |         |
| 521 | 2        | N       | N   | N   | N       | N       | Y      | N    | N     | N    | N     | N        |         |
| 522 | 5        |         |     |     |         |         |        |      |       |      |       |          |         |
| 523 | 1        | N       | N   | N   | N       | N       | N      | N    | Y     | N    | N     | N        |         |
| 524 | 2        | N       | N   | N   | N       | Y       | N      | N    | N     | N    | N     | N        |         |
| 525 | 3        | N       | N   | N   | N       | Y       | N      | N    | N     | N    | N     | N        |         |
| 526 | 1        | N       | N   | N   | Y       | N       | N      | N    | N     | N    | N     | N        |         |
| 527 | 3        | N       | N   | N   | N       | N       | Y      | N    | N     | N    | N     | N        |         |
| 528 | 1        | N       | N   | N   | N       | Y       | N      | N    | N     | N    | N     | N        |         |
| 529 | 3        | N       | Y   | N   | N       | N       | N      | N    | N     | N    | N     | N        |         |
| 530 | 3        | N       | N   | N   | N       | Y       | N      | N    | Y     | N    | N     | N        |         |
| 531 | 2        | N       | N   | N   | N       | N       | N      | N    | Y     | N    | N     | N        |         |
| 532 | 2        | Y       | N   | N   | N       | N       | N      | N    | N     | N    | N     | N        |         |
| 533 | 2        | N       | N   | N   | N       | Y       | N      | N    | N     | N    | N     | N        |         |
| 534 | 3        | N       | N   | N   | N       | Y       | N      | N    | N     | N    | N     | N        |         |
| 535 | 2        | N       | N   | N   | N       | N       | N      | N    | N     | Y    | N     | N        |         |
| 536 | 1        | Y       | N   | N   | N       | N       | N      | N    | N     | N    | N     | N        |         |
| 537 | 3        | Y       | N   | Y   | N       | N       | N      | N    | N     | N    | N     | N        |         |
| 538 | 3        | N       | N   | N   | N       | Y       | N      | N    | N     | N    | N     | N        |         |
| 539 | 2        | Y       | N   | N   | N       | N       | N      | N    | N     | Y    | N     | N        |         |
| 540 | 5        | N       | N   | N   | N       | N       | N      | N    | N     | N    | N     | N        |         |
| 541 | 1        | N       | Y   | N   | N       | N       | N      | N    | N     | N    | N     | N        |         |
| 542 | 2        | N       | N   | Y   | N       | N       | N      | N    | N     | N    | N     | N        |         |
| 543 | 3        | N       | N   | N   | N       | Y       | N      | N    | N     | N    | N     | N        |         |
| 544 | 2        | N       | N   | N   | N       | N       | Y      | N    | N     | N    | N     | N        |         |



| ID  | MEDEDUCA | WESTMED | CTM | WCM | PREVENT | NURSING | MEDLAB | ORAL | PHARM | GPAE | REHAB | HEALTHMA | OTHERAE |
|-----|----------|---------|-----|-----|---------|---------|--------|------|-------|------|-------|----------|---------|
| 579 | 2        | N       | N   | N   | Y       | N       | N      | N    | N     | N    | N     | N        |         |
| 580 | 2        |         |     |     |         |         |        |      | Y     |      |       |          |         |
| 581 | 3        |         |     |     |         |         |        |      | Y     |      |       |          |         |
| 582 | 3        | Y       |     |     |         |         |        |      |       |      |       |          |         |
| 583 | 3        | Y       |     | Y   |         |         |        |      |       |      |       |          |         |
| 584 | 3        |         |     |     | Y       |         |        |      |       |      |       |          |         |
| 585 | 3        |         |     |     |         |         |        | Y    |       |      |       |          |         |
| 586 | 2        |         |     |     |         | Y       |        |      |       |      |       |          |         |
| 587 | 2        |         |     |     |         | Y       |        |      |       |      |       |          |         |
| 588 | 2        |         |     |     |         | Y       |        |      |       |      |       |          |         |
| 589 | 3        |         |     |     |         | Y       |        |      |       |      |       |          |         |
| 590 | 2        |         |     |     |         |         | Y      |      |       |      |       |          |         |
| 591 | 3        | Y       |     |     |         |         |        |      |       |      |       |          |         |
| 592 | 5        |         |     |     |         |         |        |      |       |      |       |          |         |
| 593 | 2        |         |     |     |         | Y       |        |      |       |      |       |          |         |
| 594 | 1        |         |     |     |         |         |        |      |       | Y    |       |          |         |
| 595 | 2        |         |     |     |         | Y       |        |      |       |      |       |          |         |
| 596 | 3        |         |     | Y   |         |         |        |      |       |      |       |          |         |
| 597 | 1        |         |     |     |         |         |        |      | Y     |      |       |          |         |
| 598 | 2        |         |     |     |         | Y       |        |      |       |      |       |          |         |
| 599 | 2        |         |     | Y   |         |         |        |      |       |      |       |          |         |
| 600 | 2        |         |     |     |         | Y       |        |      |       |      |       |          |         |
| 601 | 2        |         |     |     |         | Y       |        |      |       |      |       |          |         |
| 602 | 2        | Y       |     |     |         |         |        |      |       |      |       |          |         |
| 603 | 3        |         |     |     |         | Y       |        |      |       |      |       |          |         |
| 604 | 3        | Y       |     |     |         |         |        |      |       |      |       |          |         |
| 605 | 2        |         |     |     |         | Y       |        |      |       |      |       |          |         |
| 606 | 3        | Y       |     |     |         |         |        |      |       |      |       |          |         |
| 607 | 3        |         |     |     |         | Y       |        |      |       |      |       |          |         |
| 608 | 3        |         |     |     |         | Y       |        |      |       |      |       |          |         |
| 609 | 2        |         |     |     |         | Y       |        |      |       |      |       |          |         |
| 610 | 2        |         |     |     |         | Y       |        |      |       |      |       |          |         |
| 611 | 1        |         |     |     |         | Y       |        |      |       |      |       |          |         |
| 612 | 3        | Y       |     |     |         |         |        |      |       | Y    |       |          |         |

| ID  | MEDEDUCA | WESTMED | CTM | WCM | PREVENT | NURSING | MEDLAB | ORAL | PHARM | GPAE | REHAB | HEALTHMA | OTHERAE |
|-----|----------|---------|-----|-----|---------|---------|--------|------|-------|------|-------|----------|---------|
| 613 | 3        | Y       |     |     |         |         |        |      |       |      |       |          |         |
| 614 | 1        | Y       |     |     |         |         |        |      |       |      |       |          |         |
| 615 | 2        |         | Y   |     |         |         |        |      |       | Y    |       |          |         |
| 616 | 3        |         |     |     |         | Y       |        |      |       |      |       |          |         |
| 617 | 3        | Y       |     |     |         |         |        |      |       | Y    |       |          |         |
| 618 | 3        |         |     |     |         | Y       |        |      |       |      |       |          |         |
| 619 | 3        | Y       |     |     |         |         |        |      |       |      |       |          |         |
| 620 | 1        | N       | N   | N   | N       | Y       | N      | N    | N     | N    | N     | N        |         |
| 621 | 5        |         |     |     |         |         |        |      |       |      |       |          |         |
| 622 | 2        | Y       | N   | N   | N       | N       | N      | N    | N     | N    | N     | N        |         |
| 623 | 3        | N       | Y   | N   | N       | N       | N      | N    | N     | N    | N     | N        |         |
| 624 | 2        | N       | N   | N   | N       | Y       | N      | N    | N     | N    | N     | N        |         |
| 625 | 1        | N       | N   | N   | N       | Y       | N      | N    | N     | N    | N     | N        |         |
| 626 | 3        |         |     |     |         |         |        |      |       |      |       |          |         |
| 627 | 2        | N       | N   | N   | N       | Y       | N      | N    | N     | N    | N     | N        |         |
| 628 | 1        |         |     |     |         |         |        |      |       |      |       |          |         |
| 629 | 3        | Y       | N   | N   | N       | N       | N      | N    | N     | N    | N     | N        |         |
| 630 | 1        | N       | N   | N   | N       | Y       | N      | N    | N     | N    | N     | N        |         |
| 631 | 1        | N       | N   | N   | N       | Y       | N      | N    | N     | N    | N     | N        |         |
| 632 | 1        | N       | N   | N   | N       | Y       | N      | N    | N     | N    | N     | N        |         |
| 633 | 1        | Y       | N   | N   | N       | N       | N      | N    | N     | N    | N     | N        |         |
| 634 | 3        | Y       | N   | N   | N       | N       | N      | N    | N     | N    | N     | N        |         |
| 635 | 2        | Y       | N   | N   | N       | N       | N      | N    | N     | N    | N     | N        |         |
| 636 | 2        | Y       | N   | N   | N       | N       | N      | Y    | N     | N    | N     | N        |         |
| 637 | 2        | N       | Y   | N   | N       | N       | N      | N    | N     | Y    | N     | N        |         |
| 638 | 3        | Y       | N   | N   | N       | N       | N      | N    | N     | N    | N     | N        |         |
| 639 | 2        | Y       | N   | Y   | N       | N       | N      | N    | N     | Y    | N     | N        |         |
| 640 | 2        | N       | Y   | Y   | N       | N       | N      | N    | N     | N    | Y     | N        |         |
| 641 | 2        | Y       | N   | N   | N       | N       | N      | N    | N     | Y    | N     | N        |         |
| 642 | 2        | N       | N   | N   | N       | N       | Y      | N    | N     | N    | N     | N        |         |
| 643 | 3        | N       | Y   | N   | N       | N       | N      | N    | N     | Y    | N     | N        |         |
| 644 | 3        | Y       | N   | N   | N       | N       | N      | N    | N     | N    | N     | N        |         |
| 645 | 2        | Y       | N   | N   | N       | N       | N      | N    | N     | N    | N     | N        |         |
| 646 | 2        | Y       | N   | N   | N       | N       | Y      | N    | N     | N    | N     | N        |         |





| ID | genjs_1 | LEAVE_1 | INCM_1 | BENEFIT_1 | LRN_1 | CAREER_1 | PEERRELA | RESPECTS | SECURE_1 | PARTIRES | HONOR_1 | INCOME5 | BENEFIT5 |
|----|---------|---------|--------|-----------|-------|----------|----------|----------|----------|----------|---------|---------|----------|
| 1  | 3       | 4       | 3      | 3         | 3     | 3        | 5        | 3        | 4        | 4        | 3       | 4.5     | 4.5      |
| 2  | 3       | 2       | 3      | 4         | 4     | 3        | 4        | 3        | 4        | 2        | 3       | 3.5     | 3.5      |
| 3  | 3       | 2       | 3      | 3         | 4     | 3        | 4        | 4        | 3        | 3        | 3       | 4       | 3        |
| 4  | 4       | 3       | 3      | 3         | 4     | 3        | 5        | 4        | 4        | 4        | 3       | 5       | 4.5      |
| 5  | 4       | 3       | 3      | 4         | 4     | 4        | 5        | 5        | 4        | 4        | 4       | 1.5     | 1.5      |
| 6  | 3       | 2       | 2      | 2         | 4     | 3        | 4        | 4        | 3        | 1        | 5       | 2.5     | 3.5      |
| 7  | 4       | 3       | 3      | 3         | 3     | 3        | 4        | 5        | 4        | 3        | 4       | 4       | 2.5      |
| 8  | 5       | 1       | 4      | 4         | 4     | 5        | 5        | 5        | 4        | 5        | 5       | 5       | 4.5      |
| 9  | 4       | 3       | 1      | 2         | 3     | 4        | 4        | 4        | 4        | 4        | 4       | 3.5     | 4        |
| 10 | 3       | 3       | 2      | 2         | 2     | 1        | 4        | 4        | 3        | 2        | 3       | 5       | 5        |
| 11 | 4       | 2       | 3      | 3         | 3     | 3        | 5        | 4        | 4        | 2        | 3       | 5       | 5        |
| 12 | 4       | 2       | 4      | 4         | 4     | 4        | 5        | 4        | 4        | 4        | 5       | 4       | 4        |
| 13 | 4       | 2       | 2      | 3         | 3     | 3        | 4        | 4        | 4        | 3        | 3       | 4.5     | 4.5      |
| 14 | 3       | 2       | 3      | 4         | 4     | 3        | 4        | 3        | 4        | 2        | 3       | 2.5     | 2        |
| 15 | 3       | 2       | 2      | 1         | 5     | 1        | 4        | 4        | 3        | 1        | 5       | 5       | 5        |
| 16 | 3       | 2       | 2      | 3         | 3     | 2        | 2        | 4        | 3        | 2        | 3       | 4       | 4        |
| 17 | 4       | 3       | 1      | 3         | 4     | 3        | 4        | 4        | 4        | 4        | 4       | 4       | 3        |
| 18 | 3       | 2       | 3      | 3         | 4     | 3        | 4        | 4        | 3        | 3        | 3       | 3.5     | 3        |
| 19 | 2       | 3       | 2      | 3         | 2     | 3        | 4        | 4        | 4        | 4        | 3       | 2       | 2        |
| 20 | 4       | 2       | 2      | 3         | 3     | 3        | 4        | 5        | 3        | 4        | 3       | 5       | 5        |
| 21 | 3       | 3       | 3      | 2         | 3     | 2        | 5        | 3        | 3        | 2        | 2       | 1       | 1        |
| 22 | 3       | 3       | 3      | 1         | 3     | 2        | 5        | 3        | 3        | 2        | 2       | 2       | 1        |
| 23 | 4       | 4       | 4      | 4         | 4     | 4        | 4        | 4        | 4        | 4        | 4       | 3       | 3        |
| 24 | 4       | 4       | 4      | 4         | 4     | 4        | 4        | 4        | 4        | 4        | 4       | 4       | 2.5      |
| 25 | 3       | 3       | 2      | 2         | 2     | 2        | 4        | 4        | 4        | 3        | 3       | 5       | 5        |
| 26 | 3       | 2       | 2      | 2         | 4     | 3        | 4        | 4        | 4        | 2        | 3       | 3       | 4.5      |
| 27 | 3       | 4       | 2      | 3         | 3     | 2        | 4        | 3        | 3        | 4        | 3       | 5       | 5        |
| 28 | 3       | 3       | 3      | 2         | 3     | 2        | 4        | 3        | 2        | 3        | 3       | 5       | 5        |
| 29 | 3       | 2       | 3      | 3         | 3     | 2        | 4        | 4        | 5        | 3        | 4       | 3       | 3        |
| 30 | 3       | 3       | 2      | 3         | 3     | 3        | 4        | 2        | 4        | 1        | 3       | 5       | 5        |
| 31 | 3       | 4       | 4      | 3         | 3     | 3        | 3        | 3        | 4        | 4        | 3       | 4.5     | 4        |
| 32 | 4       | 2       | 3      | 3         | 3     | 3        | 4        | 3        | 3        | 4        | 3       | 3       | 3        |
| 33 | 4       | 1       | 1      | 3         | 3     | 3        | 4        | 4        | 4        | 3        | 3       | 4       | 4.5      |
| 34 | 4       | 2       | 3      | 3         | 4     | 3        | 4        | 4        | 4        | 3        | 4       | 5       | 5        |

| ID | genjs_1 | LEAVE_1 | INCM_1 | BENEFIT_1 | LRN_1 | CAREER_1 | PEERRELA | RESPECTS | SECURE_1 | PARTIRES | HONOR_1 | INCOME5 | BENEFIT5 |
|----|---------|---------|--------|-----------|-------|----------|----------|----------|----------|----------|---------|---------|----------|
| 35 | 4       | 2       | 2      | 3         | 3     | 3        | 4        | 4        | 3        | 4        | 4       | 5       | 5        |
| 36 | 3       | 3       | 3      | 2         | 3     | 3        | 4        | 3        | 3        | 4        | 3       | 5       | 5        |
| 37 | 3       | 3       | 3      | 3         | 3     | 3        | 3        | 3        | 4        | 4        | 3       | 3       | 2.5      |
| 38 | 4       | 3       | 3      | 3         | 5     | 4        | 5        | 4        | 4        | 4        | 4       | 3.5     | 3.5      |
| 39 | 3       | 2       | 3      | 3         | 3     | 3        | 4        | 3        | 4        | 4        | 3       | 4.5     | 5        |
| 40 | 4       | 3       | 3      | 4         | 3     | 3        | 4        | 4        | 3        | 4        | 3       | 4       | 4        |
| 41 | 4       | 2       | 3      | 4         | 4     | 3        | 4        | 4        | 4        | 3        | 3       | 5       | 5        |
| 42 | 3       | 3       | 3      | 3         | 3     | 4        | 4        | 4        | 4        | 4        | 4       | 5       | 5        |
| 43 | 4       | 2       | 3      | 4         | 4     | 4        | 5        | 4        | 4        | 4        | 4       | 5       | 5        |
| 44 | 4       | 3       | 2      | 3         | 3     | 3        | 4        | 4        | 4        | 3        | 3       | 3       | 2.5      |
| 45 | 3       | 4       | 1      | 1         | 1     | 1        | 5        | 1        | 2        | 1        | 3       | 4       | 2.5      |
| 46 | 4       | 2       | 3      | 3         | 3     | 3        | 4        | 4        | 3        | 4        | 3       | 4.5     | 4.5      |
| 47 | 3       | 3       | 3      | 3         | 3     | 2        | 4        | 3        | 3        | 3        | 3       | 5       | 5        |
| 48 | 4       | 1       | 3      | 1         | 4     | 3        | 5        | 5        | 4        | 1        | 3       | 5       | 5        |
| 49 | 5       | 1       | 4      | 5         | 4     | 3        | 4        | 4        | 3        | 4        | 3       | 4       | 5        |
| 50 | 5       | 2       | 3      | 5         | 4     | 3        | 5        | 4        | 5        | 4        | 4       | 5       | 5        |
| 51 | 4       | 3       | 3      | 3         | 3     | 3        | 4        | 4        | 3        | 3        | 4       | 5       | 4.5      |
| 52 | 3       | 3       | 3      | 3         | 2     | 3        | 4        | 3        | 4        | 3        | 3       | 5       | 5        |
| 53 | 4       | 3       | 3      | 3         | 4     | 3        | 4        | 4        | 4        | 2        | 4       | 5       | 4.5      |
| 54 | 4       | 2       | 3      | 3         | 4     | 3        | 4        | 4        | 4        | 4        | 3       | 3.5     | 2.5      |
| 55 | 4       | 3       | 3      | 4         | 4     | 3        | 5        | 5        | 4        | 5        | 4       | 5       | 5        |
| 56 | 4       | 2       | 3      | 3         | 3     | 3        | 3        | 4        | 4        | 4        | 3       | 3.5     | 3.5      |
| 57 | 4       | 2       | 3      | 3         | 3     | 3        | 4        | 4        | 4        | 3        | 3       | 4.5     | 4.5      |
| 58 | 4       | 4       | 3      | 2         | 4     | 3        | 5        | 4        | 4        | 5        | 3       | 3       | 3.5      |
| 59 | 3       | 2       | 2      | 3         | 3     | 3        | 4        | 3        | 4        | 3        | 3       | 2.5     | 1.5      |
| 60 | 2       | 2       | 2      | 3         | 2     | 3        | 4        | 4        | 5        | 2        | 2       | 5       | 4        |
| 61 | 3       | 2       | 3      | 3         | 3     | 3        | 4        | 4        | 4        | 4        | 4       | 5       | 5        |
| 62 | 4       | 3       | 3      | 3         | 3     | 3        | 5        | 3        | 3        | 4        | 4       | 5       | 4.5      |
| 63 | 4       | 3       | 3      | 3         | 3     | 3        | 4        | 4        | 4        | 4        | 4       | 4       | 5        |
| 64 | 4       | 2       | 3      | 3         | 5     | 4        | 4        | 4        | 4        | 4        | 3       | 2.5     | 2.5      |
| 65 | 3       | 3       | 3      | 3         | 3     | 3        | 4        | 3        | 3        | 2        | 3       | 0.5     | 1        |
| 66 | 4       | 3       | 3      | 4         | 4     | 3        | 5        | 4        | 4        | 4        | 4       | 4.5     | 4.5      |
| 67 | 5       | 1       | 3      | 4         | 4     | 4        | 5        | 5        | 4        | 5        | 5       | 4       | 3.5      |
| 68 | 4       | 2       | 4      | 3         | 3     | 2        | 5        | 5        | 5        | 2        | 3       | 3       | 3.5      |

| ID  | genjs_1 | LEAVE_1 | INCM_1 | BENEFIT_1 | LRN_1 | CAREER_1 | PEERRELA | RESPECTS | SECURE_1 | PARTIRES | HONOR_1 | INCOME5 | BENEFIT5 |
|-----|---------|---------|--------|-----------|-------|----------|----------|----------|----------|----------|---------|---------|----------|
| 69  | 3       | 2       | 2      | 2         | 4     | 2        | 4        | 5        | 3        | 3        | 4       | 4       | 5        |
| 70  | 4       | 1       | 3      | 2         | 2     | 2        | 5        | 5        | 3        | 4        | 2       | 3.5     | 3.5      |
| 71  | 4       | 4       | 3      | 3         | 4     | 3        | 4        | 4        | 3        | 4        | 3       | 3       | 3.5      |
| 72  | 3       | 3       | 3      | 4         | 3     | 3        | 4        | 3        | 3        | 4        | 3       | 5       | 4.5      |
| 73  | 3       | 2       | 1      | 3         | 2     | 1        | 4        | 3        | 3        | 3        | 3       | 2.5     | 2.5      |
| 74  | 3       | 2       | 2      | 3         | 3     | 3        | 4        | 3        | 4        | 2        | 3       | 3.5     | 2        |
| 75  | 3       | 1       | 2      | 3         | 2     | 3        | 4        | 3        | 4        | 2        | 3       | 3.5     | 2        |
| 76  | 4       | 3       | 2      | 3         | 2     | 3        | 4        | 3        | 4        | 3        | 3       | 3       | 2.5      |
| 77  | 4       | 1       | 1      | 3         | 4     | 3        | 5        | 5        | 4        | 2        | 4       | 3       | 1.5      |
| 78  | 4       | 2       | 2      | 2         | 3     | 3        | 4        | 3        | 4        | 4        | 4       | 3.5     | 2.5      |
| 79  | 3       | 2       | 3      | 3         | 3     | 3        | 5        | 5        | 4        | 3        | 3       | 5       | 4        |
| 80  | 3       | 3       | 3      | 3         | 2     | 3        | 5        | 2        | 3        | 3        | 3       | 1       | 0.5      |
| 81  | 5       | 1       | 3      | 4         | 5     | 3        | 5        | 4        | 4        | 5        | 5       | 3       | 2        |
| 82  | 4       | 2       | 3      | 4         | 4     | 4        | 5        | 4        | 4        | 4        | 5       | 4       | 3        |
| 83  | 3       | 3       | 3      | 3         | 3     | 2        | 5        | 3        | 4        | 2        | 3       | 5       | 5        |
| 84  | 3       | 5       | 3      | 3         | 3     | 2        | 5        | 3        | 3        | 4        | 3       | 4       | 4        |
| 85  | 5       | 3       | 4      | 4         | 5     | 4        | 5        | 3        | 5        | 5        | 4       | 5       | 4        |
| 86  | 3       | 2       | 3      | 4         | 3     | 4        | 5        | 3        | 4        | 3        | 4       | 4       | 4        |
| 87  | 3       | 3       | 3      | 2         | 3     | 3        | 4        | 4        | 4        | 4        | 3       | 4       | 4        |
| 88  | 3       | 2       | 3      | 2         | 3     | 2        | 4        | 4        | 4        | 4        | 2       | 3       | 4        |
| 89  | 4       | 2       | 2      | 3         | 3     | 3        | 4        | 4        | 4        | 4        | 2       | 3       | 2.5      |
| 90  | 3       | 3       | 3      | 3         | 3     | 3        | 4        | 4        | 3        | 1        | 1       | 4       | 4        |
| 91  | 3       | 3       | 2      | 3         | 3     | 2        | 4        | 4        | 4        | 4        | 2       | 3       | 5        |
| 92  | 3       | 4       | 3      | 3         | 4     | 2        | 4        | 4        | 4        | 4        | 4       | 3       | 4        |
| 93  | 3       | 3       | 2      | 3         | 4     | 3        | 4        | 3        | 3        | 2        | 3       | 4.5     | 3.5      |
| 94  | 3       | 2       | 1      | 2         | 4     | 3        | 4        | 3        | 2        | 3        | 3       | 5       | 0.5      |
| 95  | 4       | 2       | 2      | 4         | 4     | 2        | 5        | 5        | 3        | 2        | 4       | 3.5     | 4.5      |
| 96  | 4       | 1       | 3      | 4         | 4     | 3        | 4        | 4        | 4        | 4        | 4       | 3       | 3.5      |
| 97  | 4       | 3       | 2      | 2         | 3     | 3        | 5        | 3        | 3        | 3        | 3       | 4       | 4        |
| 98  | 3       | 3       | 2      | 3         | 3     | 3        | 4        | 3        | 3        | 2        | 3       | 5       | 5        |
| 99  | 4       | 2       | 3      | 3         | 4     | 3        | 4        | 4        | 4        | 4        | 4       | 5       | 4.5      |
| 100 | 3       | 5       | 2      | 3         | 3     | 1        | 4        | 4        | 1        | 1        | 3       | 5       | 5        |
| 101 | 3       | 4       | 3      | 2         | 4     | 3        | 5        | 3        | 2        | 2        | 3       | 5       | 5        |
| 102 | 4       | 2       | 3      | 2         | 2     | 3        | 5        | 4        | 4        | 4        | 4       | 4.5     | 4.5      |

| ID  | genjs_1 | LEAVE_1 | INCM_1 | BENEFIT_1 | LRN_1 | CAREER_1 | PEERRELA | RESPECTS | SECURE_1 | PARTIRES | HONOR_1 | INCOME5 | BENEFIT5 |
|-----|---------|---------|--------|-----------|-------|----------|----------|----------|----------|----------|---------|---------|----------|
| 103 | 4       | 2       | 2      | 3         | 3     | 2        | 4        | 4        | 4        | 4        | 3       | 5       | 5        |
| 104 | 4       | 2       | 3      | 3         | 4     | 3        | 4        | 4        | 4        | 4        | 3       | 2.5     | 3        |
| 105 | 3       | 3       | 2      | 3         | 3     | 2        | 4        | 4        | 2        | 2        | 3       | 3       | 3        |
| 106 | 4       | 2       | 3      | 4         | 4     | 4        | 4        | 4        | 4        | 3        | 4       | 5       | 4        |
| 107 | 4       | 2       | 3      | 4         | 4     | 4        | 5        | 3        | 4        | 4        | 4       | 4.5     | 4.5      |
| 108 | 3       | 3       | 3      | 3         | 3     | 3        | 5        | 3        | 4        | 3        | 3       | 4       | 4        |
| 109 | 3       | 3       | 3      | 2         | 3     | 3        | 4        | 4        | 4        | 3        | 3       | 4       | 4        |
| 110 | 3       | 3       | 1      | 1         | 3     | 2        | 5        | 3        | 4        | 4        | 3       | 5       | 5        |
| 111 | 3       | 2       | 3      | 3         | 5     | 2        | 4        | 4        | 4        | 4        | 3       | 4.5     | 4        |
| 112 | 4       | 3       | 3      | 4         | 4     | 4        | 4        | 4        | 4        | 5        | 4       | 4.5     | 2        |
| 113 | 4       | 3       | 2      | 3         | 5     | 2        | 4        | 5        | 4        | 3        | 4       | 5       | 4.5      |
| 114 | 4       | 1       | 2      | 3         | 4     | 4        | 5        | 4        | 4        | 4        | 4       | 4.5     | 5        |
| 115 | 3       | 3       | 2      | 3         | 3     | 2        | 5        | 4        | 4        | 4        | 3       | 5       | 5        |
| 116 | 3       | 3       | 2      | 3         | 4     | 2        | 4        | 3        | 4        | 2        | 3       | 5       | 4.5      |
| 117 | 3       | 2       | 2      | 4         | 5     | 3        | 5        | 4        | 4        | 3        | 4       | 4       | 3.5      |
| 118 | 3       | 2       | 2      | 3         | 3     | 1        | 4        | 3        | 3        | 2        | 3       | 3.5     | 1.5      |
| 119 | 3       | 3       | 2      | 3         | 4     | 2        | 4        | 3        | 4        | 2        | 3       | 5       | 4.5      |
| 120 | 3       | 3       | 2      | 3         | 4     | 2        | 5        | 4        | 4        | 4        | 3       | 5       | 4.5      |
| 121 | 2       | 3       | 2      | 3         | 3     | 3        | 4        | 3        | 2        | 3        | 3       | 3.5     | 2        |
| 122 | 3       | 3       | 2      | 3         | 3     | 2        | 5        | 3        | 3        | 3        | 3       | 5       | 4        |
| 123 | 3       | 3       | 2      | 3         | 4     | 2        | 5        | 4        | 4        | 4        | 3       | 4       | 4.5      |
| 124 | 3       | 4       | 3      | 3         | 3     | 2        | 4        | 4        | 3        | 5        | 3       | 1.5     | 1.5      |
| 125 | 5       | 2       | 3      | 4         | 4     | 3        | 4        | 4        | 2        | 4        | 5       | 4.5     | 4.5      |
| 126 | 4       | 1       | 3      | 4         | 3     | 3        | 4        | 4        | 4        | 4        | 3       | 3.5     | 3.5      |
| 127 | 3       | 3       | 3      | 3         | 3     | 3        | 5        | 3        | 4        | 4        | 3       | 4.5     | 5        |
| 128 | 4       | 4       | 3      | 4         | 4     | 4        | 4        | 4        | 4        | 4        | 4       | 4.5     | 4        |
| 129 | 3       | 3       | 3      | 3         | 5     | 3        | 4        | 4        | 2        | 4        | 4       | 3.5     | 4.5      |
| 130 | 4       | 2       | 3      | 4         | 4     | 5        | 5        | 5        | 4        | 5        | 4       | 3       | 3        |
| 131 | 3       | 2       | 2      | 3         | 4     | 3        | 4        | 4        | 2        | 4        | 3       | 5       | 4        |
| 132 | 4       | 2       | 3      | 2         | 4     | 2        | 5        | 4        | 4        | 4        | 3       | 5       | 5        |
| 133 | 4       | 2       | 3      | 2         | 4     | 2        | 5        | 4        | 4        | 4        | 3       | 5       | 5        |
| 134 | 4       | 2       | 3      | 2         | 4     | 2        | 5        | 4        | 4        | 4        | 3       | 4.5     | 5        |
| 135 | 4       | 3       | 3      | 4         | 4     | 2        | 4        | 4        | 4        | 5        | 3       | 5       | 3.5      |
| 136 | 3       | 4       | 2      | 3         | 3     | 2        | 4        | 4        | 4        | 3        | 3       | 5       | 4.5      |

| ID  | genjs_1 | LEAVE_1 | INCM_1 | BENEFIT_1 | LRN_1 | CAREER_1 | PEERRELA | RESPECTS | SECURE_1 | PARTIRES | HONOR_1 | INCOME5 | BENEFIT5 |
|-----|---------|---------|--------|-----------|-------|----------|----------|----------|----------|----------|---------|---------|----------|
| 137 | 4       | 4       | 3      | 4         | 3     | 3        | 4        | 4        | 4        | 4        | 3       | 5       | 4.5      |
| 138 | 3       | 3       | 3      | 2         | 2     | 2        | 5        | 3        | 4        | 2        | 3       | 5       | 5        |
| 139 | 4       | 2       | 2      | 3         | 3     | 3        | 4        | 4        | 4        | 4        | 4       | 5       | 4.5      |
| 140 | 4       | 2       | 3      | 2         | 3     | 1        | 4        | 4        | 4        | 4        | 3       | 5       | 5        |
| 141 | 2       | 4       | 3      | 2         | 2     | 2        | 4        | 4        | 4        | 1        | 2       | 1       | 0.5      |
| 142 | 3       | 2       | 3      | 3         | 3     | 3        | 4        | 4        | 3        | 3        | 3       | 1       | 1        |
| 143 | 4       | 3       | 2      | 4         | 2     | 4        | 5        | 4        | 4        | 4        | 4       | 5       | 5        |
| 144 | 3       | 3       | 2      | 2         | 3     | 1        | 5        | 4        | 3        | 2        | 3       | 4.5     | 4        |
| 145 | 4       | 2       | 2      | 3         | 5     | 3        | 5        | 5        | 4        | 4        | 4       | 4       | 4.5      |
| 146 | 4       | 3       | 2      | 3         | 3     | 3        | 5        | 3        | 4        | 4        | 3       | 4.5     | 4.5      |
| 147 | 3       | 3       | 2      | 2         | 3     | 1        | 5        | 4        | 2        | 2        | 3       | 5       | 4        |
| 148 | 5       | 2       | 2      | 5         | 4     | 4        | 5        | 5        | 5        | 5        | 4       | 4       | 4        |
| 149 | 4       | 1       | 3      | 3         | 3     | 3        | 5        | 5        | 4        | 4        | 3       | 4       | 2.5      |
| 150 | 3       | 5       | 3      | 3         | 4     | 4        | 5        | 5        | 4        | 4        | 3       | 4       | 3.5      |
| 151 | 3       | 3       | 2      | 3         | 4     | 3        | 5        | 3        | 4        | 2        | 4       | 4       | 4        |
| 152 | 4       | 2       | 2      | 4         | 3     | 3        | 5        | 5        | 3        | 4        | 4       | 4       | 4        |
| 153 | 3       | 5       | 2      | 4         | 4     | 3        | 5        | 4        | 5        | 5        | 3       | 3       | 2.5      |
| 154 | 3       | 3       | 3      | 4         | 3     | 3        | 4        | 4        | 4        | 4        | 3       | 5       | 5        |
| 155 | 3       | 2       | 3      | 2         | 2     | 1        | 4        | 4        | 4        | 2        | 2       | 2.5     | 3.5      |
| 156 | 3       | 2       | 4      | 3         | 3     | 3        | 5        | 3        | 5        | 4        | 2       | 5       | 2.5      |
| 157 | 3       | 2       | 3      | 4         | 4     | 1        | 4        | 4        | 4        | 4        | 4       | 2.5     | 2.5      |
| 158 | 4       | 2       | 3      | 4         | 4     | 4        | 4        | 4        | 4        | 4        | 4       | 4       | 4        |
| 159 | 4       | 4       | 1      | 4         | 4     | 3        | 4        | 5        | 5        | 5        | 4       | 2.5     | 4        |
| 160 | 4       | 3       | 3      | 4         | 5     | 4        | 5        | 5        | 4        | 4        | 3       | 4.5     | 3.5      |
| 161 | 4       | 2       | 3      | 4         | 4     | 4        | 4        | 4        | 4        | 4        | 4       | 3       | 4        |
| 162 | 3       | 3       | 3      | 2         | 4     | 3        | 4        | 4        | 4        | 2        | 3       | 4.5     | 3.5      |
| 163 | 4       | 2       | 3      | 4         | 4     | 4        | 4        | 4        | 4        | 4        | 4       | 1.5     | 0.5      |
| 164 | 3       | 2       | 3      | 2         | 2     | 2        | 4        | 4        | 4        | 2        | 3       | 3       | 3        |
| 165 | 3       | 2       | 3      | 2         | 2     | 1        | 3        | 3        | 1        | 2        | 2       | 3       | 0.5      |
| 166 | 3       | 3       | 3      | 3         | 3     | 3        | 4        | 4        | 2        | 3        | 3       | 4       | 1        |
| 167 | 3       | 2       | 1      | 3         | 3     | 2        | 4        | 4        | 3        | 1        | 3       | 3.5     | 2.5      |
| 168 | 3       | 4       | 3      | 3         | 3     | 3        | 4        | 4        | 4        | 4        | 3       | 3.5     | 3.5      |
| 169 | 4       | 2       | 3      | 4         | 3     | 3        | 4        | 3        | 4        | 4        | 3       | 4       | 4        |
| 170 | 4       | 2       | 3      | 3         | 3     | 3        | 5        | 3        | 4        | 4        | 3       | 4.5     | 2.5      |

| ID  | genjs_1 | LEAVE_1 | INCM_1 | BENEFIT_1 | LRN_1 | CAREER_1 | PEERRELA | RESPECTS | SECURE_1 | PARTIRES | HONOR_1 | INCOME5 | BENEFIT5 |
|-----|---------|---------|--------|-----------|-------|----------|----------|----------|----------|----------|---------|---------|----------|
| 171 | 4       | 1       | 3      | 4         | 4     | 3        | 5        | 4        | 4        | 4        | 4       | 5       | 5        |
| 172 | 3       | 3       | 2      | 1         | 3     | 3        | 4        | 4        | 4        | 1        | 1       | 2       | 3        |
| 173 | 3       | 2       | 5      | 4         | 4     | 4        | 5        | 4        | 3        | 5        | 4       | 2.5     | 3.5      |
| 174 | 3       | 3       | 3      | 2         | 4     | 3        | 5        | 4        | 3        | 3        | 4       | 4.5     | 4        |
| 175 | 4       | 3       | 4      | 4         | 5     | 3        | 4        | 4        | 3        | 4        | 4       | 4       | 4        |
| 176 | 1       | 4       | 3      | 1         | 3     | 1        | 3        | 1        | 1        | 1        | 1       | 4.5     | 4.5      |
| 177 | 2       | 5       | 1      | 2         | 2     | 2        | 5        | 3        | 2        | 2        | 2       | 4.5     | 3.5      |
| 178 | 3       | 3       | 2      | 2         | 3     | 2        | 5        | 4        | 3        | 2        | 2       | 2       | 0.5      |
| 179 | 2       | 4       | 3      | 2         | 3     | 2        | 4        | 4        | 2        | 2        | 3       | 2.5     | 1.5      |
| 180 | 3       | 3       | 3      | 2         | 3     | 4        | 1        | 4        | 3        | 3        | 3       | 4       | 4        |
| 181 | 4       | 3       | 3      | 4         | 5     | 3        | 4        | 4        | 4        | 4        | 4       | 4       | 4.5      |
| 182 | 3       | 3       | 3      | 3         | 4     | 2        | 4        | 4        | 3        | 4        | 3       | 4       | 4.5      |
| 183 | 1       | 3       | 5      | 4         | 4     | 4        | 5        | 4        | 4        | 1        | 4       | 3.5     | 4        |
| 184 | 3       | 2       | 3      | 3         | 3     | 3        | 4        | 4        | 2        | 2        | 3       | 3.5     | 3.5      |
| 185 | 3       | 3       | 3      | 3         | 3     | 3        | 3        | 3        | 2        | 2        | 3       | 5       | 5        |
| 186 | 4       | 3       | 3      | 3         | 3     | 3        | 3        | 3        | 4        | 4        | 3       | 4.5     | 4.5      |
| 187 | 2       | 4       | 3      | 1         | 2     | 1        | 5        | 5        | 2        | 2        | 2       | 1       | 0.5      |
| 188 | 3       | 3       | 3      | 3         | 3     | 3        | 4        | 4        | 3        | 3        | 3       | 4.5     | 4        |
| 189 | 4       | 2       | 3      | 3         | 3     | 3        | 4        | 3        | 3        | 3        | 3       | 2       | 3        |
| 190 | 4       | 3       | 3      | 2         | 2     | 1        | 4        | 4        | 3        | 4        | 3       | 4       | 1        |
| 191 | 3       | 4       | 1      | 2         | 4     | 1        | 5        | 3        | 4        | 2        | 2       | 3.5     | 4.5      |
| 192 | 3       | 3       | 2      | 3         | 3     | 2        | 5        | 4        | 4        | 3        | 3       | 2.5     | 2.5      |
| 193 | 4       | 2       | 3      | 3         | 4     | 4        | 4        | 4        | 4        | 4        | 4       | 4.5     | 4        |
| 194 | 4       | 3       | 2      | 3         | 1     | 2        | 4        | 4        | 4        | 2        | 3       | 5       | 4        |
| 195 | 2       | 3       | 1      | 1         | 2     | 1        | 4        | 4        | 3        | 1        | 3       | 5       | 5        |
| 196 | 4       | 2       | 3      | 3         | 3     | 2        | 4        | 4        | 4        | 2        | 3       | 4       | 4.5      |
| 197 | 3       | 4       | 2      | 3         | 4     | 1        | 5        | 5        | 4        | 3        | 2       | 4       | 1.5      |
| 198 | 2       | 3       | 2      | 2         | 2     | 1        | 4        | 3        | 4        | 2        | 2       | 5       | 3.5      |
| 199 | 3       | 1       | 3      | 3         | 3     | 3        | 5        | 4        | 4        | 1        | 3       | 2       | 3        |
| 200 | 3       | 4       | 1      | 2         | 2     | 4        | 5        | 5        | 4        | 2        | 3       | 5       | 5        |
| 201 | 3       | 2       | 2      | 2         | 3     | 3        | 5        | 4        | 4        | 3        | 3       | 4.5     | 5        |
| 202 | 4       | 1       | 4      | 4         | 4     | 4        | 4        | 4        | 4        | 5        | 4       | 4       | 4        |
| 203 | 4       | 3       | 2      | 4         | 3     | 3        | 4        | 3        | 3        | 3        | 4       | 3       | 3        |
| 204 | 3       | 3       | 3      | 4         | 3     | 3        | 5        | 3        | 3        | 3        | 3       | 2       | 1        |

| ID  | genjs_1 | LEAVE_1 | INCM_1 | BENEFIT_1 | LRN_1 | CAREER_1 | PEERRELA | RESPECTS | SECURE_1 | PARTIRES | HONOR_1 | INCOME5 | BENEFIT5 |
|-----|---------|---------|--------|-----------|-------|----------|----------|----------|----------|----------|---------|---------|----------|
| 205 | 4       | 3       | 3      | 3         | 4     | 5        | 4        | 4        | 4        | 4        | 4       | 2.5     | 1        |
| 206 | 4       | 1       | 3      | 4         | 4     | 3        | 5        | 4        | 5        | 4        | 4       | 2.5     | 2.5      |
| 207 | 4       | 3       | 3      | 3         | 4     | 3        | 4        | 4        | 4        | 5        | 4       | 4.5     | 4        |
| 208 | 3       | 3       | 3      | 1         | 1     | 1        | 5        | 3        | 2        | 3        | 1       | 5       | 4.5      |
| 209 | 4       | 2       | 3      | 3         | 3     | 3        | 4        | 3        | 3        | 4        | 3       | 3.5     | 4        |
| 210 | 3       | 3       | 1      | 3         | 4     | 1        | 4        | 5        | 4        | 4        | 2       | 4.5     | 5        |
| 211 | 4       | 2       | 1      | 3         | 5     | 3        | 5        | 5        | 4        | 4        | 4       | 3       | 4        |
| 212 | 3       | 2       | 3      | 2         | 2     | 2        | 4        | 4        | 2        | 3        | 2       | 2.5     | 0.5      |
| 213 | 4       | 1       | 3      | 4         | 3     | 4        | 5        | 5        | 2        | 4        | 5       | 2.5     | 4        |
| 214 | 3       | 1       | 5      | 4         | 3     | 3        | 3        | 4        | 4        | 4        | 4       | 3       | 2.5      |
| 215 | 4       | 3       | 3      | 4         | 4     | 3        | 4        | 4        | 4        | 4        | 4       | 4       | 4        |
| 216 | 4       | 3       | 2      | 4         | 3     | 3        | 4        | 4        | 4        | 4        | 4       | 2.5     | 1        |
| 217 | 4       | 1       | 3      | 4         | 3     | 3        | 5        | 4        | 4        | 3        | 3       | 3.5     | 2.5      |
| 218 | 3       | 4       | 3      | 3         | 3     | 3        | 4        | 3        | 4        | 4        | 3       | 4       | 3        |
| 219 | 2       | 4       | 3      | 1         | 2     | 1        | 5        | 5        | 4        | 1        | 2       | 5       | 4        |
| 220 | 4       | 1       | 2      | 5         | 3     | 3        | 5        | 4        | 4        | 4        | 4       | 5       | 3.5      |
| 221 | 3       | 2       | 3      | 3         | 3     | 3        | 4        | 3        | 4        | 3        | 3       | 5       | 4.5      |
| 222 | 3       | 2       | 2      | 2         | 2     | 3        | 5        | 4        | 4        | 3        | 3       | 5       | 5        |
| 223 | 2       | 4       | 3      | 1         | 2     | 1        | 4        | 4        | 4        | 1        | 2       | 4       | 4.5      |
| 224 | 3       | 3       | 3      | 1         | 3     | 1        | 4        | 4        | 4        | 1        | 2       | 4       | 4        |
| 225 | 4       | 3       | 1      | 3         | 4     | 3        | 4        | 3        | 4        | 4        | 3       | 5       | 5        |
| 226 | 3       | 1       | 1      | 2         | 2     | 2        | 4        | 3        | 2        | 3        | 2       | 5       | 5        |
| 227 | 3       | 3       | 4      | 3         | 3     | 1        | 4        | 3        | 3        | 3        | 3       | 0.5     | 1.5      |
| 228 | 3       | 3       | 2      | 1         | 3     | 1        | 5        | 4        | 4        | 2        | 3       | 5       | 4        |
| 229 | 4       | 2       | 2      | 3         | 4     | 2        | 5        | 4        | 4        | 2        | 3       | 4.5     | 4.5      |
| 230 | 4       | 2       | 2      | 3         | 3     | 3        | 4        | 3        | 4        | 4        | 4       | 4       | 4        |
| 231 | 3       | 2       | 2      | 3         | 1     | 3        | 4        | 4        | 3        | 4        | 3       | 5       | 4        |
| 232 | 4       | 2       | 2      | 2         | 4     | 3        | 5        | 4        | 4        | 4        | 3       | 4       | 3.5      |
| 233 | 3       | 2       | 2      | 3         | 2     | 2        | 5        | 4        | 3        | 4        | 3       | 4.5     | 3.5      |
| 234 | 3       | 2       | 2      | 2         | 3     | 3        | 4        | 4        | 2        | 2        | 3       | 4.5     | 5        |
| 235 | 3       | 4       | 1      | 3         | 5     | 1        | 5        | 4        | 2        | 2        | 1       | 5       | 5        |
| 236 | 5       | 1       | 3      | 5         | 5     | 4        | 5        | 4        | 4        | 5        | 5       | 3.5     | 1        |
| 237 | 2       | 3       | 1      | 2         | 3     | 1        | 5        | 4        | 3        | 2        | 2       | 5       | 5        |
| 238 | 5       | 2       | 3      | 4         | 4     | 4        | 5        | 4        | 4        | 5        | 4       | 4.5     | 4.5      |

| ID  | genjs_1 | LEAVE_1 | INCM_1 | BENEFIT_1 | LRN_1 | CAREER_1 | PEERRELA | RESPECTS | SECURE_1 | PARTIRES | HONOR_1 | INCOME5 | BENEFIT5 |
|-----|---------|---------|--------|-----------|-------|----------|----------|----------|----------|----------|---------|---------|----------|
| 239 | 3       | 4       | 2      | 1         | 3     | 3        | 4        | 4        | 2        | 4        | 2       | 3       | 2.5      |
| 240 | 3       | 3       | 1      | 2         | 3     | 1        | 5        | 3        | 3        | 1        | 1       | 3       | 3.5      |
| 241 | 2       | 4       | 3      | 2         | 2     | 1        | 4        | 4        | 3        | 1        | 2       | 0.5     | 0.5      |
| 242 | 3       | 3       | 3      | 3         | 2     | 1        | 5        | 4        | 2        | 2        | 3       | 3.5     | 2.5      |
| 243 | 4       | 4       | 1      | 2         | 3     | 1        | 5        | 4        | 3        | 2        | 2       | 5       | 5        |
| 244 | 1       | 4       | 2      | 1         | 3     | 1        | 4        | 3        | 3        | 2        | 2       | 4       | 4        |
| 245 | 3       | 3       | 3      | 3         | 3     | 3        | 5        | 4        | 3        | 2        | 3       | 5       | 5        |
| 246 | 3       | 3       | 4      | 3         | 3     | 2        | 4        | 3        | 3        | 3        | 3       | 5       | 5        |
| 247 | 4       | 4       | 3      | 3         | 3     | 2        | 4        | 4        | 4        | 3        | 2       | 5       | 5        |
| 248 | 3       | 4       | 2      | 2         | 3     | 2        | 4        | 3        | 3        | 4        | 3       | 5       | 5        |
| 249 | 4       | 2       | 3      | 3         | 4     | 3        | 5        | 4        | 4        | 4        | 4       | 3       | 3        |
| 250 | 4       | 2       | 3      | 3         | 3     | 3        | 3        | 3        | 4        | 4        | 3       | 4       | 4        |
| 251 | 3       | 2       | 3      | 3         | 4     | 1        | 5        | 5        | 3        | 2        | 3       | 4       | 4        |
| 252 | 3       | 2       | 3      | 3         | 4     | 1        | 5        | 5        | 3        | 2        | 3       | 4       | 4        |
| 253 | 4       | 2       | 5      | 1         | 4     | 3        | 4        | 4        | 4        | 4        | 4       | 3.5     | 3.5      |
| 254 | 4       | 2       | 3      | 3         | 3     | 3        | 3        | 4        | 4        | 4        | 3       | 3       | 3.5      |
| 255 | 4       | 3       | 3      | 2         | 3     | 3        | 4        | 4        | 3        | 2        | 2       | 4.5     | 3        |
| 256 | 5       | 2       | 3      | 3         | 4     | 4        | 4        | 3        | 4        | 4        | 3       | 5       | 5        |
| 257 | 3       | 2       | 3      | 3         | 3     | 3        | 4        | 4        | 4        | 3        | 3       | 4       | 4        |
| 258 | 3       | 3       | 3      | 5         | 4     | 4        | 3        | 3        | 4        | 4        | 3       | 5       | 5        |
| 259 | 5       | 1       | 3      | 5         | 4     | 4        | 4        | 5        | 4        | 4        | 4       | 4.5     | 4        |
| 260 | 4       | 2       | 3      | 4         | 4     | 4        | 5        | 2        | 4        | 4        | 4       | 4.5     | 4        |
| 261 | 2       | 2       | 2      | 3         | 3     | 3        | 3        | 3        | 4        | 4        | 3       | 5       | 5        |
| 262 | 3       | 3       | 3      | 3         | 3     | 3        | 4        | 2        | 3        | 3        | 3       | 4       | 4        |
| 263 | 3       | 2       | 2      | 4         | 4     | 3        | 5        | 4        | 4        | 4        | 4       | 5       | 4.5      |
| 264 | 5       | 1       | 2      | 5         | 4     | 4        | 4        | 5        | 4        | 4        | 4       | 5       | 5        |
| 265 | 3       | 3       | 3      | 3         | 3     | 3        | 4        | 2        | 4        | 2        | 3       | 5       | 4.5      |
| 266 | 4       | 2       | 3      | 3         | 4     | 4        | 4        | 4        | 4        | 4        | 4       | 4.5     | 4        |
| 267 | 3       | 2       | 1      | 3         | 3     | 3        | 5        | 4        | 4        | 2        | 4       | 5       | 5        |
| 268 | 4       | 2       | 3      | 3         | 3     | 3        | 4        | 3        | 4        | 3        | 3       | 5       | 3.5      |
| 269 | 3       | 3       | 1      | 3         | 4     | 2        | 4        | 4        | 4        | 2        | 3       | 5       | 5        |
| 270 | 3       | 3       | 1      | 3         | 4     | 2        | 4        | 4        | 4        | 2        | 3       | 3.5     | 4        |
| 271 | 3       | 3       | 3      | 4         | 3     | 3        | 4        | 4        | 4        | 2        | 3       | 5       | 5        |
| 272 | 3       | 1       | 2      | 3         | 3     | 3        | 4        | 4        | 3        | 3        | 3       | 2.5     | 2.5      |



| ID  | genjs_1 | LEAVE_1 | INCM_1 | BENEFIT_1 | LRN_1 | CAREER_1 | PEERRELA | RESPECTS | SECURE_1 | PARTIRES | HONOR_1 | INCOME5 | BENEFIT5 |
|-----|---------|---------|--------|-----------|-------|----------|----------|----------|----------|----------|---------|---------|----------|
| 273 | 4       | 2       | 3      | 3         | 4     | 3        | 5        | 4        | 4        | 4        | 2       | 4       | 4        |
| 274 | 5       | 1       | 3      | 4         | 4     | 4        | 5        | 4        | 4        | 5        | 4       | 4.5     | 5        |
| 275 | 4       | 2       | 2      | 3         | 3     | 3        | 4        | 4        | 4        | 4        | 4       | 4.5     | 5        |
| 276 | 4       | 1       | 3      | 4         | 4     | 3        | 4        | 4        | 4        | 4        | 3       | 2.5     | 4        |
| 277 | 3       | 2       | 2      | 3         | 4     | 3        | 4        | 3        | 5        | 2        | 3       | 5       | 5        |
| 278 | 3       | 2       | 2      | 3         | 3     | 3        | 4        | 4        | 5        | 2        | 3       | 5       | 5        |
| 279 | 3       | 1       | 2      | 3         | 3     | 2        | 4        | 4        | 2        | 3        | 3       | 4.5     | 4.5      |
| 280 | 4       | 2       | 3      | 4         | 4     | 4        | 4        | 3        | 4        | 4        | 4       | 4.5     | 4        |
| 281 | 5       | 1       | 2      | 5         | 4     | 4        | 4        | 5        | 4        | 4        | 4       | 5       | 4.5      |
| 282 | 3       | 3       | 3      | 2         | 3     | 1        | 5        | 4        | 4        | 2        | 3       | 5       | 5        |
| 283 | 4       | 1       | 2      | 5         | 3     | 3        | 5        | 3        | 4        | 4        | 4       | 5       | 5        |
| 284 | 3       | 2       | 3      | 2         | 3     | 1        | 5        | 3        | 4        | 2        | 3       | 4       | 4        |
| 285 | 4       | 1       | 3      | 3         | 3     | 2        | 5        | 4        | 4        | 4        | 4       | 3       | 3        |
| 286 | 5       | 2       | 3      | 4         | 5     | 5        | 5        | 5        | 5        | 5        | 5       | 4       | 4        |
| 287 | 4       | 2       | 3      | 3         | 3     | 3        | 5        | 3        | 4        | 4        | 3       | 3       | 3        |
| 288 | 5       | 1       | 3      | 4         | 5     | 5        | 5        | 5        | 5        | 5        | 5       | 4       | 4        |
| 289 | 3       | 2       | 4      | 3         | 3     | 3        | 4        | 2        | 4        | 2        | 3       | 2.5     | 2.5      |
| 290 | 4       | 3       | 3      | 4         | 4     | 3        | 4        | 3        | 4        | 5        | 4       | 2.5     | 4        |
| 291 | 3       | 3       | 3      | 3         | 2     | 2        | 4        | 2        | 4        | 3        | 3       | 5       | 3.5      |
| 292 | 4       | 2       | 3      | 3         | 3     | 3        | 5        | 4        | 4        | 4        | 3       | 4       | 4        |
| 293 | 3       | 2       | 3      | 4         | 4     | 2        | 5        | 4        | 4        | 5        | 4       | 3.5     | 2        |
| 294 | 4       | 2       | 2      | 3         | 3     | 3        | 4        | 4        | 4        | 4        | 3       | 3       | 3.5      |
| 295 | 4       | 1       | 3      | 4         | 3     | 1        | 5        | 3        | 4        | 3        | 3       | 4       | 4        |
| 296 | 5       | 2       | 3      | 4         | 4     | 4        | 5        | 3        | 5        | 5        | 5       | 3.5     | 2.5      |
| 297 | 3       | 3       | 1      | 4         | 3     | 3        | 5        | 4        | 4        | 3        | 3       | 3       | 3        |
| 298 | 3       | 3       | 3      | 3         | 3     | 3        | 4        | 2        | 3        | 3        | 3       | 4       | 4        |
| 299 | 4       | 3       | 2      | 3         | 3     | 3        | 4        | 4        | 4        | 4        | 3       | 5       | 5        |
| 300 | 3       | 2       | 3      | 3         | 3     | 2        | 4        | 3        | 4        | 2        | 3       | 3.5     | 3.5      |
| 301 | 5       | 1       | 2      | 5         | 4     | 4        | 4        | 4        | 4        | 5        | 4       | 5       | 4        |
| 302 | 4       | 2       | 2      | 3         | 4     | 3        | 5        | 3        | 3        | 4        | 4       | 4.5     | 4.5      |
| 303 | 4       | 2       | 2      | 4         | 4     | 4        | 4        | 4        | 4        | 4        | 4       | 4.5     | 4.5      |
| 304 | 3       | 2       | 2      | 3         | 3     | 3        | 4        | 3        | 3        | 4        | 4       | 5       | 5        |
| 305 | 4       | 2       | 2      | 4         | 4     | 4        | 4        | 4        | 4        | 5        | 4       | 5       | 5        |
| 306 | 4       | 2       | 2      | 3         | 3     | 3        | 5        | 4        | 4        | 3        | 3       | 4.5     | 4.5      |

| ID  | genjs_1 | LEAVE_1 | INCM_1 | BENEFIT_1 | LRN_1 | CAREER_1 | PEERRELA | RESPECTS | SECURE_1 | PARTIRES | HONOR_1 | INCOME5 | BENEFIT5 |
|-----|---------|---------|--------|-----------|-------|----------|----------|----------|----------|----------|---------|---------|----------|
| 307 | 5       | 1       | 1      | 4         | 4     | 5        | 5        | 5        | 5        | 4        | 5       | 4       | 4        |
| 308 | 4       | 2       | 1      | 4         | 3     | 2        | 4        | 4        | 4        | 4        | 4       | 1.5     | 2.5      |
| 309 | 3       | 2       | 3      | 3         | 3     | 3        | 3        | 3        | 4        | 2        | 3       | 4.5     | 2        |
| 310 | 4       | 2       | 3      | 4         | 5     | 3        | 1        | 3        | 5        | 4        | 4       | 5       | 4.5      |
| 311 | 4       | 2       | 2      | 4         | 4     | 4        | 4        | 3        | 4        | 4        | 4       | 5       | 5        |
| 312 | 5       | 2       | 2      | 3         | 3     | 3        | 5        | 4        | 4        | 5        | 4       | 5       | 3.5      |
| 313 | 4       | 3       | 3      | 4         | 3     | 3        | 4        | 4        | 4        | 4        | 4       | 4.5     | 5        |
| 314 | 4       | 1       | 3      | 3         | 4     | 3        | 5        | 4        | 4        | 3        | 3       | 5       | 3.5      |
| 315 | 4       | 1       | 3      | 3         | 3     | 3        | 5        | 4        | 4        | 4        | 3       | 4       | 4        |
| 316 | 4       | 2       | 2      | 3         | 3     | 2        | 4        | 3        | 4        | 4        | 3       | 5       | 5        |
| 317 | 3       | 3       | 3      | 3         | 3     | 3        | 4        | 4        | 4        | 4        | 3       | 4       | 4        |
| 318 | 4       | 2       | 3      | 3         | 3     | 3        | 4        | 4        | 3        | 2        | 3       | 5       | 4        |
| 319 | 4       | 2       | 3      | 4         | 3     | 3        | 4        | 4        | 5        | 2        | 3       | 5       | 4        |
| 320 | 4       | 2       | 3      | 4         | 4     | 3        | 5        | 3        | 5        | 4        | 4       | 5       | 5        |
| 321 | 4       | 2       | 3      | 4         | 3     | 4        | 4        | 4        | 4        | 4        | 4       | 4       | 3.5      |
| 322 | 3       | 2       | 2      | 2         | 3     | 3        | 4        | 3        | 4        | 2        | 3       | 4       | 4        |
| 323 | 4       | 2       | 3      | 4         | 4     | 3        | 4        | 4        | 4        | 4        | 3       | 5       | 4        |
| 324 | 3       | 2       | 4      | 3         | 2     | 1        | 4        | 2        | 4        | 3        | 2       | 5       | 3.5      |
| 325 | 3       | 1       | 4      | 3         | 3     | 3        | 3        | 3        | 4        | 3        | 3       | 5       | 4        |
| 326 | 4       | 2       | 3      | 4         | 4     | 3        | 4        | 4        | 4        | 4        | 4       | 4       | 4        |
| 327 | 5       | 1       | 3      | 4         | 4     | 4        | 4        | 4        | 5        | 5        | 4       | 5       | 5        |
| 328 | 3       | 2       | 3      | 3         | 4     | 3        | 4        | 4        | 4        | 3        | 4       | 4.5     | 5        |
| 329 | 4       | 2       | 3      | 3         | 3     | 3        | 4        | 4        | 4        | 4        | 3       | 2.5     | 2        |
| 330 | 4       | 3       | 2      | 4         | 3     | 3        | 3        | 4        | 4        | 3        | 3       | 5       | 5        |
| 331 | 4       | 3       | 2      | 2         | 3     | 3        | 5        | 3        | 4        | 4        | 3       | 5       | 4.5      |
| 332 | 3       | 3       | 3      | 3         | 3     | 3        | 5        | 3        | 4        | 5        | 4       | 1       | 1        |
| 333 | 3       | 3       | 3      | 3         | 3     | 3        | 5        | 3        | 4        | 5        | 4       | 4.5     | 4.5      |
| 334 | 5       | 1       | 4      | 4         | 4     | 4        | 5        | 4        | 4        | 4        | 4       | 4       | 4        |
| 335 | 5       | 2       | 4      | 3         | 5     | 3        | 5        | 5        | 5        | 5        | 4       | 4.5     | 2.5      |
| 336 | 3       | 3       | 3      | 3         | 3     | 3        | 4        | 4        | 4        | 3        | 3       | 5       | 5        |
| 337 | 4       | 2       | 4      | 4         | 4     | 3        | 4        | 4        | 4        | 4        | 3       | 2.5     | 2.5      |
| 338 | 4       | 1       | 4      | 4         | 4     | 4        | 5        | 5        | 5        | 4        | 4       | 5       | 4        |
| 339 | 4       | 1       | 3      | 3         | 3     | 3        | 4        | 4        | 4        | 4        | 4       | 5       | 5        |
| 340 | 4       | 3       | 3      | 4         | 4     | 3        | 5        | 2        | 4        | 3        | 3       | 4.5     | 5        |

| ID  | genjs_1 | LEAVE_1 | INCM_1 | BENEFIT_1 | LRN_1 | CAREER_1 | PEERRELA | RESPECTS | SECURE_1 | PARTIRES | HONOR_1 | INCOME5 | BENEFIT5 |
|-----|---------|---------|--------|-----------|-------|----------|----------|----------|----------|----------|---------|---------|----------|
| 341 | 3       | 3       | 2      | 3         | 1     | 2        | 4        | 3        | 4        | 3        | 3       | 5       | 5        |
| 342 | 4       | 3       | 3      | 4         | 4     | 3        | 4        | 4        | 4        | 3        | 4       | 4       | 4        |
| 343 | 3       | 3       | 2      | 4         | 2     | 2        | 4        | 4        | 4        | 4        | 3       | 5       | 5        |
| 344 | 3       | 4       | 3      | 4         | 4     | 3        | 4        | 4        | 4        | 4        | 3       | 2.5     | 2.5      |
| 345 | 3       | 3       | 4      | 2         | 2     | 3        | 4        | 4        | 4        | 3        | 4       | 4.5     | 4.5      |
| 346 | 3       | 2       | 4      | 3         | 3     | 2        | 4        | 4        | 3        | 3        | 3       | 4       | 4        |
| 347 | 3       | 3       | 3      | 3         | 4     | 3        | 4        | 3        | 4        | 3        | 3       | 5       | 5        |
| 348 | 4       | 2       | 3      | 4         | 4     | 4        | 5        | 5        | 4        | 4        | 4       | 5       | 4        |
| 349 | 4       | 2       | 3      | 4         | 4     | 4        | 5        | 5        | 4        | 4        | 3       | 5       | 5        |
| 350 | 3       | 2       | 3      | 2         | 3     | 3        | 3        | 3        | 3        | 2        | 3       | 3.5     | 0.5      |
| 351 | 3       | 2       | 3      | 3         | 3     | 2        | 4        | 3        | 2        | 3        | 4       | 1       | 1        |
| 352 | 4       | 2       | 3      | 3         | 4     | 4        | 4        | 4        | 4        | 3        | 3       | 2.5     | 3        |
| 353 | 3       | 2       | 3      | 2         | 4     | 2        | 4        | 4        | 4        | 2        | 3       | 3.5     | 3        |
| 354 | 4       | 3       | 2      | 4         | 4     | 2        | 4        | 3        | 2        | 5        | 4       | 4       | 4        |
| 355 | 5       | 1       | 3      | 3         | 5     | 4        | 5        | 5        | 4        | 4        | 4       | 4       | 3.5      |
| 356 | 3       | 2       | 3      | 2         | 2     | 2        | 3        | 3        | 4        | 2        | 2       | 4       | 4        |
| 357 | 4       | 2       | 3      | 3         | 4     | 3        | 4        | 4        | 4        | 3        | 3       | 1.5     | 2        |
| 358 | 3       | 1       | 3      | 3         | 3     | 3        | 4        | 4        | 4        | 2        | 3       | 4.5     | 4        |
| 359 | 3       | 2       | 2      | 2         | 3     | 2        | 4        | 5        | 4        | 3        | 2       | 5       | 5        |
| 360 | 3       | 3       | 2      | 2         | 3     | 2        | 3        | 4        | 3        | 2        | 3       | 4.5     | 4        |
| 361 | 4       | 4       | 1      | 2         | 3     | 2        | 4        | 4        | 3        | 2        | 2       | 5       | 5        |
| 362 | 3       | 3       | 5      | 1         | 3     | 2        | 3        | 4        | 2        | 2        | 3       | 5       | 4        |
| 363 | 2       | 4       | 2      | 3         | 3     | 1        | 4        | 3        | 3        | 3        | 3       | 5       | 5        |
| 364 | 4       | 2       | 3      | 3         | 4     | 4        | 4        | 4        | 4        | 5        | 5       | 5       | 5        |
| 365 | 4       | 2       | 2      | 2         | 2     | 3        | 4        | 4        | 4        | 4        | 3       | 5       | 5        |
| 366 | 4       | 2       | 1      | 4         | 5     | 4        | 4        | 4        | 5        | 4        | 5       | 5       | 4.5      |
| 367 | 4       | 1       | 1      | 4         | 4     | 4        | 4        | 5        | 4        | 4        | 4       | 5       | 4        |
| 368 | 4       | 3       | 3      | 3         | 3     | 4        | 4        | 4        | 4        | 3        | 4       | 5       | 5        |
| 369 | 3       | 2       | 3      | 3         | 2     | 3        | 4        | 4        | 2        | 3        | 3       | 2.5     | 5        |
| 370 | 4       | 2       | 4      | 4         | 4     | 4        | 5        | 4        | 4        | 5        | 4       | 1.5     | 2.5      |
| 371 | 4       | 2       | 4      | 4         | 4     | 3        | 5        | 5        | 4        | 4        | 4       | 5       | 5        |
| 372 | 4       | 2       | 4      | 4         | 4     | 4        | 5        | 4        | 4        | 5        | 5       | 4.5     | 4        |
| 373 | 3       | 3       | 3      | 3         | 4     | 3        | 4        | 4        | 3        | 4        | 3       | 2       | 1.5      |
| 374 | 3       | 5       | 1      | 4         | 5     | 3        | 5        | 5        | 4        | 1        | 4       | 5       | 5        |

| ID  | genjs_1 | LEAVE_1 | INCM_1 | BENEFIT_1 | LRN_1 | CAREER_1 | PEERRELA | RESPECTS | SECURE_1 | PARTIRES | HONOR_1 | INCOME5 | BENEFIT5 |
|-----|---------|---------|--------|-----------|-------|----------|----------|----------|----------|----------|---------|---------|----------|
| 375 | 4       | 2       | 4      | 4         | 4     | 4        | 4        | 4        | 4        | 5        | 4       | 5       | 4        |
| 376 | 4       | 2       | 4      | 4         | 4     | 4        | 5        | 4        | 4        | 5        | 5       | 4.5     | 4        |
| 377 | 4       | 4       | 2      | 3         | 3     | 4        | 5        | 5        | 4        | 3        | 3       | 3.5     | 3        |
| 378 | 4       | 5       | 1      | 3         | 4     | 4        | 4        | 4        | 4        | 4        | 4       | 5       | 4        |
| 379 | 3       | 2       | 3      | 3         | 3     | 2        | 3        | 4        | 3        | 1        | 2       | 5       | 5        |
| 380 | 5       | 1       | 3      | 4         | 3     | 3        | 5        | 5        | 5        | 4        | 3       | 5       | 5        |
| 381 | 2       | 4       | 3      | 2         | 4     | 2        | 3        | 4        | 5        | 5        | 4       | 5       | 2        |
| 382 | 4       | 3       | 2      | 2         | 3     | 3        | 3        | 4        | 4        | 4        | 3       | 4       | 5        |
| 383 | 3       | 2       | 1      | 2         | 3     | 3        | 3        | 3        | 3        | 4        | 3       | 5       | 3.5      |
| 384 | 4       | 2       | 2      | 3         | 5     | 3        | 5        | 4        | 3        | 3        | 4       | 4.5     | 4        |
| 385 | 3       | 2       | 3      | 3         | 3     | 3        | 3        | 5        | 3        | 2        | 3       | 2.5     | 2        |
| 386 | 4       | 3       | 1      | 3         | 4     | 3        | 5        | 5        | 4        | 4        | 4       | 4       | 4        |
| 387 | 3       | 2       | 2      | 3         | 2     | 2        | 4        | 4        | 3        | 1        | 3       | 5       | 4        |
| 388 | 3       | 2       | 3      | 3         | 5     | 3        | 5        | 5        | 3        | 2        | 3       | 2.5     | 3        |
| 389 | 3       | 2       | 2      | 3         | 3     | 3        | 4        | 4        | 3        | 4        | 4       | 2.5     | 2.5      |
| 390 | 5       | 2       | 3      | 4         | 5     | 4        | 4        | 4        | 4        | 3        | 4       | 4.5     | 4.5      |
| 391 | 3       | 4       | 3      | 3         | 3     | 3        | 4        | 4        | 3        | 4        | 4       | 4       | 4.5      |
| 392 | 3       | 3       | 4      | 3         | 2     | 3        | 5        | 4        | 3        | 4        | 2       | 4.5     | 3        |
| 393 | 3       | 3       | 3      | 3         | 3     | 4        | 4        | 4        | 3        | 3        | 3       | 3.5     | 3.5      |
| 394 | 3       | 3       | 4      | 2         | 3     | 3        | 4        | 4        | 3        | 3        | 3       | 0.5     | 2        |
| 395 | 4       | 3       | 3      | 3         | 4     | 4        | 5        | 4        | 4        | 4        | 3       | 2.5     | 2        |
| 396 | 4       | 2       | 3      | 3         | 3     | 3        | 3        | 3        | 4        | 3        | 3       | 4       | 4        |
| 397 | 4       | 2       | 3      | 4         | 3     | 3        | 4        | 3        | 4        | 3        | 3       | 2.5     | 5        |
| 398 | 3       | 4       | 3      | 3         | 3     | 3        | 4        | 3        | 4        | 4        | 4       | 4.5     | 4.5      |
| 399 | 3       | 3       | 3      | 3         | 4     | 3        | 3        | 3        | 4        | 2        | 2       | 5       | 5        |
| 400 | 4       | 3       | 3      | 3         | 3     | 2        | 4        | 4        | 4        | 4        | 3       | 3.5     | 3.5      |
| 401 | 4       | 1       | 3      | 4         | 3     | 2        | 5        | 5        | 4        | 2        | 3       | 5       | 5        |
| 402 | 4       | 3       | 3      | 4         | 4     | 4        | 5        | 4        | 4        | 3        | 5       | 5       | 4.5      |
| 403 | 3       | 2       | 4      | 2         | 3     | 2        | 4        | 4        | 4        | 4        | 4       | 2.5     | 1.5      |
| 404 | 4       | 2       | 2      | 3         | 3     | 3        | 4        | 3        | 4        | 4        | 3       | 5       | 5        |
| 405 | 4       | 3       | 3      | 3         | 3     | 3        | 5        | 3        | 4        | 3        | 3       | 2       | 2.5      |
| 406 | 3       | 2       | 4      | 3         | 2     | 4        | 4        | 3        | 4        | 3        | 3       | 5       | 5        |
| 407 | 3       | 4       | 3      | 2         | 4     | 2        | 4        | 1        | 4        | 3        | 4       | 5       | 4.5      |
| 408 | 4       | 2       | 4      | 3         | 3     | 3        | 5        | 3        | 4        | 4        | 3       | 3       | 2        |

| ID  | genjs_1 | LEAVE_1 | INCM_1 | BENEFIT_1 | LRN_1 | CAREER_1 | PEERRELA | RESPECTS | SECURE_1 | PARTIRES | HONOR_1 | INCOME5 | BENEFIT5 |
|-----|---------|---------|--------|-----------|-------|----------|----------|----------|----------|----------|---------|---------|----------|
| 409 | 3       | 3       | 3      | 3         | 3     | 3        | 4        | 4        | 4        | 3        | 3       | 4       | 4.5      |
| 410 | 4       | 1       | 3      | 4         | 3     | 2        | 5        | 5        | 4        | 2        | 3       | 5       | 5        |
| 411 | 4       | 2       | 2      | 4         | 4     | 3        | 5        | 4        | 5        | 4        | 4       | 4.5     | 4.5      |
| 412 | 2       | 3       | 2      | 3         | 3     | 3        | 5        | 4        | 3        | 4        | 3       | 5       | 5        |
| 413 | 5       | 2       | 4      | 4         | 4     | 3        | 5        | 5        | 4        | 4        | 4       | 3.5     | 3.5      |
| 414 | 3       | 4       | 3      | 3         | 4     | 3        | 4        | 4        | 3        | 3        | 3       | 5       | 5        |
| 415 | 3       | 3       | 2      | 3         | 4     | 3        | 4        | 3        | 4        | 4        | 3       | 5       | 5        |
| 416 | 4       | 1       | 5      | 4         | 4     | 4        | 5        | 4        | 4        | 4        | 4       | 4.5     | 5        |
| 417 | 5       | 1       | 1      | 4         | 3     | 4        | 5        | 4        | 4        | 5        | 4       | 5       | 5        |
| 418 | 5       | 1       | 2      | 4         | 4     | 4        | 4        | 4        | 4        | 4        | 4       | 4.5     | 4.5      |
| 419 | 5       | 1       | 3      | 5         | 5     | 5        | 5        | 5        | 4        | 5        | 5       | 4.5     | 4.5      |
| 420 | 4       | 1       | 3      | 3         | 4     | 3        | 5        | 4        | 4        | 4        | 4       | 2.5     | 2.5      |
| 421 | 3       | 4       | 3      | 3         | 2     | 2        | 3        | 4        | 2        | 4        | 3       | 5       | 4.5      |
| 422 | 4       | 2       | 3      | 3         | 4     | 2        | 4        | 4        | 4        | 4        | 4       | 4.5     | 4        |
| 423 | 4       | 1       | 3      | 4         | 2     | 3        | 5        | 5        | 4        | 4        | 4       | 4       | 4        |
| 424 | 3       | 3       | 3      | 4         | 3     | 3        | 3        | 3        | 3        | 3        | 3       | 4       | 4        |
| 425 | 2       | 3       | 2      | 2         | 3     | 1        | 5        | 4        | 3        | 2        | 2       | 5       | 5        |
| 426 | 4       | 2       | 3      | 3         | 3     | 3        | 4        | 4        | 5        | 4        | 3       | 3       | 1.5      |
| 427 | 4       | 2       | 3      | 4         | 4     | 4        | 5        | 4        | 4        | 5        | 4       | 4       | 5        |
| 428 | 4       | 2       | 3      | 4         | 4     | 4        | 4        | 4        | 4        | 4        | 4       | 4       | 4        |
| 429 | 5       | 1       | 3      | 4         | 4     | 5        | 4        | 4        | 4        | 4        | 4       | 5       | 5        |
| 430 | 5       | 2       | 3      | 3         | 3     | 3        | 5        | 4        | 5        | 4        | 4       | 4       | 4        |
| 431 | 4       | 1       | 3      | 4         | 4     | 4        | 4        | 4        | 4        | 4        | 4       | 3.5     | 3        |
| 432 | 4       | 2       | 3      | 3         | 3     | 3        | 4        | 4        | 4        | 2        | 3       | 4.5     | 4        |
| 433 | 3       | 1       | 2      | 4         | 4     | 1        | 4        | 4        | 3        | 4        | 3       | 1.5     | 2.5      |
| 434 | 4       | 3       | 3      | 4         | 4     | 3        | 4        | 4        | 4        | 4        | 3       | 3       | 3.5      |
| 435 | 4       | 2       | 2      | 4         | 5     | 3        | 5        | 5        | 4        | 4        | 4       | 5       | 5        |
| 436 | 4       | 2       | 2      | 3         | 4     | 4        | 4        | 3        | 4        | 2        | 4       | 3       | 3.5      |
| 437 | 4       | 3       | 3      | 4         | 4     | 3        | 4        | 4        | 4        | 3        | 3       | 4.5     | 4.5      |
| 438 | 4       | 2       | 2      | 3         | 4     | 5        | 5        | 4        | 4        | 4        | 3       | 4       | 4        |
| 439 | 4       | 2       | 2      | 4         | 4     | 3        | 5        | 5        | 2        | 4        | 4       | 5       | 5        |
| 440 | 4       | 2       | 2      | 4         | 4     | 4        | 4        | 4        | 4        | 4        | 4       | 3       | 2.5      |
| 441 | 4       | 3       | 4      | 3         | 3     | 2        | 4        | 4        | 3        | 2        | 3       | 3.5     | 3.5      |
| 442 | 4       | 3       | 1      | 3         | 4     | 3        | 4        | 4        | 3        | 4        | 4       | 4.5     | 4.5      |

| ID  | genjs_1 | LEAVE_1 | INCM_1 | BENEFIT_1 | LRN_1 | CAREER_1 | PEERRELA | RESPECTS | SECURE_1 | PARTIRES | HONOR_1 | INCOME5 | BENEFIT5 |
|-----|---------|---------|--------|-----------|-------|----------|----------|----------|----------|----------|---------|---------|----------|
| 443 | 3       | 3       | 2      | 3         | 4     | 3        | 4        | 4        | 2        | 2        | 3       | 5       | 5        |
| 444 | 4       | 1       | 4      | 3         | 3     | 3        | 5        | 3        | 4        | 4        | 4       | 4       | 3        |
| 445 | 4       | 3       | 4      | 3         | 3     | 3        | 5        | 4        | 4        | 2        | 3       | 3.5     | 2.5      |
| 446 | 4       | 2       | 3      | 3         | 3     | 3        | 5        | 4        | 3        | 4        | 4       | 3       | 3.5      |
| 447 | 3       | 2       | 3      | 3         | 3     | 3        | 4        | 4        | 4        | 4        | 3       | 4       | 4.5      |
| 448 | 3       | 1       | 3      | 3         | 3     | 3        | 4        | 3        | 1        | 4        | 4       | 5       | 5        |
| 449 | 4       | 5       | 3      | 2         | 3     | 2        | 5        | 4        | 4        | 2        | 2       | 5       | 4.5      |
| 450 | 4       | 3       | 3      | 3         | 3     | 3        | 4        | 3        | 3        | 4        | 4       | 4       | 4.5      |
| 451 | 4       | 1       | 2      | 2         | 3     | 1        | 5        | 4        | 4        | 4        | 3       | 2.5     | 1        |
| 452 | 3       | 3       | 3      | 1         | 1     | 1        | 4        | 3        | 3        | 2        | 2       | 3.5     | 2.5      |
| 453 | 3       | 2       | 3      | 2         | 3     | 3        | 4        | 4        | 4        | 4        | 3       | 3       | 1.5      |
| 454 | 4       | 2       | 3      | 3         | 3     | 3        | 4        | 4        | 4        | 4        | 3       | 5       | 5        |
| 455 | 4       | 3       | 2      | 4         | 4     | 3        | 5        | 3        | 3        | 4        | 3       | 3       | 3.5      |
| 456 | 3       | 3       | 3      | 3         | 4     | 3        | 5        | 3        | 4        | 3        | 3       | 2.5     | 1        |
| 457 | 4       | 3       | 2      | 3         | 3     | 4        | 5        | 5        | 4        | 4        | 4       | 3       | 3        |
| 458 | 3       | 2       | 2      | 3         | 3     | 3        | 4        | 4        | 4        | 4        | 4       | 5       | 2.5      |
| 459 | 4       | 2       | 3      | 3         | 4     | 2        | 4        | 4        | 4        | 4        | 3       | 5       | 5        |
| 460 | 3       | 4       | 3      | 2         | 4     | 3        | 4        | 3        | 3        | 3        | 3       | 2       | 0.5      |
| 461 | 4       | 2       | 2      | 2         | 3     | 3        | 4        | 3        | 3        | 5        | 3       | 3       | 1.5      |
| 462 | 3       | 3       | 3      | 1         | 4     | 2        | 5        | 5        | 3        | 2        | 3       | 5       | 4        |
| 463 | 4       | 2       | 3      | 3         | 4     | 3        | 1        | 5        | 4        | 1        | 3       | 2.5     | 2.5      |
| 464 | 4       | 2       | 2      | 3         | 4     | 3        | 5        | 5        | 4        | 3        | 4       | 2.5     | 2.5      |
| 465 | 4       | 2       | 3      | 3         | 3     | 3        | 5        | 5        | 4        | 4        | 5       | 5       | 4.5      |
| 466 | 3       | 3       | 1      | 3         | 3     | 3        | 5        | 4        | 3        | 3        | 3       | 5       | 4        |
| 467 | 4       | 3       | 3      | 3         | 4     | 4        | 4        | 4        | 4        | 4        | 4       | 3.5     | 3.5      |
| 468 | 3       | 2       | 3      | 3         | 4     | 4        | 5        | 4        | 4        | 4        | 3       | 5       | 5        |
| 469 | 4       | 2       | 3      | 3         | 3     | 4        | 4        | 4        | 4        | 4        | 4       | 3       | 3        |
| 470 | 3       | 2       | 3      | 3         | 3     | 3        | 3        | 4        | 3        | 4        | 3       | 4       | 3.5      |
| 471 | 3       | 3       | 3      | 3         | 3     | 3        | 4        | 4        | 3        | 1        | 3       | 4.5     | 2.5      |
| 472 | 4       | 3       | 3      | 3         | 3     | 2        | 3        | 4        | 3        | 4        | 3       | 3.5     | 4        |
| 473 | 4       | 2       | 2      | 3         | 4     | 4        | 5        | 5        | 4        | 3        | 4       | 2.5     | 5        |
| 474 | 4       | 3       | 3      | 3         | 2     | 3        | 4        | 4        | 4        | 4        | 3       | 4.5     | 2.5      |
| 475 | 3       | 4       | 3      | 3         | 3     | 1        | 3        | 5        | 3        | 3        | 3       | 4.5     | 5        |
| 476 | 4       | 3       | 3      | 2         | 1     | 2        | 4        | 4        | 4        | 2        | 3       | 4       | 4        |

| ID  | genjs_1 | LEAVE_1 | INCM_1 | BENEFIT_1 | LRN_1 | CAREER_1 | PEERRELA | RESPECTS | SECURE_1 | PARTIRES | HONOR_1 | INCOME5 | BENEFIT5 |
|-----|---------|---------|--------|-----------|-------|----------|----------|----------|----------|----------|---------|---------|----------|
| 477 | 3       | 4       | 3      | 1         | 3     | 3        | 5        | 4        | 3        | 3        | 3       | 2.5     | 1.5      |
| 478 | 5       | 1       | 3      | 3         | 4     | 3        | 4        | 4        | 4        | 4        | 4       | 5       | 4        |
| 479 | 3       | 2       | 3      | 3         | 3     | 3        | 4        | 4        | 4        | 3        | 2       | 4.5     | 4.5      |
| 480 | 4       | 1       | 2      | 2         | 5     | 4        | 5        | 5        | 2        | 5        | 4       | 3.5     | 5        |
| 481 | 4       | 3       | 2      | 5         | 3     | 3        | 4        | 4        | 2        | 2        | 3       | 5       | 5        |
| 482 | 5       | 1       | 2      | 3         | 4     | 3        | 4        | 4        | 4        | 4        | 4       | 4.5     | 4        |
| 483 | 5       | 4       | 1      | 1         | 3     | 1        | 5        | 4        | 3        | 3        | 2       | 5       | 4        |
| 484 | 3       | 3       | 3      | 2         | 3     | 3        | 4        | 4        | 3        | 3        | 3       | 1.5     | 0.5      |
| 485 | 5       | 4       | 1      | 1         | 3     | 2        | 4        | 4        | 3        | 4        | 2       | 3       | 3.5      |
| 486 | 4       | 2       | 2      | 3         | 3     | 2        | 4        | 3        | 2        | 4        | 4       | 5       | 5        |
| 487 | 4       | 4       | 3      | 2         | 2     | 1        | 5        | 4        | 3        | 2        | 3       | 4.5     | 3        |
| 488 | 3       | 4       | 1      | 2         | 4     | 1        | 4        | 4        | 3        | 3        | 2       | 0.5     | 0.5      |
| 489 | 3       | 2       | 2      | 2         | 3     | 3        | 4        | 4        | 4        | 4        | 3       | 5       | 5        |
| 490 | 4       | 3       | 2      | 3         | 3     | 3        | 4        | 4        | 3        | 2        | 3       | 5       | 5        |
| 491 | 3       | 2       | 2      | 2         | 3     | 3        | 4        | 4        | 4        | 1        | 2       | 5       | 5        |
| 492 | 5       | 4       | 1      | 3         | 4     | 3        | 3        | 4        | 5        | 4        | 3       | 5       | 5        |
| 493 | 4       | 3       | 3      | 3         | 2     | 1        | 4        | 4        | 4        | 4        | 4       | 3.5     | 3        |
| 494 | 4       | 2       | 4      | 4         | 4     | 3        | 3        | 3        | 3        | 4        | 4       | 4       | 2        |
| 495 | 3       | 4       | 2      | 1         | 2     | 1        | 4        | 1        | 1        | 4        | 3       | 5       | 5        |
| 496 | 4       | 2       | 4      | 3         | 3     | 4        | 4        | 4        | 4        | 4        | 4       | 3       | 3        |
| 497 | 3       | 2       | 3      | 4         | 3     | 3        | 3        | 3        | 3        | 2        | 3       | 1.5     | 2.5      |
| 498 | 4       | 3       | 3      | 4         | 4     | 4        | 5        | 4        | 4        | 4        | 4       | 4       | 3.5      |
| 499 | 5       | 3       | 2      | 3         | 3     | 4        | 5        | 5        | 4        | 4        | 4       | 3.5     | 4        |
| 500 | 4       | 2       | 2      | 4         | 4     | 4        | 4        | 4        | 4        | 4        | 2       | 4       | 4        |
| 501 | 3       | 2       | 1      | 2         | 3     | 1        | 4        | 4        | 4        | 3        | 1       | 5       | 5        |
| 502 | 4       | 3       | 3      | 3         | 3     | 4        | 5        | 4        | 4        | 4        | 4       | 5       | 5        |
| 503 | 3       | 3       | 1      | 1         | 3     | 2        | 5        | 5        | 2        | 3        | 3       | 3       | 4.5      |
| 504 | 3       | 3       | 3      | 3         | 3     | 2        | 4        | 3        | 4        | 3        | 3       | 5       | 4.5      |
| 505 | 4       | 2       | 1      | 3         | 4     | 2        | 5        | 4        | 3        | 4        | 4       | 4.5     | 5        |
| 506 | 4       | 4       | 1      | 2         | 3     | 1        | 4        | 4        | 4        | 2        | 3       | 5       | 5        |
| 507 | 4       | 2       | 3      | 3         | 3     | 3        | 4        | 3        | 3        | 4        | 4       | 5       | 5        |
| 508 | 3       | 3       | 3      | 3         | 3     | 3        | 3        | 3        | 2        | 1        | 4       | 2.5     | 2.5      |
| 509 | 3       | 3       | 2      | 2         | 3     | 2        | 4        | 4        | 4        | 2        | 3       | 5       | 5        |
| 510 | 3       | 3       | 2      | 2         | 2     | 2        | 4        | 4        | 3        | 4        | 3       | 5       | 5        |

| ID  | genjs_1 | LEAVE_1 | INCM_1 | BENEFIT_1 | LRN_1 | CAREER_1 | PEERRELA | RESPECTS | SECURE_1 | PARTIRES | HONOR_1 | INCOME5 | BENEFIT5 |
|-----|---------|---------|--------|-----------|-------|----------|----------|----------|----------|----------|---------|---------|----------|
| 511 | 3       | 1       | 1      | 3         | 2     | 2        | 4        | 4        | 4        | 2        | 2       | 2.5     | 2.5      |
| 512 | 3       | 3       | 2      | 3         | 4     | 2        | 4        | 3        | 4        | 4        | 3       | 5       | 4        |
| 513 | 2       | 3       | 1      | 2         | 2     | 2        | 3        | 3        | 3        | 3        | 2       | 5       | 5        |
| 514 | 4       | 1       | 2      | 4         | 3     | 4        | 4        | 4        | 4        | 4        | 4       | 5       | 4.5      |
| 515 | 2       | 2       | 2      | 3         | 3     | 1        | 5        | 5        | 3        | 4        | 3       | 5       | 5        |
| 516 | 4       | 2       | 1      | 3         | 4     | 1        | 5        | 3        | 4        | 4        | 4       | 3.5     | 4        |
| 517 | 5       | 1       | 4      | 4         | 4     | 3        | 5        | 4        | 5        | 4        | 3       | 3       | 3        |
| 518 | 4       | 2       | 3      | 4         | 3     | 1        | 3        | 4        | 4        | 4        | 3       | 3.5     | 4        |
| 519 | 4       | 3       | 3      | 3         | 3     | 3        | 4        | 3        | 3        | 4        | 3       | 2.5     | 4        |
| 520 | 4       | 2       | 3      | 4         | 4     | 3        | 5        | 4        | 3        | 4        | 4       | 4       | 4.5      |
| 521 | 2       | 4       | 3      | 3         | 3     | 2        | 4        | 3        | 4        | 3        | 3       | 2.5     | 3        |
| 522 | 5       | 1       | 3      | 4         | 3     | 3        | 4        | 4        | 5        | 5        | 4       | 3.5     | 3        |
| 523 | 3       | 3       | 3      | 3         | 3     | 3        | 3        | 4        | 3        | 2        | 3       | 3       | 3        |
| 524 | 4       | 2       | 4      | 5         | 5     | 4        | 4        | 4        | 4        | 4        | 4       | 5       | 5        |
| 525 | 4       | 2       | 3      | 4         | 4     | 4        | 4        | 4        | 4        | 4        | 3       | 5       | 5        |
| 526 | 4       | 2       | 3      | 4         | 4     | 3        | 3        | 3        | 3        | 4        | 4       | 3.5     | 3.5      |
| 527 | 4       | 3       | 3      | 3         | 3     | 2        | 4        | 3        | 4        | 2        | 4       | 3.5     | 4        |
| 528 | 4       | 4       | 2      | 4         | 3     | 3        | 5        | 4        | 4        | 5        | 4       | 3       | 4        |
| 529 | 3       | 2       | 3      | 3         | 3     | 3        | 5        | 4        | 4        | 4        | 3       | 2.5     | 1.5      |
| 530 | 4       | 2       | 3      | 4         | 4     | 4        | 5        | 4        | 4        | 4        | 3       | 5       | 5        |
| 531 | 4       | 2       | 2      | 3         | 4     | 3        | 5        | 4        | 4        | 4        | 4       | 5       | 5        |
| 532 | 5       | 1       | 3      | 4         | 5     | 4        | 5        | 4        | 5        | 5        | 4       | 5       | 5        |
| 533 | 4       | 4       | 2      | 5         | 4     | 3        | 4        | 4        | 4        | 5        | 3       | 5       | 5        |
| 534 | 3       | 2       | 2      | 3         | 4     | 3        | 5        | 4        | 4        | 3        | 3       | 1.5     | 2.5      |
| 535 | 3       | 3       | 2      | 4         | 3     | 1        | 4        | 4        | 4        | 2        | 3       | 5       | 5        |
| 536 | 3       | 2       | 3      | 3         | 3     | 1        | 4        | 3        | 2        | 2        | 3       | 2.5     | 2.5      |
| 537 | 4       | 3       | 3      | 4         | 4     | 2        | 4        | 3        | 4        | 3        | 2       | 2.5     | 5        |
| 538 | 4       | 4       | 3      | 4         | 3     | 3        | 5        | 4        | 4        | 5        | 4       | 5       | 4.5      |
| 539 | 5       | 1       | 4      | 4         | 5     | 4        | 5        | 5        | 4        | 5        | 5       | 4.5     | 4.5      |
| 540 | 3       | 3       | 3      | 4         | 3     | 1        | 4        | 4        | 3        | 4        | 3       | 2.5     | 2.5      |
| 541 | 4       | 3       | 2      | 3         | 3     | 3        | 3        | 3        | 4        | 4        | 3       | 2.5     | 2.5      |
| 542 | 4       | 4       | 2      | 4         | 3     | 3        | 5        | 4        | 4        | 5        | 4       | 5       | 5        |
| 543 | 4       | 4       | 2      | 4         | 3     | 3        | 4        | 4        | 4        | 5        | 4       | 3.5     | 4        |
| 544 | 5       | 1       | 4      | 5         | 4     | 5        | 5        | 4        | 5        | 5        | 5       | 5       | 5        |



| ID  | genjs_1 | LEAVE_1 | INCM_1 | BENEFIT_1 | LRN_1 | CAREER_1 | PEERRELA | RESPECTS | SECURE_1 | PARTIRES | HONOR_1 | INCOME5 | BENEFIT5 |
|-----|---------|---------|--------|-----------|-------|----------|----------|----------|----------|----------|---------|---------|----------|
| 545 | 5       | 1       | 4      | 4         | 4     | 3        | 5        | 4        | 4        | 5        | 4       | 5       | 5        |
| 546 | 3       | 3       | 3      | 3         | 3     | 1        | 5        | 3        | 4        | 3        | 2       | 3.5     | 3        |
| 547 | 4       | 2       | 3      | 3         | 4     | 3        | 4        | 4        | 4        | 4        | 3       | 2.5     | 2.5      |
| 548 | 3       | 3       | 4      | 4         | 4     | 2        | 4        | 4        | 3        | 2        | 3       | 4       | 4.5      |
| 549 | 5       | 3       | 3      | 3         | 4     | 4        | 5        | 4        | 4        | 4        | 5       | 5       | 4        |
| 550 | 3       | 3       | 3      | 3         | 3     | 3        | 3        | 3        | 4        | 4        | 3       | 3       | 3        |
| 551 | 4       | 3       | 2      | 3         | 3     | 3        | 3        | 3        | 4        | 4        | 3       | 4.5     | 4.5      |
| 552 | 3       | 2       | 3      | 4         | 3     | 3        | 4        | 4        | 4        | 3        | 4       | 2.5     | 2.5      |
| 553 | 4       | 2       | 3      | 3         | 3     | 3        | 4        | 4        | 4        | 4        | 3       | 3       | 3.5      |
| 554 | 4       | 2       | 3      | 3         | 3     | 3        | 4        | 3        | 2        | 4        | 3       | 4       | 4        |
| 555 | 4       | 2       | 3      | 3         | 4     | 3        | 4        | 3        | 3        | 3        | 4       | 0.5     | 0.5      |
| 556 | 4       | 2       | 3      | 4         | 4     | 3        | 5        | 3        | 4        | 4        | 3       | 2.5     | 2.5      |
| 557 | 4       | 1       | 2      | 4         | 4     | 4        | 4        | 4        | 3        | 4        | 4       | 2.5     | 2.5      |
| 558 | 3       | 4       | 3      | 3         | 3     | 1        | 5        | 5        | 2        | 1        | 1       | 0.5     | 0.5      |
| 559 | 2       | 4       | 3      | 2         | 3     | 1        | 4        | 3        | 1        | 3        | 3       | 1.5     | 1.5      |
| 560 | 3       | 4       | 1      | 1         | 3     | 3        | 5        | 5        | 3        | 4        | 3       | 1.5     | 0.5      |
| 561 | 4       | 2       | 2      | 3         | 4     | 3        | 4        | 4        | 3        | 4        | 2       | 1       | 0.5      |
| 562 | 3       | 3       | 4      | 4         | 3     | 3        | 5        | 4        | 4        | 2        | 3       | 4.5     | 4.5      |
| 563 | 3       | 3       | 1      | 4         | 3     | 3        | 4        | 3        | 4        | 3        | 3       | 4.5     | 4        |
| 564 | 3       | 3       | 3      | 3         | 3     | 3        | 4        | 3        | 4        | 4        | 3       | 3.5     | 4        |
| 565 | 4       | 2       | 3      | 4         | 4     | 3        | 5        | 5        | 3        | 2        | 4       | 4       | 4        |
| 566 | 3       | 4       | 3      | 3         | 4     | 4        | 4        | 5        | 3        | 4        | 4       | 3.5     | 3        |
| 567 | 4       | 2       | 3      | 4         | 4     | 3        | 4        | 4        | 3        | 4        | 3       | 4       | 4        |
| 568 | 2       | 5       | 3      | 2         | 1     | 3        | 3        | 3        | 3        | 3        | 2       | 5       | 5        |
| 569 | 3       | 3       | 3      | 4         | 3     | 3        | 4        | 4        | 4        | 4        | 3       | 5       | 5        |
| 570 | 4       | 4       | 2      | 5         | 4     | 3        | 4        | 4        | 4        | 3        | 4       | 4       | 3.5      |
| 571 | 3       | 3       | 3      | 3         | 3     | 3        | 4        | 3        | 4        | 3        | 3       | 5       | 5        |
| 572 | 5       | 2       | 3      | 5         | 4     | 3        | 5        | 5        | 4        | 5        | 4       | 2.5     | 4        |
| 573 | 3       | 1       | 3      | 3         | 3     | 3        | 3        | 3        | 3        | 3        | 3       | 1.5     | 2.5      |
| 574 | 4       | 2       | 1      | 3         | 3     | 4        | 5        | 4        | 3        | 4        | 2       | 5       | 2.5      |
| 575 | 3       | 3       | 2      | 3         | 3     | 3        | 4        | 4        | 3        | 2        | 3       | 5       | 5        |
| 576 | 4       | 2       | 3      | 3         | 4     | 3        | 4        | 4        | 4        | 5        | 4       | 5       | 5        |
| 577 | 4       | 2       | 3      | 5         | 4     | 4        | 5        | 4        | 5        | 4        | 5       | 4       | 4        |
| 578 | 3       | 3       | 3      | 3         | 4     | 3        | 4        | 4        | 4        | 4        | 3       | 2.5     | 2.5      |

| ID  | genjs_1 | LEAVE_1 | INCM_1 | BENEFIT_1 | LRN_1 | CAREER_1 | PEERRELA | RESPECTS | SECURE_1 | PARTIRES | HONOR_1 | INCOME5 | BENEFIT5 |
|-----|---------|---------|--------|-----------|-------|----------|----------|----------|----------|----------|---------|---------|----------|
| 579 | 4       | 2       | 2      | 4         | 4     | 3        | 5        | 5        | 4        | 4        | 4       | 4.5     | 5        |
| 580 | 3       | 4       | 3      | 2         | 3     | 2        | 5        | 4        | 3        | 4        | 3       | 5       | 5        |
| 581 | 2       | 3       | 4      | 2         | 2     | 3        | 5        | 4        | 5        | 4        | 5       | 5       | 5        |
| 582 | 3       | 3       | 3      | 3         | 2     | 3        | 5        | 3        | 5        | 4        | 4       | 5       | 5        |
| 583 | 3       | 4       | 3      | 3         | 2     | 2        | 4        | 3        | 4        | 2        | 2       | 3       | 3        |
| 584 | 4       | 2       | 4      | 3         | 4     | 3        | 4        | 4        | 4        | 4        | 3       | 5       | 3        |
| 585 | 4       | 2       | 3      | 2         | 3     | 3        | 5        | 4        | 5        | 3        | 4       | 4.5     | 3.5      |
| 586 | 5       | 4       | 3      | 3         | 3     | 1        | 3        | 3        | 2        | 3        | 3       | 5       | 3        |
| 587 | 4       | 2       | 3      | 3         | 3     | 3        | 5        | 4        | 5        | 3        | 3       | 2       | 1.5      |
| 588 | 4       | 3       | 3      | 3         | 4     | 3        | 4        | 4        | 4        | 3        | 4       | 5       | 4.5      |
| 589 | 4       | 2       | 3      | 3         | 3     | 2        | 5        | 2        | 4        | 2        | 3       | 5       | 4.5      |
| 590 | 4       | 2       | 3      | 3         | 3     | 3        | 5        | 3        | 1        | 3        | 3       | 3.5     | 3        |
| 591 | 5       | 1       | 3      | 2         | 3     | 3        | 5        | 4        | 5        | 4        | 4       | 4.5     | 3        |
| 592 | 5       | 1       | 3      | 4         | 3     | 1        | 4        | 3        | 2        | 4        | 3       | 5       | 5        |
| 593 | 4       | 2       | 1      | 1         | 2     | 3        | 4        | 4        | 4        | 2        | 3       | 3.5     | 3.5      |
| 594 | 3       | 2       | 3      | 3         | 3     | 3        | 5        | 4        | 4        | 4        | 3       | 3.5     | 3        |
| 595 | 3       | 2       | 1      | 1         | 1     | 1        | 4        | 4        | 4        | 1        | 3       | 2.5     | 3.5      |
| 596 | 2       | 4       | 2      | 2         | 3     | 3        | 5        | 4        | 3        | 4        | 3       | 1       | 0.5      |
| 597 | 4       | 2       | 3      | 1         | 3     | 3        | 5        | 3        | 4        | 5        | 4       | 5       | 4.5      |
| 598 | 5       | 3       | 3      | 4         | 5     | 3        | 5        | 5        | 4        | 5        | 4       | 4       | 4        |
| 599 | 3       | 2       | 2      | 1         | 2     | 1        | 4        | 4        | 2        | 2        | 2       | 4.5     | 4.5      |
| 600 | 1       | 4       | 1      | 1         | 3     | 3        | 5        | 1        | 1        | 2        | 5       | 4.5     | 0.5      |
| 601 | 4       | 2       | 3      | 4         | 4     | 4        | 4        | 3        | 4        | 4        | 4       | 4       | 4        |
| 602 | 2       | 5       | 1      | 1         | 2     | 2        | 5        | 4        | 4        | 1        | 1       | 4.5     | 4.5      |
| 603 | 3       | 3       | 3      | 2         | 3     | 1        | 5        | 4        | 5        | 3        | 4       | 4       | 3.5      |
| 604 | 4       | 2       | 2      | 3         | 4     | 2        | 4        | 3        | 3        | 4        | 3       | 4.5     | 4.5      |
| 605 | 1       | 4       | 1      | 1         | 4     | 2        | 5        | 3        | 1        | 2        | 4       | 3       | 1        |
| 606 | 5       | 1       | 3      | 2         | 4     | 3        | 5        | 4        | 5        | 4        | 3       | 4.5     | 3        |
| 607 | 3       | 3       | 3      | 2         | 2     | 1        | 5        | 4        | 4        | 1        | 4       | 5       | 5        |
| 608 | 3       | 2       | 4      | 3         | 4     | 3        | 4        | 4        | 4        | 2        | 3       | 5       | 5        |
| 609 | 4       | 3       | 2      | 1         | 2     | 1        | 4        | 4        | 2        | 1        | 2       | 2.5     | 2.5      |
| 610 | 4       | 2       | 2      | 3         | 4     | 2        | 4        | 3        | 3        | 4        | 3       | 4.5     | 4.5      |
| 611 | 3       | 3       | 3      | 3         | 3     | 3        | 4        | 4        | 4        | 3        | 3       | 4.5     | 2.5      |
| 612 | 3       | 3       | 3      | 3         | 3     | 3        | 4        | 3        | 4        | 3        | 3       | 5       | 3.5      |

| ID  | genjs_1 | LEAVE_1 | INCM_1 | BENEFIT_1 | LRN_1 | CAREER_1 | PEERRELA | RESPECTS | SECURE_1 | PARTIRES | HONOR_1 | INCOME5 | BENEFIT5 |
|-----|---------|---------|--------|-----------|-------|----------|----------|----------|----------|----------|---------|---------|----------|
| 613 | 4       | 3       | 3      | 3         | 5     | 3        | 5        | 4        | 4        | 2        | 4       | 4.5     | 5        |
| 614 | 4       | 3       | 3      | 3         | 3     | 1        | 4        | 4        | 2        | 2        | 3       | 2       | 1        |
| 615 | 3       | 2       | 4      | 3         | 4     | 2        | 4        | 4        | 2        | 2        | 3       | 5       | 5        |
| 616 | 4       | 2       | 2      | 3         | 3     | 3        | 5        | 5        | 4        | 3        | 3       | 3.5     | 2.5      |
| 617 | 3       | 1       | 3      | 3         | 3     | 2        | 3        | 4        | 3        | 2        | 3       | 2       | 2        |
| 618 | 3       | 2       | 3      | 3         | 3     | 4        | 4        | 4        | 4        | 4        | 3       | 4       | 4        |
| 619 | 3       | 3       | 3      | 3         | 3     | 3        | 4        | 4        | 4        | 3        | 3       | 2.5     | 2.5      |
| 620 | 5       | 2       | 2      | 4         | 3     | 3        | 5        | 5        | 4        | 4        | 4       | 4.5     | 4.5      |
| 621 | 4       | 3       | 4      | 4         | 5     | 3        | 5        | 4        | 4        | 4        | 5       | 4.5     | 4        |
| 622 | 3       | 4       | 3      | 2         | 3     | 2        | 4        | 4        | 2        | 3        | 3       | 3.5     | 1        |
| 623 | 3       | 4       | 3      | 2         | 1     | 1        | 4        | 3        | 4        | 2        | 2       | 5       | 5        |
| 624 | 3       | 3       | 1      | 2         | 3     | 3        | 4        | 4        | 1        | 4        | 2       | 4.5     | 3.5      |
| 625 | 4       | 4       | 3      | 3         | 4     | 3        | 5        | 3        | 4        | 2        | 3       | 0.5     | 1.5      |
| 626 | 3       | 4       | 3      | 4         | 3     | 3        | 4        | 4        | 4        | 5        | 3       | 3       | 3.5      |
| 627 | 4       | 3       | 3      | 3         | 3     | 3        | 4        | 4        | 4        | 2        | 3       | 5       | 5        |
| 628 | 4       | 4       | 3      | 2         | 4     | 3        | 4        | 4        | 4        | 4        | 2       | 4.5     | 4.5      |
| 629 | 3       | 3       | 2      | 2         | 3     | 1        | 4        | 3        | 3        | 4        | 3       | 4       | 4        |
| 630 | 4       | 4       | 4      | 4         | 3     | 3        | 4        | 4        | 4        | 5        | 3       | 4       | 5        |
| 631 | 3       | 3       | 3      | 2         | 2     | 3        | 3        | 5        | 4        | 3        | 3       | 4.5     | 5        |
| 632 | 4       | 3       | 3      | 2         | 4     | 3        | 5        | 4        | 4        | 4        | 2       | 2.5     | 5        |
| 633 | 4       | 2       | 4      | 4         | 4     | 3        | 4        | 4        | 4        | 4        | 3       | 4       | 2.5      |
| 634 | 2       | 2       | 3      | 4         | 3     | 3        | 4        | 4        | 4        | 3        | 4       | 4.5     | 4.5      |
| 635 | 3       | 2       | 3      | 1         | 2     | 2        | 4        | 3        | 4        | 3        | 2       | 5       | 4        |
| 636 | 3       | 2       | 2      | 1         | 3     | 3        | 5        | 4        | 4        | 3        | 3       | 0.5     | 0.5      |
| 637 | 4       | 3       | 2      | 4         | 4     | 3        | 4        | 4        | 4        | 4        | 4       | 3.5     | 3.5      |
| 638 | 3       | 2       | 4      | 2         | 3     | 2        | 3        | 4        | 4        | 5        | 3       | 3       | 2.5      |
| 639 | 2       | 3       | 3      | 2         | 3     | 2        | 4        | 3        | 4        | 2        | 3       | 2.5     | 2.5      |
| 640 | 5       | 2       | 2      | 2         | 2     | 1        | 4        | 4        | 4        | 5        | 3       | 5       | 5        |
| 641 | 4       | 1       | 3      | 3         | 3     | 3        | 4        | 3        | 3        | 4        | 4       | 2.5     | 1        |
| 642 | 2       | 3       | 4      | 2         | 4     | 2        | 4        | 4        | 5        | 2        | 3       | 5       | 5        |
| 643 | 3       | 3       | 3      | 2         | 3     | 2        | 4        | 4        | 3        | 2        | 3       | 4       | 3        |
| 644 | 3       | 2       | 3      | 2         | 3     | 2        | 3        | 4        | 4        | 3        | 3       | 4.5     | 5        |
| 645 | 3       | 3       | 3      | 3         | 3     | 2        | 4        | 3        | 3        | 3        | 3       | 4       | 1        |
| 646 | 3       | 3       | 3      | 3         | 3     | 3        | 4        | 3        | 4        | 3        | 3       | 4       | 3.5      |

| ID  | genjs_1 | LEAVE_1 | INCM_1 | BENEFIT_1 | LRN_1 | CAREER_1 | PEERRELA | RESPECTS | SECURE_1 | PARTIRES | HONOR_1 | INCOME5 | BENEFIT5 |
|-----|---------|---------|--------|-----------|-------|----------|----------|----------|----------|----------|---------|---------|----------|
| 647 | 4       | 1       | 4      | 3         | 4     | 3        | 5        | 4        | 4        | 3        | 3       | 2.5     | 3        |
| 648 | 3       | 3       | 3      | 2         | 3     | 2        | 4        | 4        | 3        | 3        | 3       | 2.5     | 2.5      |
| 649 | 4       | 2       | 3      | 3         | 3     | 3        | 4        | 4        | 4        | 4        | 4       | 2.5     | 2.5      |
| 650 | 3       | 2       | 3      | 2         | 4     | 3        | 4        | 3        | 4        | 3        | 3       | 5       | 4        |
| 651 | 3       | 2       | 3      | 2         | 5     | 1        | 4        | 4        | 2        | 2        | 1       | 5       | 5        |
| 652 | 3       | 3       | 3      | 3         | 3     | 2        | 4        | 3        | 4        | 4        | 3       | 5       | 5        |
| 653 | 4       | 1       | 3      | 3         | 3     | 3        | 4        | 3        | 3        | 4        | 4       | 2.5     | 1.5      |
| 654 | 3       | 3       | 2      | 3         | 3     | 3        | 4        | 4        | 4        | 3        | 3       | 2.5     | 2.5      |
| 655 | 4       | 1       | 3      | 2         | 3     | 2        | 4        | 4        | 5        | 4        | 4       | 4.5     | 3.5      |
| 656 | 2       | 2       | 4      | 2         | 2     | 2        | 3        | 3        | 4        | 1        | 2       | 5       | 5        |

| ID | LEARN5 | CAREER5 | PEERRELAT | RESPECT5 | SECURE5 | PARTICI5 | HORNOR5 | CAREERfit | INCOMEfit | LEARNfit | BENEFITfit | PARTfit | RESPECTfit |
|----|--------|---------|-----------|----------|---------|----------|---------|-----------|-----------|----------|------------|---------|------------|
| 1  | 4.5    | 4       | 2.5       | 4        | 3.5     | 2.5      | 2.5     | -1        | -1.5      | -1.5     | -1.5       | 1.5     | -1         |
| 2  | 4      | 3.5     | 2         | 3.5      | 2.5     | 3        | 2       | -0.5      | -0.5      | 0        | 0.5        | -1      | -0.5       |
| 3  | 3.5    | 4.5     | 4.5       | 5        | 1.5     | 3        | 2.5     | -1.5      | -1        | 0.5      | 0          | 0       | -1         |
| 4  | 3.5    | 4.5     | 2         | 2        | 0.5     | 4.5      | 2       | -1.5      | -2        | 0.5      | -1.5       | -0.5    | 2          |
| 5  | 3.5    | 4.5     | 5         | 5        | 4       | 3        | 5       | -0.5      | 1.5       | 0.5      | 2.5        | 1       | 0          |
| 6  | 4      | 2.5     | 2.5       | 2.5      | 2.5     | 2.5      | 3.5     | 0.5       | -0.5      | 0        | -1.5       | -1.5    | 1.5        |
| 7  | 4      | 4       | 5         | 5        | 4       | 4        | 4       | -1        | -1        | -1       | 0.5        | -1      | 0          |
| 8  | 5      | 5       | 5         | 4.5      | 4.5     | 4.5      | 4.5     | 0         | -1        | -1       | -0.5       | 0.5     | 0.5        |
| 9  | 4      | 4.5     | 5         | 3        | 1.5     | 3        | 3       | -0.5      | -2.5      | -1       | -2         | 1       | 1          |
| 10 | 5      | 4       | 4         | 2.5      | 2       | 4        | 5       | -3        | -3        | -3       | -3         | -2      | 1.5        |
| 11 | 5      | 4.5     | 5         | 4        | 4       | 4        | 4       | -1.5      | -2        | -2       | -2         | -2      | 0          |
| 12 | 3      | 3       | 5         | 5        | 5       | 2        | 4.5     | 1         | 0         | 1        | 0          | 2       | -1         |
| 13 | 5      | 4       | 5         | 4        | 4.5     | 4.5      | 5       | -1        | -2.5      | -2       | -1.5       | -1.5    | 0          |
| 14 | 2.5    | 3.5     | 3         | 3        | 3       | 2.5      | 2       | -0.5      | 0.5       | 1.5      | 2          | -0.5    | 0          |
| 15 | 4      | 2.5     | 2.5       | 2.5      | 2.5     | 2.5      | 3       | -1.5      | -3        | 1        | -4         | -1.5    | 1.5        |
| 16 | 4      | 4       | 5         | 5        | 5       | 3.5      | 5       | -2        | -2        | -1       | -1         | -1.5    | -1         |
| 17 | 3      | 2.5     | 5         | 5        | 2.5     | 4.5      | 4       | 0.5       | -3        | 1        | 0          | -0.5    | -1         |
| 18 | 4      | 4       | 4         | 5        | 1.5     | 2.5      | 2.5     | -1        | -0.5      | 0        | 0          | 0.5     | -1         |
| 19 | 2.5    | 3       | 3         | 4        | 3.5     | 2.5      | 3.5     | 0         | 0         | -0.5     | 1          | 1.5     | 0          |
| 20 | 4      | 4.5     | 4         | 4.5      | 4       | 4        | 2.5     | -1.5      | -3        | -1       | -2         | 0       | 0.5        |
| 21 | 1      | 1       | 2.5       | 2.5      | 2       | 2.5      | 1       | 1         | 2         | 2        | 1          | -0.5    | 0.5        |
| 22 | 2.5    | 2       | 2.5       | 2.5      | 3       | 2.5      | 1       | 0         | 1         | 0.5      | 0          | -0.5    | 0.5        |
| 23 | 1.5    | 2.5     | 4.5       | 3.5      | 3.5     | 3        | 3       | 1.5       | 1         | 2.5      | 1          | 1       | 0.5        |
| 24 | 4.5    | 4.5     | 4.5       | 4.5      | 4       | 4.5      | 2.5     | -0.5      | 0         | -0.5     | 1.5        | -0.5    | -0.5       |
| 25 | 4      | 4       | 5         | 4.5      | 5       | 4.5      | 4       | -2        | -3        | -2       | -3         | -1.5    | -0.5       |
| 26 | 5      | 5       | 4.5       | 3        | 3       | 3.5      | 4       | -2        | -1        | -1       | -2.5       | -1.5    | 1          |
| 27 | 4      | 5       | 4         | 4        | 4       | 3        | 4       | -3        | -3        | -1       | -2         | 1       | -1         |
| 28 | 4.5    | 5       | 5         | 4.5      | 4       | 4        | 4       | -3        | -2        | -1.5     | -3         | -1      | -1.5       |
| 29 | 3.5    | 0.5     | 4         | 4.5      | 5       | 4        | 5       | 1.5       | 0         | -0.5     | 0          | -1      | -0.5       |
| 30 | 3.5    | 4       | 4.5       | 5        | 5       | 5        | 5       | -1        | -3        | -0.5     | -2         | -4      | -3         |
| 31 | 4.5    | 4.5     | 4.5       | 4        | 5       | 4.5      | 5       | -1.5      | -0.5      | -1.5     | -1         | -0.5    | -1         |
| 32 | 2.5    | 2       | 3.5       | 3.5      | 3.5     | 2.5      | 3       | 1         | 0         | 0.5      | 0          | 1.5     | -0.5       |
| 33 | 4.5    | 4.5     | 3.5       | 4        | 3       | 4        | 2       | -1.5      | -3        | -1.5     | -1.5       | -1      | 0          |
| 34 | 4      | 3.5     | 5         | 3.5      | 3.5     | 3.5      | 3.5     | -0.5      | -2        | 0        | -2         | -0.5    | 0.5        |

| ID | LEARN5 | CAREER5 | PEERRELA | RESPECT5 | SECURE5 | PARTICI5 | HORNOR5 | CAREERfi | INCOMEfi | LEARNfi | BENEFITfi | PARTfi | RESPECTfi |
|----|--------|---------|----------|----------|---------|----------|---------|----------|----------|---------|-----------|--------|-----------|
| 35 | 4      | 4.5     | 5        | 5        | 5       | 4.5      | 4.5     | -1.5     | -3       | -1      | -2        | -0.5   | -1        |
| 36 | 3      | 1.5     | 3        | 3        | 2.5     | 2.5      | 1.5     | 1.5      | -2       | 0       | -3        | 1.5    | 0         |
| 37 | 3.5    | 4.5     | 4.5      | 3.5      | 4       | 4        | 3.5     | -1.5     | 0        | -0.5    | 0.5       | 0      | -0.5      |
| 38 | 4.5    | 4.5     | 4.5      | 4.5      | 4.5     | 5        | 4.5     | -0.5     | -0.5     | 0.5     | -0.5      | -1     | -0.5      |
| 39 | 3.5    | 3       | 4        | 5        | 5       | 4        | 3.5     | 0        | -1.5     | -0.5    | -2        | 0      | -2        |
| 40 | 3      | 3       | 4.5      | 5        | 4.5     | 2.5      | 5       | 0        | -1       | 0       | 0         | 1.5    | -1        |
| 41 | 3.5    | 3.5     | 4        | 4        | 4       | 3.5      | 4       | -0.5     | -2       | 0.5     | -1        | -0.5   | 0         |
| 42 | 4      | 3.5     | 3.5      | 5        | 5       | 5        | 5       | 0.5      | -2       | -1      | -2        | -1     | -1        |
| 43 | 5      | 5       | 5        | 5        | 4       | 4        | 5       | -1       | -2       | -1      | -1        | 0      | -1        |
| 44 | 2.5    | 3       | 3.5      | 4.5      | 3       | 1        | 4       | 0        | -1       | 0.5     | 0.5       | 2      | -0.5      |
| 45 | 3.5    | 4       | 5        | 5        | 4       | 4        | 4       | -3       | -3       | -2.5    | -1.5      | -3     | -4        |
| 46 | 4.5    | 4.5     | 4.5      | 4.5      | 4.5     | 4.5      | 4.5     | -1.5     | -1.5     | -1.5    | -1.5      | -0.5   | -0.5      |
| 47 | 3.5    | 2.5     | 2        | 3        | 4       | 2        | 2       | -0.5     | -2       | -0.5    | -2        | 1      | 0         |
| 48 | 3      | 3.5     | 3.5      | 2.5      | 2       | 3        | 3       | -0.5     | -2       | 1       | -4        | -2     | 2.5       |
| 49 | 4      | 2.5     | 5        | 4        | 4       | 3        | 3       | 0.5      | 0        | 0       | 0         | 1      | 0         |
| 50 | 3.5    | 5       | 2.5      | 4        | 3.5     | 3.5      | 4       | -2       | -2       | 0.5     | 0         | 0.5    | 0         |
| 51 | 4      | 4       | 2.5      | 3        | 4.5     | 3        | 1.5     | -1       | -2       | -1      | -1.5      | 0      | 1         |
| 52 | 5      | 4       | 4.5      | 3.5      | 3.5     | 4        | 5       | -1       | -2       | -3      | -2        | -1     | -0.5      |
| 53 | 4      | 4.5     | 3.5      | 4        | 3       | 3        | 3       | -1.5     | -2       | 0       | -1.5      | -1     | 0         |
| 54 | 3      | 2       | 5        | 5        | 4.5     | 3        | 3.5     | 1        | -0.5     | 1       | 0.5       | 1      | -1        |
| 55 | 4      | 4       | 5        | 5        | 5       | 4        | 4.5     | -1       | -2       | 0       | -1        | 1      | 0         |
| 56 | 3      | 3.5     | 5        | 5        | 4       | 4.5      | 3.5     | -0.5     | -0.5     | 0       | -0.5      | -0.5   | -1        |
| 57 | 4.5    | 2.5     | 3.5      | 3.5      | 4       | 4        | 4.5     | 0.5      | -1.5     | -1.5    | -1.5      | -1     | 0.5       |
| 58 | 2.5    | 4.5     | 5        | 5        | 3.5     | 3        | 4       | -1.5     | 0        | 1.5     | -1.5      | 2      | -1        |
| 59 | 1.5    | 2.5     | 2.5      | 2.5      | 1.5     | 1.5      | 1.5     | 0.5      | -0.5     | 1.5     | 1.5       | 1.5    | 0.5       |
| 60 | 3.5    | 3.5     | 3.5      | 3        | 2       | 3        | 2.5     | -0.5     | -3       | -1.5    | -1        | -1     | 1         |
| 61 | 3.5    | 4.5     | 3.5      | 3        | 2.5     | 1.5      | 3       | -1.5     | -2       | -0.5    | -2        | 2.5    | 1         |
| 62 | 5      | 5       | 4.5      | 5        | 4.5     | 4        | 4.5     | -2       | -2       | -2      | -1.5      | 0      | -2        |
| 63 | 4.5    | 5       | 4        | 5        | 4.5     | 4        | 4       | -2       | -1       | -1.5    | -2        | 0      | -1        |
| 64 | 2.5    | 1.5     | 4.5      | 4.5      | 4.5     | 2.5      | 2.5     | 2.5      | 0.5      | 2.5     | 0.5       | 1.5    | -0.5      |
| 65 | 1      | 1       | 2.5      | 3        | 3       | 2.5      | 2.5     | 2        | 2.5      | 2       | 2         | -0.5   | 0         |
| 66 | 5      | 4       | 4.5      | 5        | 5       | 5        | 5       | -1       | -1.5     | -1      | -0.5      | -1     | -1        |
| 67 | 4.5    | 5       | 5        | 4.5      | 5       | 5        | 4       | -1       | -1       | -0.5    | 0.5       | 0      | 0.5       |
| 68 | 3      | 4       | 5        | 5        | 5       | 3        | 4       | -2       | 1        | 0       | -0.5      | -1     | 0         |

| ID  | LEARN5 | CAREER5 | PEERRELAT | RESPECT5 | SECURE5 | PARTICI5 | HORNOR5 | CAREERfit | INCOMEfit | LEARNfit | BENEFITfit | PARTfit | RESPECTfit |
|-----|--------|---------|-----------|----------|---------|----------|---------|-----------|-----------|----------|------------|---------|------------|
| 69  | 4.5    | 4       | 4         | 4        | 5       | 4.5      | 4.5     | -2        | -2        | -0.5     | -3         | -1.5    | 1          |
| 70  | 4      | 3.5     | 0.5       | 5        | 3.5     | 4        | 3.5     | -1.5      | -0.5      | -2       | -1.5       | 0       | 0          |
| 71  | 3.5    | 5       | 5         | 4.5      | 4       | 4        | 3.5     | -2        | 0         | 0.5      | -0.5       | 0       | -0.5       |
| 72  | 4      | 4       | 3.5       | 4        | 2.5     | 3.5      | 4       | -1        | -2        | -1       | -0.5       | 0.5     | -1         |
| 73  | 2      | 3.5     | 4         | 4        | 3       | 3        | 2.5     | -2.5      | -1.5      | 0        | 0.5        | 0       | -1         |
| 74  | 2.5    | 3.5     | 4         | 4        | 3       | 2.5      | 2.5     | -0.5      | -1.5      | 0.5      | 1          | -0.5    | -1         |
| 75  | 2.5    | 4       | 4.5       | 4        | 3.5     | 2.5      | 2.5     | -1        | -1.5      | -0.5     | 1          | -0.5    | -1         |
| 76  | 2.5    | 3       | 3.5       | 3.5      | 4       | 3        | 2.5     | 0         | -1        | -0.5     | 0.5        | 0       | -0.5       |
| 77  | 3.5    | 3.5     | 5         | 5        | 4       | 3.5      | 5       | -0.5      | -2        | 0.5      | 1.5        | -1.5    | 0          |
| 78  | 3      | 3.5     | 4         | 4        | 3.5     | 2.5      | 2.5     | -0.5      | -1.5      | 0        | -0.5       | 1.5     | -1         |
| 79  | 4      | 4.5     | 3.5       | 4        | 3.5     | 3        | 3.5     | -1.5      | -2        | -1       | -1         | 0       | 1          |
| 80  | 0.5    | 3.5     | 5         | 2.5      | 2.5     | 2.5      | 3.5     | -0.5      | 2         | 1.5      | 2.5        | 0.5     | -0.5       |
| 81  | 4      | 5       | 5         | 5        | 3.5     | 2.5      | 4.5     | -2        | 0         | 1        | 2          | 2.5     | -1         |
| 82  | 3      | 4       | 4         | 4        | 4       | 3.5      | 4       | 0         | 0         | 1        | 1          | 1.5     | 0          |
| 83  | 4      | 5       | 4         | 4        | 5       | 3.5      | 3.5     | -3        | -2        | -1       | -2         | -1.5    | -1         |
| 84  | 4.5    | 2.5     | 4         | 4        | 4       | 4        | 2.5     | -0.5      | -1        | -1.5     | -1         | 0       | -1         |
| 85  | 4      | 5       | 5         | 5        | 3.5     | 4        | 1.5     | -1        | -1        | 1        | 0          | 1       | -2         |
| 86  | 4      | 4.5     | 5         | 4.5      | 5       | 4        | 4       | -0.5      | -1        | -1       | 0          | -1      | -1.5       |
| 87  | 3      | 2.5     | 4         | 4        | 2.5     | 2        | 3.5     | 0.5       | -1        | 0        | -2         | 1       | 0          |
| 88  | 5      | 2.5     | 2.5       | 2.5      | 2.5     | 2.5      | 2.5     | -0.5      | -1        | -2       | -2         | -0.5    | 1.5        |
| 89  | 2.5    | 2.5     | 4         | 4        | 4       | 4        | 2.5     | 0.5       | -0.5      | 0.5      | -0.5       | -2      | 0          |
| 90  | 4.5    | 3       | 4         | 4        | 4       | 4        | 4       | 0         | -1        | -1.5     | -1         | -3      | 0          |
| 91  | 4.5    | 4.5     | 4         | 4        | 3       | 3        | 4       | -2.5      | -3        | -1.5     | -1.5       | -1      | 0          |
| 92  | 5      | 5       | 3.5       | 5        | 4       | 4        | 4       | -3        | -1        | -1       | -2         | 0       | -1         |
| 93  | 4      | 5       | 2.5       | 2.5      | 2.5     | 3.5      | 3.5     | -2        | -2.5      | 0        | -0.5       | -1.5    | 0.5        |
| 94  | 4      | 4.5     | 1.5       | 2.5      | 1.5     | 1.5      | 2.5     | -1.5      | -4        | 0        | 1.5        | 1.5     | 0.5        |
| 95  | 3.5    | 3       | 5         | 5        | 5       | 4        | 3       | -1        | -1.5      | 0.5      | -0.5       | -2      | 0          |
| 96  | 2      | 2.5     | 5         | 5        | 5       | 4        | 4       | 0.5       | -0.5      | 2        | 2.5        | 0       | -1         |
| 97  | 4      | 2.5     | 5         | 3.5      | 4       | 4        | 4       | 0.5       | -2        | -1       | -2         | -1      | -0.5       |
| 98  | 5      | 4.5     | 4.5       | 4.5      | 5       | 5        | 5       | -1.5      | -3        | -2       | -2         | -3      | -1.5       |
| 99  | 4.5    | 4       | 2         | 3.5      | 3       | 2.5      | 1.5     | -1        | -2        | -0.5     | -1.5       | 1.5     | 0.5        |
| 100 | 4.5    | 4.5     | 4.5       | 4        | 4       | 4        | 3.5     | -3.5      | -3        | -1.5     | -2         | -3      | 0          |
| 101 | 5      | 5       | 5         | 5        | 2.5     | 4.5      | 5       | -2        | -2        | -1       | -3         | -2.5    | -2         |
| 102 | 5      | 5       | 4.5       | 4        | 3.5     | 3.5      | 4       | -2        | -1.5      | -3       | -2.5       | 0.5     | 0          |

| ID  | LEARN5 | CAREER5 | PEERRELAT | RESPECT5 | SECURE5 | PARTICI5 | HORNOR5 | CAREERfit | INCOMEfit | LEARNfit | BENEFITfit | PARTfit | RESPECTfit |
|-----|--------|---------|-----------|----------|---------|----------|---------|-----------|-----------|----------|------------|---------|------------|
| 103 | 3.5    | 4       | 5         | 5        | 3.5     | 3.5      | 4       | -2        | -3        | -0.5     | -2         | 0.5     | -1         |
| 104 | 3.5    | 3       | 5         | 4.5      | 4       | 4        | 4.5     | 0         | 0.5       | 0.5      | 0          | 0       | -0.5       |
| 105 | 2.5    | 3       | 3         | 3        | 3       | 3        | 3       | -1        | -1        | 0.5      | 0          | -1      | 1          |
| 106 | 5      | 5       | 4         | 4        | 4       | 4        | 4       | -1        | -2        | -1       | 0          | -1      | 0          |
| 107 | 4.5    | 4       | 4         | 3        | 3       | 3.5      | 2.5     | 0         | -1.5      | -0.5     | -0.5       | 0.5     | 0          |
| 108 | 4      | 3       | 4         | 3        | 2.5     | 2.5      | 3.5     | 0         | -1        | -1       | -1         | 0.5     | 0          |
| 109 | 3      | 5       | 4         | 4.5      | 3       | 4        | 4.5     | -2        | -1        | 0        | -2         | -1      | -0.5       |
| 110 | 4      | 4       | 5         | 3.5      | 3.5     | 4.5      | 3.5     | -2        | -4        | -1       | -4         | -0.5    | -0.5       |
| 111 | 4      | 3       | 4         | 3        | 4       | 3.5      | 3       | -1        | -1.5      | 1        | -1         | 0.5     | 1          |
| 112 | 2      | 4.5     | 5         | 4.5      | 3       | 5        | 5       | -0.5      | -1.5      | 2        | 2          | 0       | -0.5       |
| 113 | 4      | 3.5     | 3         | 4        | 4       | 4        | 3.5     | -1.5      | -3        | 1        | -1.5       | -1      | 1          |
| 114 | 4      | 4.5     | 3         | 1.5      | 2.5     | 1        | 2.5     | -0.5      | -2.5      | 0        | -2         | 3       | 2.5        |
| 115 | 5      | 5       | 5         | 5        | 5       | 4        | 5       | -3        | -3        | -2       | -2         | 0       | -1         |
| 116 | 4      | 3       | 2.5       | 4        | 3.5     | 1.5      | 1.5     | -1        | -3        | 0        | -1.5       | 0.5     | -1         |
| 117 | 3.5    | 4       | 4.5       | 4.5      | 3.5     | 4.5      | 3.5     | -1        | -2        | 1.5      | 0.5        | -1.5    | -0.5       |
| 118 | 2.5    | 2.5     | 4         | 5        | 4       | 4        | 5       | -1.5      | -1.5      | 0.5      | 1.5        | -2      | -2         |
| 119 | 4      | 2.5     | 2.5       | 4        | 3.5     | 1.5      | 1.5     | -0.5      | -3        | 0        | -1.5       | 0.5     | -1         |
| 120 | 4      | 4.5     | 4         | 3.5      | 2.5     | 1.5      | 2.5     | -2.5      | -3        | 0        | -1.5       | 2.5     | 0.5        |
| 121 | 3      | 3       | 5         | 4        | 5       | 5        | 5       | 0         | -1.5      | 0        | 1          | -2      | -1         |
| 122 | 3.5    | 4       | 3         | 3        | 3.5     | 3        | 3       | -2        | -3        | -0.5     | -1         | 0       | 0          |
| 123 | 4      | 4.5     | 4         | 3.5      | 3       | 2        | 3       | -2.5      | -2        | 0        | -1.5       | 2       | 0.5        |
| 124 | 1.5    | 3       | 2.5       | 1.5      | 2.5     | 2.5      | 2.5     | -1        | 1.5       | 1.5      | 1.5        | 2.5     | 2.5        |
| 125 | 4      | 4       | 2.5       | 3        | 3       | 3.5      | 5       | -1        | -1.5      | 0        | -0.5       | 0.5     | 1          |
| 126 | 3.5    | 5       | 3.5       | 3.5      | 3.5     | 1.5      | 1.5     | -2        | -0.5      | -0.5     | 0.5        | 2.5     | 0.5        |
| 127 | 4      | 4       | 5         | 5        | 2.5     | 3        | 3       | -1        | -1.5      | -1       | -2         | 1       | -2         |
| 128 | 4.5    | 2.5     | 4         | 4.5      | 2.5     | 4        | 4.5     | 1.5       | -1.5      | -0.5     | 0          | 0       | -0.5       |
| 129 | 4      | 2.5     | 2.5       | 1.5      | 1.5     | 2.5      | 3       | 0.5       | -0.5      | 1        | -1.5       | 1.5     | 2.5        |
| 130 | 3      | 3       | 3         | 2.5      | 3       | 2.5      | 2.5     | 2         | 0         | 1        | 1          | 2.5     | 2.5        |
| 131 | 4      | 4.5     | 4.5       | 4        | 4       | 4        | 4       | -1.5      | -3        | 0        | -1         | 0       | 0          |
| 132 | 4      | 4       | 3.5       | 4        | 5       | 3.5      | 5       | -2        | -2        | 0        | -3         | 0.5     | 0          |
| 133 | 3.5    | 4       | 4.5       | 4.5      | 5       | 3.5      | 5       | -2        | -2        | 0.5      | -3         | 0.5     | -0.5       |
| 134 | 3.5    | 4       | 4.5       | 4.5      | 4.5     | 3.5      | 5       | -2        | -1.5      | 0.5      | -3         | 0.5     | -0.5       |
| 135 | 3.5    | 4.5     | 4         | 4        | 5       | 2.5      | 3       | -2.5      | -2        | 0.5      | 0.5        | 2.5     | 0          |
| 136 | 4.5    | 4.5     | 4.5       | 4.5      | 4.5     | 4        | 4.5     | -2.5      | -3        | -1.5     | -1.5       | -1      | -0.5       |



| ID  | LEARN5 | CAREER5 | PEERRELAT | RESPECT5 | SECURE5 | PARTICI5 | HORNOR5 | CAREERfit | INCOMEfit | LEARNfit | BENEFITfit | PARTfit | RESPECTfit |
|-----|--------|---------|-----------|----------|---------|----------|---------|-----------|-----------|----------|------------|---------|------------|
| 137 | 3.5    | 4.5     | 3         | 3.5      | 3.5     | 1        | 1.5     | -1.5      | -2        | -0.5     | -0.5       | 3       | 0.5        |
| 138 | 5      | 5       | 4.5       | 4.5      | 5       | 5        | 4.5     | -3        | -2        | -3       | -3         | -3      | -1.5       |
| 139 | 3.5    | 5       | 3         | 1.5      | 1       | 0.5      | 0.5     | -2        | -3        | -0.5     | -1.5       | 3.5     | 2.5        |
| 140 | 3.5    | 5       | 3         | 3.5      | 4       | 2.5      | 2.5     | -4        | -2        | -0.5     | -3         | 1.5     | 0.5        |
| 141 | 0.5    | 1.5     | 4.5       | 3.5      | 4       | 2.5      | 2.5     | 0.5       | 2         | 1.5      | 1.5        | -1.5    | 0.5        |
| 142 | 1      | 1.5     | 4         | 4        | 2.5     | 2.5      | 3       | 1.5       | 2         | 2        | 2          | 0.5     | 0          |
| 143 | 5      | 5       | 5         | 5        | 5       | 4        | 5       | -1        | -3        | -3       | -1         | 0       | -1         |
| 144 | 3.5    | 4       | 5         | 5        | 5       | 3.5      | 4       | -3        | -2.5      | -0.5     | -2         | -1.5    | -1         |
| 145 | 5      | 5       | 5         | 5        | 5       | 5        | 3       | -2        | -2        | 0        | -1.5       | -1      | 0          |
| 146 | 5      | 3.5     | 5         | 4.5      | 5       | 5        | 3       | -0.5      | -2.5      | -2       | -1.5       | -1      | -1.5       |
| 147 | 4.5    | 4.5     | 3         | 4.5      | 3       | 2.5      | 1       | -3.5      | -3        | -1.5     | -2         | -0.5    | -0.5       |
| 148 | 4      | 5       | 5         | 5        | 5       | 5        | 4       | -1        | -2        | 0        | 1          | 0       | 0          |
| 149 | 2.5    | 2.5     | 5         | 3.5      | 5       | 2.5      | 4       | 0.5       | -1        | 0.5      | 0.5        | 1.5     | 1.5        |
| 150 | 4.5    | 4.5     | 3.5       | 3.5      | 3       | 2        | 2.5     | -0.5      | -1        | -0.5     | -0.5       | 2       | 1.5        |
| 151 | 3      | 3.5     | 5         | 4        | 4.5     | 4        | 3.5     | -0.5      | -2        | 1        | -1         | -2      | -1         |
| 152 | 3      | 3.5     | 5         | 4        | 4.5     | 4        | 3.5     | -0.5      | -2        | 0        | 0          | 0       | 1          |
| 153 | 5      | 2.5     | 5         | 5        | 2.5     | 2.5      | 2.5     | 0.5       | -1        | -1       | 1.5        | 2.5     | -1         |
| 154 | 4      | 4       | 5         | 4        | 4       | 4        | 4       | -1        | -2        | -1       | -1         | 0       | 0          |
| 155 | 1      | 2       | 4         | 4        | 4.5     | 3        | 4.5     | -1        | 0.5       | 1        | -1.5       | -1      | 0          |
| 156 | 5      | 4       | 2.5       | 5        | 2.5     | 2.5      | 2.5     | -1        | -1        | -2       | 0.5        | 1.5     | -2         |
| 157 | 3.5    | 3       | 4.5       | 3        | 2.5     | 3.5      | 2.5     | -2        | 0.5       | 0.5      | 1.5        | 0.5     | 1          |
| 158 | 5      | 5       | 5         | 4        | 4       | 4        | 5       | -1        | -1        | -1       | 0          | 0       | 0          |
| 159 | 4      | 4       | 4         | 2.5      | 1.5     | 1.5      | 1.5     | -1        | -1.5      | 0        | 0          | 3.5     | 2.5        |
| 160 | 5      | 4.5     | 2.5       | 2.5      | 0.5     | 2        | 1.5     | -0.5      | -1.5      | 0        | 0.5        | 2       | 2.5        |
| 161 | 4      | 4       | 4.5       | 4.5      | 4.5     | 4.5      | 4       | 0         | 0         | 0        | 0          | -0.5    | -0.5       |
| 162 | 4      | 4       | 4         | 4        | 3.5     | 3.5      | 3.5     | -1        | -1.5      | 0        | -1.5       | -1.5    | 0          |
| 163 | 1      | 2.5     | 1         | 2.5      | 1       | 0.5      | 0.5     | 1.5       | 1.5       | 3        | 3.5        | 3.5     | 1.5        |
| 164 | 1.5    | 2       | 4.5       | 4        | 4.5     | 4        | 4       | 0         | 0         | 0.5      | -1         | -2      | 0          |
| 165 | 3      | 2.5     | 2.5       | 2.5      | 2.5     | 1.5      | 1.5     | -1.5      | 0         | -1       | 1.5        | 0.5     | 0.5        |
| 166 | 2.5    | 3       | 2.5       | 2.5      | 1.5     | 2.5      | 2.5     | 0         | -1        | 0.5      | 2          | 0.5     | 1.5        |
| 167 | 3      | 4       | 5         | 4.5      | 4       | 4        | 3       | -2        | -2.5      | 0        | 0.5        | -3      | -0.5       |
| 168 | 4      | 3.5     | 4         | 5        | 3.5     | 3.5      | 2.5     | -0.5      | -0.5      | -1       | -0.5       | 0.5     | -1         |
| 169 | 3.5    | 4       | 2.5       | 4        | 3       | 3        | 3       | -1        | -1        | -0.5     | 0          | 1       | -1         |
| 170 | 3      | 4       | 4         | 3.5      | 3.5     | 3        | 2.5     | -1        | -1.5      | 0        | 0.5        | 1       | -0.5       |

| ID  | LEARN5 | CAREER5 | PEERRELAT | RESPECT5 | SECURE5 | PARTICI5 | HORNOR5 | CAREERfit | INCOMEfit | LEARNfit | BENEFITfit | PARTfit | RESPECTfit |
|-----|--------|---------|-----------|----------|---------|----------|---------|-----------|-----------|----------|------------|---------|------------|
| 171 | 4      | 3.5     | 4.5       | 4        | 4       | 2        | 3.5     | -0.5      | -2        | 0        | -1         | 2       | 0          |
| 172 | 2.5    | 1.5     | 4.5       | 4        | 3.5     | 3.5      | 4       | 1.5       | 0         | 0.5      | -2         | -2.5    | 0          |
| 173 | 4.5    | 4       | 3.5       | 3.5      | 1.5     | 2.5      | 1.5     | 0         | 2.5       | -0.5     | 0.5        | 2.5     | 0.5        |
| 174 | 4.5    | 5       | 2.5       | 3.5      | 3       | 2.5      | 3       | -2        | -1.5      | -0.5     | -2         | 0.5     | 0.5        |
| 175 | 5      | 5       | 3.5       | 3.5      | 1.5     | 3.5      | 4       | -2        | 0         | 0        | 0          | 0.5     | 0.5        |
| 176 | 4.5    | 4       | 3         | 2.5      | 3       | 2.5      | 1.5     | -3        | -1.5      | -1.5     | -3.5       | -1.5    | -1.5       |
| 177 | 5      | 4       | 2         | 3        | 1       | 3.5      | 2.5     | -2        | -3.5      | -3       | -1.5       | -1.5    | 0          |
| 178 | 2.5    | 2.5     | 4         | 4.5      | 4       | 2        | 2       | -0.5      | 0         | 0.5      | 1.5        | 0       | -0.5       |
| 179 | 2.5    | 2.5     | 4.5       | 4.5      | 4       | 4.5      | 3       | -0.5      | 0.5       | 0.5      | 0.5        | -2.5    | -0.5       |
| 180 | 3.5    | 4.5     | 4         | 3.5      | 2.5     | 2.5      | 3       | -0.5      | -1        | -0.5     | -2         | 0.5     | 0.5        |
| 181 | 5      | 4       | 4.5       | 5        | 4.5     | 4        | 4.5     | -1        | -1        | 0        | -0.5       | 0       | -1         |
| 182 | 4      | 3.5     | 3.5       | 3.5      | 4       | 3.5      | 3.5     | -1.5      | -1        | 0        | -1.5       | 0.5     | 0.5        |
| 183 | 3.5    | 2.5     | 5         | 5        | 5       | 5        | 4       | 1.5       | 1.5       | 0.5      | 0          | -4      | -1         |
| 184 | 3.5    | 4       | 5         | 5        | 4       | 3.5      | 3.5     | -1        | -0.5      | -0.5     | -0.5       | -1.5    | -1         |
| 185 | 3.5    | 4       | 3.5       | 5        | 4.5     | 4        | 3.5     | -1        | -2        | -0.5     | -2         | -2      | -2         |
| 186 | 4.5    | 4.5     | 4         | 3.5      | 4.5     | 4.5      | 4.5     | -1.5      | -1.5      | -1.5     | -1.5       | -0.5    | -0.5       |
| 187 | 0.5    | 1       | 4         | 5        | 4       | 1.5      | 2.5     | 0         | 2         | 1.5      | 0.5        | 0.5     | 0          |
| 188 | 4      | 4.5     | 4         | 4        | 3       | 3.5      | 4       | -1.5      | -1.5      | -1       | -1         | -0.5    | 0          |
| 189 | 2.5    | 2       | 4         | 1        | 2       | 3        | 3.5     | 1         | 1         | 0.5      | 0          | 0       | 2          |
| 190 | 2      | 3.5     | 5         | 4        | 5       | 2.5      | 3.5     | -2.5      | -1        | 0        | 1          | 1.5     | 0          |
| 191 | 4      | 3       | 5         | 5        | 5       | 4.5      | 5       | -2        | -2.5      | 0        | -2.5       | -2.5    | -2         |
| 192 | 2      | 2       | 5         | 3.5      | 4       | 3.5      | 5       | 0         | -0.5      | 1        | 0.5        | -0.5    | 0.5        |
| 193 | 2.5    | 4       | 2.5       | 4        | 4       | 4        | 4       | 0         | -1.5      | 1.5      | -1         | 0       | 0          |
| 194 | 5      | 4.5     | 4.5       | 4.5      | 2.5     | 2.5      | 3.5     | -2.5      | -3        | -4       | -1         | -0.5    | -0.5       |
| 195 | 3      | 4.5     | 4.5       | 2.5      | 2       | 2.5      | 2.5     | -3.5      | -4        | -1       | -4         | -1.5    | 1.5        |
| 196 | 4      | 2.5     | 4         | 3.5      | 4.5     | 2        | 1       | -0.5      | -1        | -1       | -1.5       | 0       | 0.5        |
| 197 | 3.5    | 3       | 5         | 4        | 5       | 5        | 5       | -2        | -2        | 0.5      | 1.5        | -2      | 1          |
| 198 | 3.5    | 5       | 2.5       | 3.5      | 2       | 3.5      | 2.5     | -4        | -3        | -1.5     | -1.5       | -1.5    | -0.5       |
| 199 | 1      | 0.5     | 4         | 5        | 5       | 4        | 5       | 2.5       | 1         | 2        | 0          | -3      | -1         |
| 200 | 5      | 5       | 4         | 4.5      | 3.5     | 2        | 2.5     | -1        | -4        | -3       | -3         | 0       | 0.5        |
| 201 | 5      | 4.5     | 3.5       | 4        | 3.5     | 3.5      | 4       | -1.5      | -2.5      | -2       | -3         | -0.5    | 0          |
| 202 | 3.5    | 3       | 4.5       | 4        | 4.5     | 4.5      | 4       | 1         | 0         | 0.5      | 0          | 0.5     | 0          |
| 203 | 3.5    | 4       | 4.5       | 4.5      | 4.5     | 2.5      | 2.5     | -1        | -1        | -0.5     | 1          | 0.5     | -1.5       |
| 204 | 1      | 1       | 4.5       | 1        | 1.5     | 1        | 4       | 2         | 1         | 2        | 3          | 2       | 2          |

| ID  | LEARN5 | CAREER5 | PEERRELAT | RESPECT5 | SECURE5 | PARTICI5 | HORNOR5 | CAREERfit | INCOMEfit | LEARNfit | BENEFITfit | PARTfit | RESPECTfit |
|-----|--------|---------|-----------|----------|---------|----------|---------|-----------|-----------|----------|------------|---------|------------|
| 205 | 2.5    | 4       | 2.5       | 2.5      | 2.5     | 2.5      | 1       | 1         | 0.5       | 1.5      | 2          | 1.5     | 1.5        |
| 206 | 1      | 1.5     | 5         | 3.5      | 4.5     | 2.5      | 4       | 1.5       | 0.5       | 3        | 1.5        | 1.5     | 0.5        |
| 207 | 4.5    | 4.5     | 3.5       | 2.5      | 1.5     | 1.5      | 2.5     | -1.5      | -1.5      | -0.5     | -1         | 3.5     | 1.5        |
| 208 | 4      | 4.5     | 3.5       | 3        | 2.5     | 0.5      | 1.5     | -3.5      | -2        | -3       | -3.5       | 2.5     | 0          |
| 209 | 3      | 3.5     | 3         | 2.5      | 2       | 2        | 3.5     | -0.5      | -0.5      | 0        | -1         | 2       | 0.5        |
| 210 | 5      | 5       | 5         | 4        | 5       | 3.5      | 5       | -4        | -3.5      | -1       | -2         | 0.5     | 1          |
| 211 | 4.5    | 5       | 4         | 4        | 3       | 3        | 3       | -2        | -2        | 0.5      | -1         | 1       | 1          |
| 212 | 0.5    | 1       | 2.5       | 4        | 2.5     | 1        | 0.5     | 1         | 0.5       | 1.5      | 1.5        | 2       | 0          |
| 213 | 5      | 5       | 5         | 5        | 5       | 2.5      | 5       | -1        | 0.5       | -2       | 0          | 1.5     | 0          |
| 214 | 4      | 4.5     | 5         | 5        | 4       | 2.5      | 5       | -1.5      | 2         | -1       | 1.5        | 1.5     | -1         |
| 215 | 5      | 4       | 2.5       | 4        | 4       | 4        | 4       | -1        | -1        | -1       | 0          | 0       | 0          |
| 216 | 3.5    | 3       | 2         | 3.5      | 1.5     | 2        | 1.5     | 0         | -0.5      | -0.5     | 3          | 2       | 0.5        |
| 217 | 2.5    | 1       | 4.5       | 4.5      | 4       | 4        | 4       | 2         | -0.5      | 0.5      | 1.5        | -1      | -0.5       |
| 218 | 4      | 4.5     | 2         | 1.5      | 0.5     | 0.5      | 3.5     | -1.5      | -1        | -1       | 0          | 3.5     | 1.5        |
| 219 | 4      | 5       | 5         | 5        | 4       | 3.5      | 2.5     | -4        | -2        | -2       | -3         | -2.5    | 0          |
| 220 | 3.5    | 5       | 4.5       | 3        | 4       | 3        | 4       | -2        | -3        | -0.5     | 1.5        | 1       | 1          |
| 221 | 4.5    | 3.5     | 4         | 5        | 3.5     | 4        | 4       | -0.5      | -2        | -1.5     | -1.5       | -1      | -2         |
| 222 | 5      | 5       | 5         | 2.5      | 4       | 2.5      | 2.5     | -2        | -3        | -3       | -3         | 0.5     | 1.5        |
| 223 | 4      | 2.5     | 5         | 4        | 2.5     | 1.5      | 4       | -1.5      | -1        | -2       | -3.5       | -0.5    | 0          |
| 224 | 4      | 2.5     | 5         | 4        | 3.5     | 1.5      | 4       | -1.5      | -1        | -1       | -3         | -0.5    | 0          |
| 225 | 4      | 5       | 4.5       | 4.5      | 3.5     | 4        | 4       | -2        | -4        | 0        | -2         | 0       | -1.5       |
| 226 | 5      | 5       | 5         | 5        | 5       | 5        | 5       | -3        | -4        | -3       | -3         | -2      | -2         |
| 227 | 1.5    | 0.5     | 4         | 3        | 2.5     | 2.5      | 2       | 0.5       | 3.5       | 1.5      | 1.5        | 0.5     | 0          |
| 228 | 3.5    | 4.5     | 2.5       | 2.5      | 0.5     | 1        | 0.5     | -3.5      | -3        | -0.5     | -3         | 1       | 1.5        |
| 229 | 4.5    | 4.5     | 4         | 4        | 3.5     | 3        | 3       | -2.5      | -2.5      | -0.5     | -1.5       | -1      | 0          |
| 230 | 4.5    | 4.5     | 4.5       | 4        | 3.5     | 4.5      | 4       | -1.5      | -2        | -1.5     | -1         | -0.5    | -1         |
| 231 | 4.5    | 5       | 4         | 3.5      | 3.5     | 2.5      | 3       | -2        | -3        | -3.5     | -1         | 1.5     | 0.5        |
| 232 | 4.5    | 5       | 4         | 1.5      | 4       | 2.5      | 0.5     | -2        | -2        | -0.5     | -1.5       | 1.5     | 2.5        |
| 233 | 2.5    | 5       | 2.5       | 2.5      | 1.5     | 2        | 0.5     | -3        | -2.5      | -0.5     | -0.5       | 2       | 1.5        |
| 234 | 3      | 2.5     | 1         | 3        | 1.5     | 3        | 2       | 0.5       | -2.5      | 0        | -3         | -1      | 1          |
| 235 | 5      | 2.5     | 4.5       | 4        | 5       | 4        | 5       | -1.5      | -4        | 0        | -2         | -2      | 0          |
| 236 | 3      | 4       | 5         | 4.5      | 4       | 3        | 3       | 0         | -0.5      | 2        | 4          | 2       | -0.5       |
| 237 | 4.5    | 4.5     | 4         | 3.5      | 5       | 2        | 5       | -3.5      | -4        | -1.5     | -3         | 0       | 0.5        |
| 238 | 4.5    | 4.5     | 4.5       | 4.5      | 4.5     | 4.5      | 4.5     | -0.5      | -1.5      | -0.5     | -0.5       | 0.5     | -0.5       |

| ID  | LEARN5 | CAREER5 | PEERRELAT | RESPECT5 | SECURE5 | PARTICI5 | HORNOR5 | CAREERfit | INCOMEfit | LEARNfit | BENEFITfit | PARTfit | RESPECTfit |
|-----|--------|---------|-----------|----------|---------|----------|---------|-----------|-----------|----------|------------|---------|------------|
| 239 | 2.5    | 3       | 4         | 4        | 2.5     | 2        | 2.5     | 0         | -1        | 0.5      | -1.5       | 2       | 0          |
| 240 | 4      | 3       | 4         | 4.5      | 5       | 5        | 4       | -2        | -2        | -1       | -1.5       | -4      | -1.5       |
| 241 | 1.5    | 2.5     | 3.5       | 3.5      | 3.5     | 1.5      | 2       | -1.5      | 2.5       | 0.5      | 1.5        | -0.5    | 0.5        |
| 242 | 5      | 2.5     | 2.5       | 3.5      | 2       | 2.5      | 2       | -1.5      | -0.5      | -3       | 0.5        | -0.5    | 0.5        |
| 243 | 4      | 4.5     | 3         | 2.5      | 2.5     | 2        | 2.5     | -3.5      | -4        | -1       | -3         | 0       | 1.5        |
| 244 | 4      | 5       | 5         | 4        | 4       | 4        | 2.5     | -4        | -2        | -1       | -3         | -2      | -1         |
| 245 | 4.5    | 5       | 5         | 5        | 5       | 4        | 5       | -2        | -2        | -1.5     | -2         | -2      | -1         |
| 246 | 4.5    | 5       | 4         | 4        | 4       | 4        | 4.5     | -3        | -1        | -1.5     | -2         | -1      | -1         |
| 247 | 4      | 4.5     | 4         | 5        | 4       | 3        | 2.5     | -2.5      | -2        | -1       | -2         | 0       | -1         |
| 248 | 4      | 4.5     | 4         | 3.5      | 3.5     | 3        | 4.5     | -2.5      | -3        | -1       | -3         | 1       | -0.5       |
| 249 | 3      | 3       | 3.5       | 3.5      | 3       | 3        | 3       | 0         | 0         | 1        | 0          | 1       | 0.5        |
| 250 | 4      | 4       | 2.5       | 3        | 4       | 4        | 4       | -1        | -1        | -1       | -1         | 0       | 0          |
| 251 | 3      | 3       | 4.5       | 5        | 4.5     | 2.5      | 5       | -2        | -1        | 1        | -1         | -0.5    | 0          |
| 252 | 4      | 2.5     | 4         | 4        | 4       | 4        | 4       | -1.5      | -1        | 0        | -1         | -2      | 1          |
| 253 | 2.5    | 2.5     | 4.5       | 4.5      | 3.5     | 4        | 4       | 0.5       | 1.5       | 1.5      | -2.5       | 0       | -0.5       |
| 254 | 3.5    | 3       | 4.5       | 4        | 4.5     | 4        | 5       | 0         | 0         | -0.5     | -0.5       | 0       | 0          |
| 255 | 4      | 4.5     | 3         | 4        | 3       | 2.5      | 2.5     | -1.5      | -1.5      | -1       | -1         | -0.5    | 0          |
| 256 | 5      | 4.5     | 3         | 2.5      | 1       | 1.5      | 3.5     | -0.5      | -2        | -1       | -2         | 2.5     | 0.5        |
| 257 | 5      | 5       | 3.5       | 4        | 2       | 3.5      | 3       | -2        | -1        | -2       | -1         | -0.5    | 0          |
| 258 | 3.5    | 2.5     | 0.5       | 0.5      | 1       | 0.5      | 0.5     | 1.5       | -2        | 0.5      | 0          | 3.5     | 2.5        |
| 259 | 4.5    | 4       | 3.5       | 4        | 1.5     | 3        | 2.5     | 0         | -1.5      | -0.5     | 1          | 1       | 1          |
| 260 | 4      | 5       | 4         | 1.5      | 1       | 2.5      | 3       | -1        | -1.5      | 0        | 0          | 1.5     | 0.5        |
| 261 | 5      | 4.5     | 4.5       | 4.5      | 5       | 5        | 5       | -1.5      | -3        | -2       | -2         | -1      | -1.5       |
| 262 | 3      | 4       | 3         | 4        | 4       | 4        | 4       | -1        | -1        | 0        | -1         | -1      | -2         |
| 263 | 3.5    | 4.5     | 2.5       | 2.5      | 1.5     | 2.5      | 2       | -1.5      | -3        | 0.5      | -0.5       | 1.5     | 1.5        |
| 264 | 3.5    | 4       | 4         | 4.5      | 1.5     | 1.5      | 0.5     | 0         | -3        | 0.5      | 0          | 2.5     | 0.5        |
| 265 | 2.5    | 4       | 1.5       | 2.5      | 3.5     | 3.5      | 2.5     | -1        | -2        | 0.5      | -1.5       | -1.5    | -0.5       |
| 266 | 4.5    | 4       | 4         | 3        | 4       | 4        | 4       | 0         | -1.5      | -0.5     | -1         | 0       | 1          |
| 267 | 4      | 5       | 5         | 5        | 4       | 4        | 5       | -2        | -4        | -1       | -2         | -2      | -1         |
| 268 | 4      | 5       | 3         | 4        | 4       | 2        | 1.5     | -2        | -2        | -1       | -0.5       | 1       | -1         |
| 269 | 4      | 5       | 5         | 4.5      | 5       | 5        | 4       | -3        | -4        | 0        | -2         | -3      | -0.5       |
| 270 | 2      | 2.5     | 5         | 4        | 5       | 2.5      | 4       | -0.5      | -2.5      | 2        | -1         | -0.5    | 0          |
| 271 | 4      | 3.5     | 3         | 4        | 4.5     | 4        | 5       | -0.5      | -2        | -1       | -1         | -2      | 0          |
| 272 | 2.5    | 3       | 4         | 3        | 3.5     | 3.5      | 2.5     | 0         | -0.5      | 0.5      | 0.5        | -0.5    | 1          |

| ID  | LEARN5 | CAREER5 | PEERRELAT | RESPECT5 | SECURE5 | PARTICI5 | HORNOR5 | CAREERfit | INCOMEfit | LEARNfit | BENEFITfit | PARTfit | RESPECTfit |
|-----|--------|---------|-----------|----------|---------|----------|---------|-----------|-----------|----------|------------|---------|------------|
| 273 | 5      | 3       | 5         | 4        | 5       | 4        | 2.5     | 0         | -1        | -1       | -1         | 0       | 0          |
| 274 | 4      | 5       | 3         | 3.5      | 3       | 2        | 3.5     | -1        | -1.5      | 0        | -1         | 3       | 0.5        |
| 275 | 5      | 4.5     | 4.5       | 4.5      | 5       | 4.5      | 4.5     | -1.5      | -2.5      | -2       | -2         | -0.5    | -0.5       |
| 276 | 4      | 2.5     | 4         | 4        | 4       | 4        | 4       | 0.5       | 0.5       | 0        | 0          | 0       | 0          |
| 277 | 3.5    | 2.5     | 2.5       | 2.5      | 2.5     | 5        | 3       | 0.5       | -3        | 0.5      | -2         | -3      | 0.5        |
| 278 | 4      | 2.5     | 2.5       | 2.5      | 2.5     | 5        | 3.5     | 0.5       | -3        | -1       | -2         | -3      | 1.5        |
| 279 | 4.5    | 5       | 4         | 4.5      | 4.5     | 4.5      | 4.5     | -3        | -2.5      | -1.5     | -1.5       | -1.5    | -0.5       |
| 280 | 4      | 4       | 4         | 3        | 4       | 4        | 4       | 0         | -1.5      | 0        | 0          | 0       | 0          |
| 281 | 3.5    | 4.5     | 3.5       | 2.5      | 2       | 0.5      | 0.5     | -0.5      | -3        | 0.5      | 0.5        | 3.5     | 2.5        |
| 282 | 3.5    | 4       | 4         | 4.5      | 4       | 3        | 3.5     | -3        | -2        | -0.5     | -3         | -1      | -0.5       |
| 283 | 4      | 4       | 4         | 4        | 4       | 4        | 5       | -1        | -3        | -1       | 0          | 0       | -1         |
| 284 | 3      | 4       | 4.5       | 2.5      | 4.5     | 0.5      | 2       | -3        | -1        | 0        | -2         | 1.5     | 0.5        |
| 285 | 3      | 4       | 4.5       | 4        | 4       | 3.5      | 3.5     | -2        | 0         | 0        | 0          | 0.5     | 0          |
| 286 | 3      | 4       | 4         | 4.5      | 5       | 3        | 3.5     | 1         | -1        | 2        | 0          | 2       | 0.5        |
| 287 | 2.5    | 2.5     | 5         | 3.5      | 4.5     | 4        | 3       | 0.5       | 0         | 0.5      | 0          | 0       | -0.5       |
| 288 | 2      | 4       | 5         | 4.5      | 5       | 1.5      | 3.5     | 1         | -1        | 3        | 0          | 3.5     | 0.5        |
| 289 | 3.5    | 4       | 4         | 3        | 3.5     | 3.5      | 2.5     | -1        | 1.5       | -0.5     | 0.5        | -1.5    | -1         |
| 290 | 4      | 4       | 4         | 4        | 3.5     | 4        | 4       | -1        | 0.5       | 0        | 0          | 1       | -1         |
| 291 | 4      | 3.5     | 4         | 3        | 3.5     | 4        | 4       | -1.5      | -2        | -2       | -0.5       | -1      | -1         |
| 292 | 3      | 3       | 5         | 3.5      | 4.5     | 4        | 3.5     | 0         | -1        | 0        | -1         | 0       | 0.5        |
| 293 | 2.5    | 3       | 4         | 4        | 5       | 3.5      | 4.5     | -1        | -0.5      | 1.5      | 2          | 1.5     | 0          |
| 294 | 2.5    | 3.5     | 4         | 3.5      | 4       | 3.5      | 3       | -0.5      | -1        | 0.5      | -0.5       | 0.5     | 0.5        |
| 295 | 3      | 3       | 4.5       | 5        | 4.5     | 2.5      | 5       | -2        | -1        | 0        | 0          | 0.5     | -2         |
| 296 | 2      | 2.5     | 4         | 5        | 5       | 5        | 5       | 1.5       | -0.5      | 2        | 1.5        | 0       | -2         |
| 297 | 3      | 2       | 5         | 4        | 4.5     | 4        | 5       | 1         | -2        | 0        | 1          | -1      | 0          |
| 298 | 3      | 4       | 3         | 4        | 4       | 4        | 4       | -1        | -1        | 0        | -1         | -1      | -2         |
| 299 | 4      | 4.5     | 3.5       | 3        | 4       | 4        | 4       | -1.5      | -3        | -1       | -2         | 0       | 1          |
| 300 | 3.5    | 2.5     | 2.5       | 2.5      | 2.5     | 1.5      | 2.5     | -0.5      | -0.5      | -0.5     | -0.5       | 0.5     | 0.5        |
| 301 | 5      | 5       | 3.5       | 4        | 3       | 1.5      | 4       | -1        | -3        | -1       | 1          | 3.5     | 0          |
| 302 | 4.5    | 4       | 4         | 4        | 4.5     | 4.5      | 4.5     | -1        | -2.5      | -0.5     | -1.5       | -0.5    | -1         |
| 303 | 4.5    | 4.5     | 4.5       | 4.5      | 4.5     | 4.5      | 4.5     | -0.5      | -2.5      | -0.5     | -0.5       | -0.5    | -0.5       |
| 304 | 3      | 5       | 3         | 4.5      | 4       | 2        | 3       | -2        | -3        | 0        | -2         | 2       | -1.5       |
| 305 | 5      | 4       | 4         | 4        | 3.5     | 3.5      | 3       | 0         | -3        | -1       | -1         | 1.5     | 0          |
| 306 | 4.5    | 4.5     | 4.5       | 4.5      | 4.5     | 4.5      | 4.5     | -1.5      | -2.5      | -1.5     | -1.5       | -1.5    | -0.5       |

| ID  | LEARN5 | CAREER5 | PEERRELAT | RESPECT5 | SECURE5 | PARTICI5 | HORNOR5 | CAREERfit | INCOMEfit | LEARNfit | BENEFITfit | PARTfit | RESPECTfit |
|-----|--------|---------|-----------|----------|---------|----------|---------|-----------|-----------|----------|------------|---------|------------|
| 307 | 4      | 4       | 4         | 4        | 4       | 3        | 4       | 1         | -3        | 0        | 0          | 1       | 1          |
| 308 | 2.5    | 2.5     | 4.5       | 4        | 3.5     | 3        | 3       | -0.5      | -0.5      | 0.5      | 1.5        | 1       | 0          |
| 309 | 4.5    | 4.5     | 4.5       | 4.5      | 4.5     | 4.5      | 4.5     | -1.5      | -1.5      | -1.5     | 1          | -2.5    | -1.5       |
| 310 | 4.5    | 5       | 5         | 4        | 5       | 5        | 5       | -2        | -2        | 0.5      | -0.5       | -1      | -1         |
| 311 | 4.5    | 5       | 3.5       | 4.5      | 1.5     | 2.5      | 3       | -1        | -3        | -0.5     | -1         | 1.5     | -1.5       |
| 312 | 4      | 4.5     | 3         | 3        | 3       | 3        | 3.5     | -1.5      | -3        | -1       | -0.5       | 2       | 1          |
| 313 | 4.5    | 5       | 3         | 3.5      | 3.5     | 3        | 2.5     | -2        | -1.5      | -1.5     | -1         | 1       | 0.5        |
| 314 | 5      | 2.5     | 4         | 5        | 5       | 4        | 5       | 0.5       | -2        | -1       | -0.5       | -1      | -1         |
| 315 | 4      | 4       | 5         | 4        | 4.5     | 4        | 4       | -1        | -1        | -1       | -1         | 0       | 0          |
| 316 | 4      | 3       | 5         | 4        | 5       | 3        | 3       | -1        | -3        | -1       | -2         | 1       | -1         |
| 317 | 3.5    | 2.5     | 3         | 3.5      | 4       | 3.5      | 3.5     | 0.5       | -1        | -0.5     | -1         | 0.5     | 0.5        |
| 318 | 3.5    | 4       | 5         | 4        | 4       | 4        | 4       | -1        | -2        | -0.5     | -1         | -2      | 0          |
| 319 | 3.5    | 4       | 5         | 4        | 4       | 4        | 4       | -1        | -2        | -0.5     | 0          | -2      | 0          |
| 320 | 5      | 5       | 5         | 5        | 5       | 4.5      | 5       | -2        | -2        | -1       | -1         | -0.5    | -2         |
| 321 | 4      | 5       | 3.5       | 2.5      | 2       | 2.5      | 3.5     | -1        | -1        | -1       | 0.5        | 1.5     | 1.5        |
| 322 | 4.5    | 5       | 5         | 4        | 4       | 4        | 3.5     | -2        | -2        | -1.5     | -2         | -2      | -1         |
| 323 | 4      | 4       | 3         | 3        | 2.5     | 2.5      | 4       | -1        | -2        | 0        | 0          | 1.5     | 1          |
| 324 | 4      | 4.5     | 3.5       | 4        | 2.5     | 1.5      | 2       | -3.5      | -1        | -2       | -0.5       | 1.5     | -2         |
| 325 | 3.5    | 4       | 3         | 2.5      | 3.5     | 2        | 2.5     | -1        | -1        | -0.5     | -1         | 1       | 0.5        |
| 326 | 4      | 4       | 5         | 4        | 4       | 4        | 4       | -1        | -1        | 0        | 0          | 0       | 0          |
| 327 | 4      | 4       | 4         | 4        | 5       | 4        | 5       | 0         | -2        | 0        | -1         | 1       | 0          |
| 328 | 3.5    | 3.5     | 4         | 4        | 4       | 3.5      | 3.5     | -0.5      | -1.5      | 0.5      | -2         | -0.5    | 0          |
| 329 | 3.5    | 3       | 3.5       | 4.5      | 4       | 3.5      | 3.5     | 0         | 0.5       | -0.5     | 1          | 0.5     | -0.5       |
| 330 | 4      | 4       | 4.5       | 4.5      | 5       | 4        | 3       | -1        | -3        | -1       | -1         | -1      | -0.5       |
| 331 | 4.5    | 4.5     | 4         | 4        | 3       | 3.5      | 3       | -1.5      | -3        | -1.5     | -2.5       | 0.5     | -1         |
| 332 | 1.5    | 2.5     | 5         | 1.5      | 3.5     | 4        | 3.5     | 0.5       | 2         | 1.5      | 2          | 1       | 1.5        |
| 333 | 4.5    | 3       | 2.5       | 2.5      | 3       | 1        | 1.5     | 0         | -1.5      | -1.5     | -1.5       | 4       | 0.5        |
| 334 | 4      | 4       | 4         | 4        | 4       | 4        | 4       | 0         | 0         | 0        | 0          | 0       | 0          |
| 335 | 3      | 3.5     | 5         | 4.5      | 5       | 5        | 4       | -0.5      | -0.5      | 2        | 0.5        | 0       | 0.5        |
| 336 | 5      | 5       | 5         | 5        | 4       | 4        | 4       | -2        | -2        | -2       | -2         | -1      | -1         |
| 337 | 3      | 3       | 4.5       | 4.5      | 4.5     | 3.5      | 3       | 0         | 1.5       | 1        | 1.5        | 0.5     | -0.5       |
| 338 | 4.5    | 4.5     | 3         | 3.5      | 2.5     | 2.5      | 3       | -0.5      | -1        | -0.5     | 0          | 1.5     | 1.5        |
| 339 | 5      | 4       | 5         | 5        | 5       | 4        | 4       | -1        | -2        | -2       | -2         | 0       | -1         |
| 340 | 4      | 5       | 4         | 4.5      | 4       | 3.5      | 3       | -2        | -1.5      | 0        | -1         | -0.5    | -2.5       |

| ID  | LEARN5 | CAREER5 | PEERRELAT | RESPECT5 | SECURE5 | PARTICI5 | HORNOR5 | CAREERfit | INCOMEfit | LEARNfit | BENEFITfit | PARTfit | RESPECTfit |
|-----|--------|---------|-----------|----------|---------|----------|---------|-----------|-----------|----------|------------|---------|------------|
| 341 | 5      | 5       | 5         | 5        | 4       | 4.5      | 4.5     | -3        | -3        | -4       | -2         | -1.5    | -2         |
| 342 | 4      | 4       | 4         | 4        | 4       | 2.5      | 4       | -1        | -1        | 0        | 0          | 0.5     | 0          |
| 343 | 5      | 5       | 4.5       | 4.5      | 4.5     | 4.5      | 4.5     | -3        | -3        | -3       | -1         | -0.5    | -0.5       |
| 344 | 2.5    | 2.5     | 2.5       | 4        | 5       | 2.5      | 2.5     | 0.5       | 0.5       | 1.5      | 1.5        | 1.5     | 0          |
| 345 | 4.5    | 4.5     | 4         | 4        | 4.5     | 4.5      | 4       | -1.5      | -0.5      | -2.5     | -2.5       | -1.5    | 0          |
| 346 | 4      | 4       | 4         | 3        | 4       | 4        | 3       | -2        | 0         | -1       | -1         | -1      | 1          |
| 347 | 4.5    | 5       | 3.5       | 4.5      | 5       | 5        | 1.5     | -2        | -2        | -0.5     | -2         | -2      | -1.5       |
| 348 | 4.5    | 4       | 5         | 5        | 5       | 5        | 5       | 0         | -2        | -0.5     | 0          | -1      | 0          |
| 349 | 4.5    | 4       | 5         | 5        | 5       | 5        | 4.5     | 0         | -2        | -0.5     | -1         | -1      | 0          |
| 350 | 3      | 2.5     | 3.5       | 4        | 2.5     | 1        | 1       | 0.5       | -0.5      | 0        | 1.5        | 1       | -1         |
| 351 | 1      | 2.5     | 2.5       | 2        | 2.5     | 2        | 0.5     | -0.5      | 2         | 2        | 2          | 1       | 1          |
| 352 | 1      | 1       | 4         | 4.5      | 5       | 4        | 5       | 3         | 0.5       | 3        | 0          | -1      | -0.5       |
| 353 | 2      | 2.5     | 4.5       | 4        | 4.5     | 3.5      | 4.5     | -0.5      | -0.5      | 2        | -1         | -1.5    | 0          |
| 354 | 4.5    | 5       | 2.5       | 2.5      | 2       | 1        | 2.5     | -3        | -2        | -0.5     | 0          | 4       | 0.5        |
| 355 | 4      | 5       | 1.5       | 1        | 0.5     | 2.5      | 2       | -1        | -1        | 1        | -0.5       | 1.5     | 4          |
| 356 | 4      | 5       | 4         | 4        | 4.5     | 5        | 5       | -3        | -1        | -2       | -2         | -3      | -1         |
| 357 | 4.5    | 3.5     | 4         | 4        | 4       | 3.5      | 2.5     | -0.5      | 1.5       | -0.5     | 1          | -0.5    | 0          |
| 358 | 4      | 5       | 2.5       | 3        | 3.5     | 2.5      | 1.5     | -2        | -1.5      | -1       | -1         | -0.5    | 1          |
| 359 | 5      | 5       | 5         | 4        | 5       | 5        | 2.5     | -3        | -3        | -2       | -3         | -2      | 1          |
| 360 | 4.5    | 5       | 3.5       | 4        | 4.5     | 3.5      | 3       | -3        | -2.5      | -1.5     | -2         | -1.5    | 0          |
| 361 | 5      | 5       | 5         | 5        | 3.5     | 4        | 5       | -3        | -4        | -2       | -3         | -2      | -1         |
| 362 | 4      | 4       | 2.5       | 2.5      | 1.5     | 3        | 2       | -2        | 0         | -1       | -3         | -1      | 1.5        |
| 363 | 4      | 4.5     | 3.5       | 2.5      | 2       | 3.5      | 3.5     | -3.5      | -3        | -1       | -2         | -0.5    | 0.5        |
| 364 | 4      | 4.5     | 4.5       | 4        | 4.5     | 4        | 4       | -0.5      | -2        | 0        | -2         | 1       | 0          |
| 365 | 4      | 4       | 2.5       | 4        | 3.5     | 3        | 3.5     | -1        | -3        | -2       | -3         | 1       | 0          |
| 366 | 4      | 5       | 2         | 4        | 3       | 2.5      | 2.5     | -1        | -4        | 1        | -0.5       | 1.5     | 0          |
| 367 | 4.5    | 5       | 4         | 4        | 2       | 2.5      | 3.5     | -1        | -4        | -0.5     | 0          | 1.5     | 1          |
| 368 | 5      | 4       | 2.5       | 3.5      | 3       | 3.5      | 3       | 0         | -2        | -2       | -2         | -0.5    | 0.5        |
| 369 | 5      | 2.5     | 2         | 4        | 4       | 2        | 1.5     | 0.5       | 0.5       | -3       | -2         | 1       | 0          |
| 370 | 5      | 2.5     | 5         | 2.5      | 2.5     | 2.5      | 4       | 1.5       | 2.5       | -1       | 1.5        | 2.5     | 1.5        |
| 371 | 4      | 5       | 4         | 4        | 5       | 3.5      | 4       | -2        | -1        | 0        | -1         | 0.5     | 1          |
| 372 | 4      | 4       | 4.5       | 5        | 4.5     | 3        | 3.5     | 0         | -0.5      | 0        | 0          | 2       | -1         |
| 373 | 2.5    | 3       | 4         | 3.5      | 2.5     | 3        | 1.5     | 0         | 1         | 1.5      | 1.5        | 1       | 0.5        |
| 374 | 4      | 5       | 5         | 5        | 3.5     | 4.5      | 4       | -2        | -4        | 1        | -1         | -3.5    | 0          |

| ID  | LEARN5 | CAREER5 | PEERRELAT | RESPECT5 | SECURE5 | PARTICI5 | HORNOR5 | CAREERfit | INCOMEfit | LEARNfit | BENEFITfit | PARTfit | RESPECTfit |
|-----|--------|---------|-----------|----------|---------|----------|---------|-----------|-----------|----------|------------|---------|------------|
| 375 | 4      | 4       | 4         | 5        | 4       | 4        | 4       | 0         | -1        | 0        | 0          | 1       | -1         |
| 376 | 3.5    | 4       | 4.5       | 5        | 4.5     | 3        | 3.5     | 0         | -0.5      | 0.5      | 0          | 2       | -1         |
| 377 | 2.5    | 1.5     | 4         | 4        | 3.5     | 3        | 3       | 2.5       | -1.5      | 0.5      | 0          | 0       | 1          |
| 378 | 4.5    | 5       | 3.5       | 4        | 3.5     | 3        | 3       | -1        | -4        | -0.5     | -1         | 1       | 0          |
| 379 | 4      | 5       | 4         | 4        | 3.5     | 2.5      | 4       | -3        | -2        | -1       | -2         | -1.5    | 0          |
| 380 | 5      | 2.5     | 5         | 5        | 5       | 2.5      | 2.5     | 0.5       | -2        | -2       | -1         | 1.5     | 0          |
| 381 | 2      | 5       | 4         | 4        | 2.5     | 3.5      | 2.5     | -3        | -2        | 2        | 0          | 1.5     | 0          |
| 382 | 3.5    | 5       | 3         | 2.5      | 2.5     | 1.5      | 2.5     | -2        | -2        | -0.5     | -3         | 2.5     | 1.5        |
| 383 | 3.5    | 4.5     | 2.5       | 4        | 3       | 4        | 3       | -1.5      | -4        | -0.5     | -1.5       | 0       | -1         |
| 384 | 5      | 4.5     | 2.5       | 3.5      | 1.5     | 3        | 3       | -1.5      | -2.5      | 0        | -1         | 0       | 0.5        |
| 385 | 4      | 4.5     | 5         | 5        | 5       | 2.5      | 3.5     | -1.5      | 0.5       | -1       | 1          | -0.5    | 0          |
| 386 | 3.5    | 3       | 5         | 4.5      | 4.5     | 4.5      | 4       | 0         | -3        | 0.5      | -1         | -0.5    | 0.5        |
| 387 | 3.5    | 4.5     | 4         | 4        | 3       | 0.5      | 2.5     | -2.5      | -3        | -1.5     | -1         | 0.5     | 0          |
| 388 | 4      | 4.5     | 5         | 5        | 5       | 4.5      | 3       | -1.5      | 0.5       | 1        | 0          | -2.5    | 0          |
| 389 | 2.5    | 3       | 2         | 3        | 1.5     | 2.5      | 2.5     | 0         | -0.5      | 0.5      | 0.5        | 1.5     | 1          |
| 390 | 4.5    | 5       | 5         | 4.5      | 4.5     | 4.5      | 4.5     | -1        | -1.5      | 0.5      | -0.5       | -1.5    | -0.5       |
| 391 | 5      | 4.5     | 4         | 4.5      | 4.5     | 4        | 4       | -1.5      | -1        | -2       | -1.5       | 0       | -0.5       |
| 392 | 5      | 4       | 3         | 3.5      | 3       | 1        | 2.5     | -1        | -0.5      | -3       | 0          | 3       | 0.5        |
| 393 | 3      | 3.5     | 4.5       | 4        | 5       | 3.5      | 5       | 0.5       | -0.5      | 0        | -0.5       | -0.5    | 0          |
| 394 | 1.5    | 1       | 3         | 5        | 2.5     | 2.5      | 2.5     | 2         | 3.5       | 1.5      | 0          | 0.5     | -1         |
| 395 | 2.5    | 3       | 4         | 2.5      | 2       | 2        | 3       | 1         | 0.5       | 1.5      | 1          | 2       | 1.5        |
| 396 | 3      | 3       | 4         | 4        | 4       | 4        | 4       | 0         | -1        | 0        | -1         | -1      | -1         |
| 397 | 4.5    | 4       | 5         | 4        | 5       | 2        | 4.5     | -1        | 0.5       | -1.5     | -1         | 1       | -1         |
| 398 | 4      | 5       | 5         | 5        | 2.5     | 3        | 3.5     | -2        | -1.5      | -1       | -1.5       | 1       | -2         |
| 399 | 3      | 3       | 3.5       | 3.5      | 3       | 3.5      | 3.5     | 0         | -2        | 1        | -2         | -1.5    | -0.5       |
| 400 | 3.5    | 4       | 5         | 4.5      | 5       | 5        | 3       | -2        | -0.5      | -0.5     | -0.5       | -1      | -0.5       |
| 401 | 4      | 4       | 5         | 5        | 3.5     | 4        | 5       | -2        | -2        | -1       | -1         | -2      | 0          |
| 402 | 3.5    | 4       | 1         | 1.5      | 1       | 1.5      | 2.5     | 0         | -2        | 0.5      | -0.5       | 1.5     | 2.5        |
| 403 | 2.5    | 1       | 4         | 3        | 4.5     | 4        | 1.5     | 1         | 1.5       | 0.5      | 0.5        | 0       | 1          |
| 404 | 4      | 4.5     | 4         | 4        | 5       | 4        | 4       | -1.5      | -3        | -1       | -2         | 0       | -1         |
| 405 | 3      | 3.5     | 5         | 2.5      | 3.5     | 3.5      | 3.5     | -0.5      | 1         | 0        | 0.5        | -0.5    | 0.5        |
| 406 | 5      | 4.5     | 5         | 4.5      | 5       | 4.5      | 4.5     | -0.5      | -1        | -3       | -2         | -1.5    | -1.5       |
| 407 | 3.5    | 4       | 1.5       | 2.5      | 1.5     | 0.5      | 1.5     | -2        | -2        | 0.5      | -2.5       | 2.5     | -1.5       |
| 408 | 4      | 4.5     | 4.5       | 5        | 5       | 1        | 5       | -1.5      | 1         | -1       | 1          | 3       | -2         |



| ID  | LEARN5 | CAREER5 | PEERRELAT | RESPECT5 | SECURE5 | PARTICI5 | HORNOR5 | CAREERfit | INCOMEfit | LEARNfit | BENEFITfit | PARTfit | RESPECTfit |
|-----|--------|---------|-----------|----------|---------|----------|---------|-----------|-----------|----------|------------|---------|------------|
| 409 | 4.5    | 4.5     | 4.5       | 4.5      | 5       | 4.5      | 4.5     | -1.5      | -1        | -1.5     | -1.5       | -1.5    | -0.5       |
| 410 | 5      | 4       | 5         | 5        | 5       | 4        | 5       | -2        | -2        | -2       | -1         | -2      | 0          |
| 411 | 4.5    | 4.5     | 4.5       | 4.5      | 4.5     | 4.5      | 4       | -1.5      | -2.5      | -0.5     | -0.5       | -0.5    | -0.5       |
| 412 | 5      | 5       | 5         | 5        | 5       | 5        | 5       | -2        | -3        | -2       | -2         | -1      | -1         |
| 413 | 4      | 4       | 4         | 4        | 4       | 4        | 4       | -1        | 0.5       | 0        | 0.5        | 0       | 1          |
| 414 | 5      | 3       | 5         | 4.5      | 5       | 5        | 5       | 0         | -2        | -1       | -2         | -2      | -0.5       |
| 415 | 4      | 4.5     | 4.5       | 4.5      | 4       | 4        | 4       | -1.5      | -3        | 0        | -2         | 0       | -1.5       |
| 416 | 5      | 5       | 5         | 4.5      | 5       | 5        | 5       | -1        | 0.5       | -1       | -1         | -1      | -0.5       |
| 417 | 4      | 4       | 5         | 5        | 2       | 3        | 3       | 0         | -4        | -1       | -1         | 2       | -1         |
| 418 | 4.5    | 4.5     | 5         | 4.5      | 4.5     | 4.5      | 4.5     | -0.5      | -2.5      | -0.5     | -0.5       | -0.5    | -0.5       |
| 419 | 4      | 5       | 4         | 4.5      | 3.5     | 5        | 2.5     | 0         | -1.5      | 1        | 0.5        | 0       | 0.5        |
| 420 | 2.5    | 2.5     | 2.5       | 2.5      | 2.5     | 2.5      | 2.5     | 0.5       | 0.5       | 1.5      | 0.5        | 1.5     | 1.5        |
| 421 | 5      | 4.5     | 4.5       | 4.5      | 4       | 4        | 4       | -2.5      | -2        | -3       | -1.5       | 0       | -0.5       |
| 422 | 4      | 4       | 5         | 5        | 4.5     | 4        | 4       | -2        | -1.5      | 0        | -1         | 0       | -1         |
| 423 | 4      | 3.5     | 5         | 4.5      | 4.5     | 4        | 4       | -0.5      | -1        | -2       | 0          | 0       | 0.5        |
| 424 | 4      | 4       | 4         | 4        | 4       | 4        | 4       | -1        | -1        | -1       | 0          | -1      | -1         |
| 425 | 4      | 3.5     | 3.5       | 3.5      | 4       | 4        | 5       | -2.5      | -3        | -1       | -3         | -2      | 0.5        |
| 426 | 2.5    | 3       | 5         | 4        | 4.5     | 2.5      | 3.5     | 0         | 0         | 0.5      | 1.5        | 1.5     | 0          |
| 427 | 4.5    | 4.5     | 5         | 4        | 4.5     | 5        | 5       | -0.5      | -1        | -0.5     | -1         | 0       | 0          |
| 428 | 5      | 4       | 2.5       | 4        | 4       | 4        | 4       | 0         | -1        | -1       | 0          | 0       | 0          |
| 429 | 5      | 5       | 4         | 3        | 2.5     | 2.5      | 3.5     | 0         | -2        | -1       | -1         | 1.5     | 1          |
| 430 | 3.5    | 2.5     | 5         | 5        | 5       | 3.5      | 5       | 0.5       | -1        | -0.5     | -1         | 0.5     | -1         |
| 431 | 2.5    | 2.5     | 5         | 5        | 4       | 4        | 4       | 1.5       | -0.5      | 1.5      | 1          | 0       | -1         |
| 432 | 3.5    | 4       | 4.5       | 4.5      | 4.5     | 3.5      | 3.5     | -1        | -1.5      | -0.5     | -1         | -1.5    | -0.5       |
| 433 | 1.5    | 0.5     | 4         | 5        | 1.5     | 2.5      | 3.5     | 0.5       | 0.5       | 2.5      | 1.5        | 1.5     | -1         |
| 434 | 3.5    | 3.5     | 4         | 4        | 4       | 3.5      | 3       | -0.5      | 0         | 0.5      | 0.5        | 0.5     | 0          |
| 435 | 4.5    | 5       | 3         | 4        | 3       | 3.5      | 1.5     | -2        | -3        | 0.5      | -1         | 0.5     | 1          |
| 436 | 3.5    | 3.5     | 2.5       | 1        | 2       | 1        | 2.5     | 0.5       | -1        | 0.5      | -0.5       | 1       | 2          |
| 437 | 4      | 4.5     | 4.5       | 4        | 4       | 4        | 4       | -1.5      | -1.5      | 0        | -0.5       | -1      | 0          |
| 438 | 4      | 4       | 4         | 4        | 4       | 4        | 4       | 1         | -2        | 0        | -1         | 0       | 0          |
| 439 | 3.5    | 4.5     | 4.5       | 4.5      | 5       | 4        | 4       | -1.5      | -3        | 0.5      | -1         | 0       | 0.5        |
| 440 | 4      | 5       | 4.5       | 3.5      | 3.5     | 2.5      | 4       | -1        | -1        | 0        | 1.5        | 1.5     | 0.5        |
| 441 | 2      | 3       | 4         | 4        | 3.5     | 3        | 4       | -1        | 0.5       | 1        | -0.5       | -1      | 0          |
| 442 | 4.5    | 5       | 4.5       | 4.5      | 4       | 4        | 4.5     | -2        | -3.5      | -0.5     | -1.5       | 0       | -0.5       |

| ID  | LEARN5 | CAREER5 | PEERRELAT | RESPECT5 | SECURE5 | PARTICI5 | HORNOR5 | CAREERfit | INCOMEfit | LEARNfit | BENEFITfit | PARTfit | RESPECTfit |
|-----|--------|---------|-----------|----------|---------|----------|---------|-----------|-----------|----------|------------|---------|------------|
| 443 | 4      | 4       | 4         | 5        | 5       | 4        | 4       | -1        | -3        | 0        | -2         | -2      | -1         |
| 444 | 5      | 5       | 1.5       | 1.5      | 0.5     | 0.5      | 0.5     | -2        | 0         | -2       | 0          | 3.5     | 1.5        |
| 445 | 2.5    | 4       | 4         | 4        | 4       | 3.5      | 2.5     | -1        | 0.5       | 0.5      | 0.5        | -1.5    | 0          |
| 446 | 4      | 4       | 5         | 5        | 5       | 3.5      | 3.5     | -1        | 0         | -1       | -0.5       | 0.5     | -1         |
| 447 | 4      | 4.5     | 3.5       | 3        | 3       | 2        | 2.5     | -1.5      | -1        | -1       | -1.5       | 2       | 1          |
| 448 | 5      | 5       | 5         | 5        | 5       | 4        | 4       | -2        | -2        | -2       | -2         | 0       | -2         |
| 449 | 4      | 2.5     | 5         | 2.5      | 3.5     | 2.5      | 2.5     | -0.5      | -2        | -1       | -2.5       | -0.5    | 1.5        |
| 450 | 4      | 4       | 4         | 3.5      | 4.5     | 4        | 4.5     | -1        | -1        | -1       | -1.5       | 0       | -0.5       |
| 451 | 3      | 2       | 3.5       | 2        | 4       | 2.5      | 4       | -1        | -0.5      | 0        | 1          | 1.5     | 2          |
| 452 | 2.5    | 3.5     | 4         | 4        | 4       | 3.5      | 2.5     | -2.5      | -0.5      | -1.5     | -1.5       | -1.5    | -1         |
| 453 | 2.5    | 2.5     | 5         | 4.5      | 5       | 4        | 4.5     | 0.5       | 0         | 0.5      | 0.5        | 0       | -0.5       |
| 454 | 4      | 5       | 5         | 4        | 5       | 4        | 4       | -2        | -2        | -1       | -2         | 0       | 0          |
| 455 | 4      | 4       | 5         | 5        | 5       | 3        | 3.5     | -1        | -1        | 0        | 0.5        | 1       | -2         |
| 456 | 1.5    | 1       | 4         | 1        | 1.5     | 2.5      | 3       | 2         | 0.5       | 2.5      | 2          | 0.5     | 2          |
| 457 | 3      | 4       | 3         | 3.5      | 4       | 3.5      | 3       | 0         | -1        | 0        | 0          | 0.5     | 1.5        |
| 458 | 4      | 1.5     | 4         | 5        | 5       | 3.5      | 2.5     | 1.5       | -3        | -1       | 0.5        | 0.5     | -1         |
| 459 | 4      | 4.5     | 4.5       | 5        | 4       | 4        | 5       | -2.5      | -2        | 0        | -2         | 0       | -1         |
| 460 | 1      | 2.5     | 2.5       | 2.5      | 3       | 2.5      | 0.5     | 0.5       | 1         | 3        | 1.5        | 0.5     | 0.5        |
| 461 | 2.5    | 2.5     | 3         | 3        | 2.5     | 2.5      | 2       | 0.5       | -1        | 0.5      | 0.5        | 2.5     | 0          |
| 462 | 5      | 5       | 5         | 5        | 4       | 4        | 4       | -3        | -2        | -1       | -3         | -2      | 0          |
| 463 | 2.5    | 3       | 4         | 3.5      | 4       | 3        | 3.5     | 0         | 0.5       | 1.5      | 0.5        | -2      | 1.5        |
| 464 | 3.5    | 4.5     | 4.5       | 4.5      | 3.5     | 4        | 2.5     | -1.5      | -0.5      | 0.5      | 0.5        | -1      | 0.5        |
| 465 | 4.5    | 4       | 4         | 5        | 4.5     | 4.5      | 5       | -1        | -2        | -1.5     | -1.5       | -0.5    | 0          |
| 466 | 4.5    | 5       | 4         | 4.5      | 3       | 3        | 3       | -2        | -4        | -1.5     | -1         | 0       | -0.5       |
| 467 | 3      | 4       | 4         | 3        | 4       | 3.5      | 3.5     | 0         | -0.5      | 1        | -0.5       | 0.5     | 1          |
| 468 | 4      | 5       | 4         | 2.5      | 3.5     | 3        | 3       | -1        | -2        | 0        | -2         | 1       | 1.5        |
| 469 | 3      | 3       | 3         | 3        | 4       | 3        | 3       | 1         | 0         | 0        | 0          | 1       | 1          |
| 470 | 3.5    | 1.5     | 4.5       | 4.5      | 4       | 5        | 2.5     | 1.5       | -1        | -0.5     | -0.5       | -1      | -0.5       |
| 471 | 1.5    | 2.5     | 4         | 4.5      | 4       | 3.5      | 4.5     | 0.5       | -1.5      | 1.5      | 0.5        | -2.5    | -0.5       |
| 472 | 4.5    | 4       | 2         | 2.5      | 4       | 2.5      | 3       | -2        | -0.5      | -1.5     | -1         | 1.5     | 1.5        |
| 473 | 5      | 5       | 5         | 4        | 5       | 2.5      | 2.5     | -1        | -0.5      | -1       | -2         | 0.5     | 1          |
| 474 | 4.5    | 4.5     | 4.5       | 4.5      | 4.5     | 4        | 4       | -1.5      | -1.5      | -2.5     | 0.5        | 0       | -0.5       |
| 475 | 3.5    | 4.5     | 4         | 3.5      | 4.5     | 4.5      | 4       | -3.5      | -1.5      | -0.5     | -2         | -1.5    | 1.5        |
| 476 | 5      | 4       | 5         | 5        | 4       | 4        | 5       | -2        | -1        | -4       | -2         | -2      | -1         |

| ID  | LEARN5 | CAREER5 | PEERRELAT | RESPECT5 | SECURE5 | PARTICI5 | HORNOR5 | CAREERfit | INCOMEfit | LEARNfit | BENEFITfit | PARTfit | RESPECTfit |
|-----|--------|---------|-----------|----------|---------|----------|---------|-----------|-----------|----------|------------|---------|------------|
| 477 | 1.5    | 2.5     | 4.5       | 3.5      | 1.5     | 2.5      | 3.5     | 0.5       | 0.5       | 1.5      | -0.5       | 0.5     | 0.5        |
| 478 | 3.5    | 4.5     | 4         | 4        | 5       | 3.5      | 3       | -1.5      | -2        | 0.5      | -1         | 0.5     | 0          |
| 479 | 4.5    | 4       | 4         | 4.5      | 4       | 4        | 4.5     | -1        | -1.5      | -1.5     | -1.5       | -2      | -0.5       |
| 480 | 3.5    | 4.5     | 1         | 2        | 1       | 1.5      | 0.5     | -0.5      | -1.5      | 1.5      | -3         | 3.5     | 3          |
| 481 | 4      | 4       | 3         | 3        | 3       | 1        | 3.5     | -1        | -3        | -1       | 0          | 1       | 1          |
| 482 | 3      | 4.5     | 2.5       | 3        | 0.5     | 0.5      | 1       | -1.5      | -2.5      | 1        | -1         | 3.5     | 1          |
| 483 | 3.5    | 4.5     | 3.5       | 3        | 3       | 2.5      | 2       | -3.5      | -4        | -0.5     | -3         | 0.5     | 1          |
| 484 | 2.5    | 2.5     | 5         | 4.5      | 3       | 2.5      | 2.5     | 0.5       | 1.5       | 0.5      | 1.5        | 0.5     | -0.5       |
| 485 | 2.5    | 3       | 4.5       | 4        | 4.5     | 4.5      | 4       | -1        | -2        | 0.5      | -2.5       | -0.5    | 0          |
| 486 | 5      | 5       | 4.5       | 4.5      | 5       | 5        | 4.5     | -3        | -3        | -2       | -2         | -1      | -1.5       |
| 487 | 4      | 4       | 5         | 2.5      | 4.5     | 4        | 4       | -3        | -1.5      | -2       | -1         | -2      | 1.5        |
| 488 | 1      | 0.5     | 3.5       | 4        | 2.5     | 1        | 1       | 0.5       | 0.5       | 3        | 1.5        | 2       | 0          |
| 489 | 3.5    | 5       | 3         | 2.5      | 4       | 2.5      | 5       | -2        | -3        | -0.5     | -3         | 0.5     | 1.5        |
| 490 | 5      | 5       | 3         | 4        | 3       | 1.5      | 2.5     | -2        | -3        | -2       | -2         | 0.5     | 0          |
| 491 | 4.5    | 2.5     | 5         | 4        | 4.5     | 5        | 4.5     | 0.5       | -3        | -1.5     | -3         | -4      | 0          |
| 492 | 5      | 4       | 5         | 3        | 2       | 5        | 2.5     | -1        | -4        | -1       | -2         | -1      | 1          |
| 493 | 1.5    | 1.5     | 4         | 4        | 5       | 3.5      | 3.5     | -0.5      | -0.5      | 0.5      | 0          | 0.5     | 0          |
| 494 | 3.5    | 2.5     | 3         | 1.5      | 1       | 5        | 3       | 0.5       | 0         | 0.5      | 2          | -1      | 1.5        |
| 495 | 4      | 5       | 4         | 4        | 5       | 5        | 4       | -4        | -3        | -2       | -4         | -1      | -3         |
| 496 | 1.5    | 2.5     | 5         | 4        | 2       | 2.5      | 4       | 1.5       | 1         | 1.5      | 0          | 1.5     | 0          |
| 497 | 1.5    | 2.5     | 3         | 3        | 1.5     | 1.5      | 1.5     | 0.5       | 1.5       | 1.5      | 1.5        | 0.5     | 0          |
| 498 | 5      | 5       | 5         | 5        | 5       | 5        | 5       | -1        | -1        | -1       | 0.5        | -1      | -1         |
| 499 | 4      | 4       | 4         | 4        | 4       | 4        | 4       | 0         | -1.5      | -1       | -1         | 0       | 1          |
| 500 | 4      | 4       | 4         | 4        | 4       | 3.5      | 3       | 0         | -2        | 0        | 0          | -1.5    | 0          |
| 501 | 3      | 4       | 2.5       | 3.5      | 2.5     | 4.5      | 3.5     | -3        | -4        | 0        | -3         | -1.5    | 0.5        |
| 502 | 4.5    | 5       | 4         | 4        | 4       | 5        | 1.5     | -1        | -2        | -1.5     | -2         | -1      | 0          |
| 503 | 4      | 1       | 4         | 5        | 5       | 2        | 3.5     | 1         | -2        | -1       | -3.5       | 1       | 0          |
| 504 | 3.5    | 3.5     | 2.5       | 2        | 3.5     | 2.5      | 2       | -1.5      | -2        | -0.5     | -1.5       | 0.5     | 1          |
| 505 | 5      | 5       | 4         | 4        | 3       | 4        | 3.5     | -3        | -3.5      | -1       | -2         | 0       | 0          |
| 506 | 3.5    | 3.5     | 2.5       | 2.5      | 1.5     | 0.5      | 0.5     | -2.5      | -4        | -0.5     | -3         | 1.5     | 1.5        |
| 507 | 4.5    | 4.5     | 4         | 3        | 3.5     | 2.5      | 3       | -1.5      | -2        | -1.5     | -2         | 1.5     | 0          |
| 508 | 2      | 1       | 1         | 1.5      | 3.5     | 4.5      | 2.5     | 2         | 0.5       | 1        | 0.5        | -3.5    | 1.5        |
| 509 | 3      | 3.5     | 3.5       | 3.5      | 3.5     | 3        | 3.5     | -1.5      | -3        | 0        | -3         | -1      | 0.5        |
| 510 | 5      | 5       | 5         | 5        | 5       | 4.5      | 3.5     | -3        | -3        | -3       | -3         | -0.5    | -1         |

| ID  | LEARN5 | CAREER5 | PEERRELAT | RESPECT5 | SECURE5 | PARTICI5 | HORNOR5 | CAREERfit | INCOMEfit | LEARNfit | BENEFITfit | PARTfit | RESPECTfit |
|-----|--------|---------|-----------|----------|---------|----------|---------|-----------|-----------|----------|------------|---------|------------|
| 511 | 2.5    | 4       | 4         | 4        | 5       | 4.5      | 2.5     | -2        | -1.5      | -0.5     | 0.5        | -2.5    | 0          |
| 512 | 4      | 4.5     | 4.5       | 4        | 4       | 3.5      | 3       | -2.5      | -3        | 0        | -1         | 0.5     | -1         |
| 513 | 5      | 5       | 4         | 4        | 5       | 4        | 5       | -3        | -4        | -3       | -3         | -1      | -1         |
| 514 | 5      | 5       | 3         | 2.5      | 3       | 1.5      | 3.5     | -1        | -3        | -2       | -0.5       | 2.5     | 1.5        |
| 515 | 5      | 4.5     | 4.5       | 5        | 4.5     | 4.5      | 4.5     | -3.5      | -3        | -2       | -2         | -0.5    | 0          |
| 516 | 1      | 0.5     | 4         | 5        | 5       | 3.5      | 3.5     | 0.5       | -2.5      | 3        | -1         | 0.5     | -2         |
| 517 | 3.5    | 2.5     | 4         | 4        | 4.5     | 4        | 4       | 0.5       | 1         | 0.5      | 1          | 0       | 0          |
| 518 | 4      | 3       | 4.5       | 3.5      | 4.5     | 3        | 2.5     | -2        | -0.5      | -1       | 0          | 1       | 0.5        |
| 519 | 3.5    | 4       | 5         | 4.5      | 4       | 3        | 2.5     | -1        | 0.5       | -0.5     | -1         | 1       | -1.5       |
| 520 | 4      | 4       | 4.5       | 4        | 4       | 3.5      | 3.5     | -1        | -1        | 0        | -0.5       | 0.5     | 0          |
| 521 | 4      | 3       | 5         | 4.5      | 4       | 4        | 4.5     | -1        | 0.5       | -1       | 0          | -1      | -1.5       |
| 522 | 2.5    | 3.5     | 5         | 5        | 3       | 5        | 5       | -0.5      | -0.5      | 0.5      | 1          | 0       | -1         |
| 523 | 3      | 3       | 3         | 3        | 3       | 3        | 3       | 0         | 0         | 0        | 0          | -1      | 1          |
| 524 | 5      | 4       | 5         | 5        | 5       | 5        | 5       | 0         | -1        | 0        | 0          | -1      | -1         |
| 525 | 3.5    | 4.5     | 4         | 3        | 3.5     | 1.5      | 3.5     | -0.5      | -2        | 0.5      | -1         | 2.5     | 1          |
| 526 | 3.5    | 3.5     | 3.5       | 3.5      | 3.5     | 3.5      | 3.5     | -0.5      | -0.5      | 0.5      | 0.5        | 0.5     | -0.5       |
| 527 | 4      | 4       | 4         | 4        | 4       | 4        | 3       | -2        | -0.5      | -1       | -1         | -2      | -1         |
| 528 | 2.5    | 3.5     | 4.5       | 3        | 4       | 3.5      | 3       | -0.5      | -1        | 0.5      | 0          | 1.5     | 1          |
| 529 | 1.5    | 3       | 5         | 5        | 5       | 1        | 3.5     | 0         | 0.5       | 1.5      | 1.5        | 3       | -1         |
| 530 | 5      | 4.5     | 5         | 4        | 5       | 4.5      | 4       | -0.5      | -2        | -1       | -1         | -0.5    | 0          |
| 531 | 5      | 4       | 5         | 4        | 5       | 5        | 5       | -1        | -3        | -1       | -2         | -1      | 0          |
| 532 | 4.5    | 5       | 5         | 5        | 5       | 4        | 4       | -1        | -2        | 0.5      | -1         | 1       | -1         |
| 533 | 5      | 5       | 5         | 5        | 5       | 5        | 5       | -2        | -3        | -1       | 0          | 0       | -1         |
| 534 | 2.5    | 0.5     | 5         | 5        | 2.5     | 2.5      | 2.5     | 2.5       | 0.5       | 1.5      | 0.5        | 0.5     | -1         |
| 535 | 4.5    | 4.5     | 5         | 5        | 4.5     | 4.5      | 4       | -3.5      | -3        | -1.5     | -1         | -2.5    | -1         |
| 536 | 2.5    | 2.5     | 2.5       | 2.5      | 2.5     | 2.5      | 2.5     | -1.5      | 0.5       | 0.5      | 0.5        | -0.5    | 0.5        |
| 537 | 4      | 4       | 3.5       | 5        | 4       | 2.5      | 2.5     | -2        | 0.5       | 0        | -1         | 0.5     | -2         |
| 538 | 3      | 4.5     | 2.5       | 1.5      | 0.5     | 1        | 1.5     | -1.5      | -2        | 0        | -0.5       | 4       | 2.5        |
| 539 | 5      | 4.5     | 5         | 4.5      | 5       | 5        | 5       | -0.5      | -0.5      | 0        | -0.5       | 0       | 0.5        |
| 540 | 3      | 2       | 3         | 3.5      | 4       | 4        | 2       | -1        | 0.5       | 0        | 1.5        | 0       | 0.5        |
| 541 | 2.5    | 1.5     | 2         | 2.5      | 2.5     | 2        | 2.5     | 1.5       | -0.5      | 0.5      | 0.5        | 2       | 0.5        |
| 542 | 5      | 5       | 5         | 5        | 5       | 5        | 5       | -2        | -3        | -2       | -1         | 0       | -1         |
| 543 | 3.5    | 3.5     | 3.5       | 3        | 3.5     | 3.5      | 3       | -0.5      | -1.5      | -0.5     | 0          | 1.5     | 1          |
| 544 | 5      | 5       | 5         | 4.5      | 4.5     | 2.5      | 5       | 0         | -1        | -1       | 0          | 2.5     | -0.5       |

| ID  | LEARN5 | CAREER5 | PEERRELAT | RESPECT5 | SECURE5 | PARTICI5 | HORNOR5 | CAREERfit | INCOMEfit | LEARNfit | BENEFITfit | PARTfit | RESPECTfit |
|-----|--------|---------|-----------|----------|---------|----------|---------|-----------|-----------|----------|------------|---------|------------|
| 545 | 5      | 5       | 5         | 5        | 5       | 5        | 5       | -2        | -1        | -1       | -1         | 0       | -1         |
| 546 | 2.5    | 2       | 4         | 5        | 5       | 3.5      | 5       | -1        | -0.5      | 0.5      | 0          | -0.5    | -2         |
| 547 | 1.5    | 1       | 2         | 3        | 2.5     | 1.5      | 1       | 2         | 0.5       | 2.5      | 0.5        | 2.5     | 1          |
| 548 | 4.5    | 5       | 5         | 5        | 4.5     | 4.5      | 4.5     | -3        | 0         | -0.5     | -0.5       | -2.5    | -1         |
| 549 | 3.5    | 4.5     | 2.5       | 2        | 3       | 1        | 3.5     | -0.5      | -2        | 0.5      | -1         | 3       | 2          |
| 550 | 3.5    | 2.5     | 3         | 3        | 3.5     | 3        | 3       | 0.5       | 0         | -0.5     | 0          | 1       | 0          |
| 551 | 4.5    | 5       | 5         | 5        | 4.5     | 4.5      | 4.5     | -2        | -2.5      | -1.5     | -1.5       | -0.5    | -2         |
| 552 | 2      | 2       | 5         | 5        | 5       | 3        | 4       | 1         | 0.5       | 1        | 1.5        | 0       | -1         |
| 553 | 3.5    | 3       | 5         | 4.5      | 5       | 4.5      | 4       | 0         | 0         | -0.5     | -0.5       | -0.5    | -0.5       |
| 554 | 4.5    | 4       | 4         | 4        | 4       | 4        | 4       | -1        | -1        | -1.5     | -1         | 0       | -1         |
| 555 | 3.5    | 0.5     | 4.5       | 4.5      | 4.5     | 4        | 4       | 2.5       | 2.5       | 0.5      | 2.5        | -1      | -1.5       |
| 556 | 2.5    | 2.5     | 2.5       | 2.5      | 2.5     | 2.5      | 2.5     | 0.5       | 0.5       | 1.5      | 1.5        | 1.5     | 0.5        |
| 557 | 4      | 4       | 2.5       | 2.5      | 2.5     | 4        | 4       | 0         | -0.5      | 0        | 1.5        | 0       | 1.5        |
| 558 | 4.5    | 0.5     | 4.5       | 4.5      | 4.5     | 0.5      | 3.5     | 0.5       | 2.5       | -1.5     | 2.5        | 0.5     | 0.5        |
| 559 | 2      | 1       | 4.5       | 3        | 3       | 3.5      | 4       | 0         | 1.5       | 1        | 0.5        | -0.5    | 0          |
| 560 | 2.5    | 1.5     | 5         | 4.5      | 3.5     | 4        | 3.5     | 1.5       | -0.5      | 0.5      | 0.5        | 0       | 0.5        |
| 561 | 1      | 1       | 4         | 2.5      | 1.5     | 1        | 3       | 2         | 1         | 3        | 2.5        | 3       | 1.5        |
| 562 | 5      | 4       | 4         | 3.5      | 3.5     | 3        | 4.5     | -1        | -0.5      | -2       | -0.5       | -1      | 0.5        |
| 563 | 5      | 5       | 3.5       | 3        | 2.5     | 3        | 1.5     | -2        | -3.5      | -2       | 0          | 0       | 0          |
| 564 | 3      | 4       | 5         | 3.5      | 4       | 3.5      | 3.5     | -1        | -0.5      | 0        | -1         | 0.5     | -0.5       |
| 565 | 5      | 4       | 5         | 5        | 2.5     | 2.5      | 4       | -1        | -1        | -1       | 0          | -0.5    | 0          |
| 566 | 3.5    | 2.5     | 4         | 5        | 3.5     | 3.5      | 3       | 1.5       | -0.5      | 0.5      | 0          | 0.5     | 0          |
| 567 | 3.5    | 2       | 4         | 4        | 4.5     | 3.5      | 2.5     | 1         | -1        | 0.5      | 0          | 0.5     | 0          |
| 568 | 4.5    | 5       | 4         | 4        | 4.5     | 3.5      | 4       | -2        | -2        | -3.5     | -3         | -0.5    | -1         |
| 569 | 4.5    | 4       | 4.5       | 4.5      | 4.5     | 4        | 4       | -1        | -2        | -1.5     | -1         | 0       | -0.5       |
| 570 | 5      | 5       | 3.5       | 4.5      | 5       | 4.5      | 4       | -2        | -2        | -1       | 1.5        | -1.5    | -0.5       |
| 571 | 4      | 5       | 4         | 2.5      | 3       | 2        | 2       | -2        | -2        | -1       | -2         | 1       | 0.5        |
| 572 | 2.5    | 2.5     | 4         | 4        | 4.5     | 4.5      | 3       | 0.5       | 0.5       | 1.5      | 1          | 0.5     | 1          |
| 573 | 2      | 2       | 2.5       | 1.5      | 2       | 2        | 2.5     | 1         | 1.5       | 1        | 0.5        | 1       | 1.5        |
| 574 | 5      | 4.5     | 5         | 4.5      | 5       | 4        | 3       | -0.5      | -4        | -2       | 0.5        | 0       | -0.5       |
| 575 | 5      | 5       | 5         | 5        | 5       | 3        | 4       | -2        | -3        | -2       | -2         | -1      | -1         |
| 576 | 5      | 5       | 4         | 4.5      | 5       | 4        | 4.5     | -2        | -2        | -1       | -2         | 1       | -0.5       |
| 577 | 5      | 4.5     | 3         | 2        | 2.5     | 2        | 3.5     | -0.5      | -1        | -1       | 1          | 2       | 2          |
| 578 | 3      | 3.5     | 4         | 4        | 4       | 4        | 2.5     | -0.5      | 0.5       | 1        | 0.5        | 0       | 0          |

| ID  | LEARN5 | CAREER5 | PEERRELAT | RESPECT5 | SECURE5 | PARTICI5 | HORNOR5 | CAREERfit | INCOMEfit | LEARNfit | BENEFITfit | PARTfit | RESPECTfit |
|-----|--------|---------|-----------|----------|---------|----------|---------|-----------|-----------|----------|------------|---------|------------|
| 579 | 4.5    | 4.5     | 4         | 3        | 2.5     | 2        | 2       | -1.5      | -2.5      | -0.5     | -1         | 2       | 2          |
| 580 | 5      | 4.5     | 5         | 3.5      | 2.5     | 4.5      | 3.5     | -2.5      | -2        | -2       | -3         | -0.5    | 0.5        |
| 581 | 4      | 1       | 1.5       | 1.5      | 1       | 3        | 1.5     | 2         | -1        | -2       | -3         | 1       | 2.5        |
| 582 | 5      | 4       | 4.5       | 5        | 4       | 4        | 3.5     | -1        | -2        | -3       | -2         | 0       | -2         |
| 583 | 3.5    | 3       | 3.5       | 2.5      | 3       | 3.5      | 3       | -1        | 0         | -1.5     | 0          | -1.5    | 0.5        |
| 584 | 3.5    | 4       | 2.5       | 2        | 2       | 0.5      | 2       | -1        | -1        | 0.5      | 0          | 3.5     | 2          |
| 585 | 5      | 5       | 3         | 3        | 4.5     | 2.5      | 3       | -2        | -1.5      | -2       | -1.5       | 0.5     | 1          |
| 586 | 3.5    | 4.5     | 3.5       | 3        | 3       | 2        | 3.5     | -3.5      | -2        | -0.5     | 0          | 1       | 0          |
| 587 | 3      | 3       | 4.5       | 4.5      | 5       | 4        | 5       | 0         | 1         | 0        | 1.5        | -1      | -0.5       |
| 588 | 4.5    | 4.5     | 3         | 3.5      | 2       | 1        | 1.5     | -1.5      | -2        | -0.5     | -1.5       | 2       | 0.5        |
| 589 | 4.5    | 4.5     | 5         | 5        | 4.5     | 4.5      | 4.5     | -2.5      | -2        | -1.5     | -1.5       | -2.5    | -3         |
| 590 | 3      | 2       | 4         | 4.5      | 5       | 4        | 5       | 1         | -0.5      | 0        | 0          | -1      | -1.5       |
| 591 | 4      | 5       | 3.5       | 4        | 3       | 1.5      | 3       | -2        | -1.5      | -1       | -1         | 2.5     | 0          |
| 592 | 5      | 4       | 4         | 4.5      | 5       | 5        | 4.5     | -3        | -2        | -2       | -1         | -1      | -1.5       |
| 593 | 2      | 3       | 5         | 4        | 4.5     | 3        | 4       | 0         | -2.5      | 0        | -2.5       | -1      | 0          |
| 594 | 2      | 2.5     | 4         | 4        | 3       | 3        | 3.5     | 0.5       | -0.5      | 1        | 0          | 1       | 0          |
| 595 | 1.5    | 2       | 4.5       | 5        | 4.5     | 4.5      | 4       | -1        | -1.5      | -0.5     | -2.5       | -3.5    | -1         |
| 596 | 1      | 2       | 5         | 4.5      | 3       | 1.5      | 3.5     | 1         | 1         | 2        | 1.5        | 2.5     | -0.5       |
| 597 | 3.5    | 2.5     | 2.5       | 3        | 3       | 2.5      | 3.5     | 0.5       | -2        | -0.5     | -3.5       | 2.5     | 0          |
| 598 | 5      | 4.5     | 5         | 4        | 5       | 3.5      | 4       | -1.5      | -1        | 0        | 0          | 1.5     | 1          |
| 599 | 4.5    | 4       | 4         | 4        | 4.5     | 4        | 4       | -3        | -2.5      | -2.5     | -3.5       | -2      | 0          |
| 600 | 2.5    | 4.5     | 4.5       | 4.5      | 4.5     | 4.5      | 4.5     | -1.5      | -3.5      | 0.5      | 0.5        | -2.5    | -3.5       |
| 601 | 5      | 4.5     | 5         | 4.5      | 5       | 5        | 4       | -0.5      | -1        | -1       | 0          | -1      | -1.5       |
| 602 | 3.5    | 4       | 3         | 3        | 2.5     | 1        | 3.5     | -2        | -3.5      | -1.5     | -3.5       | 0       | 1          |
| 603 | 3.5    | 5       | 1.5       | 1.5      | 1       | 3        | 1       | -4        | -1        | -0.5     | -1.5       | 0       | 2.5        |
| 604 | 4.5    | 4.5     | 4.5       | 5        | 4.5     | 4.5      | 4.5     | -2.5      | -2.5      | -0.5     | -1.5       | -0.5    | -2         |
| 605 | 2      | 4.5     | 4.5       | 4.5      | 4       | 4.5      | 3.5     | -2.5      | -2        | 2        | 0          | -2.5    | -1.5       |
| 606 | 3      | 5       | 4         | 3.5      | 3       | 3.5      | 3.5     | -2        | -1.5      | 1        | -1         | 0.5     | 0.5        |
| 607 | 4      | 4       | 3         | 2.5      | 3       | 3        | 3.5     | -3        | -2        | -2       | -3         | -2      | 1.5        |
| 608 | 3.5    | 3.5     | 3.5       | 3.5      | 3       | 4        | 4       | -0.5      | -1        | 0.5      | -2         | -2      | 0.5        |
| 609 | 3      | 3.5     | 2.5       | 3        | 1.5     | 1        | 1.5     | -2.5      | -0.5      | -1       | -1.5       | 0       | 1          |
| 610 | 4.5    | 4.5     | 4.5       | 5        | 4.5     | 4.5      | 4.5     | -2.5      | -2.5      | -0.5     | -1.5       | -0.5    | -2         |
| 611 | 4      | 2.5     | 3         | 3        | 2.5     | 2.5      | 2.5     | 0.5       | -1.5      | -1       | 0.5        | 0.5     | 1          |
| 612 | 3.5    | 4       | 3         | 3.5      | 2.5     | 1.5      | 3.5     | -1        | -2        | -0.5     | -0.5       | 1.5     | -0.5       |

| ID  | LEARN5 | CAREER5 | PEERRELAT | RESPECT5 | SECURE5 | PARTICI5 | HORNOR5 | CAREERfit | INCOMEfit | LEARNfit | BENEFITfit | PARTfit | RESPECTfit |
|-----|--------|---------|-----------|----------|---------|----------|---------|-----------|-----------|----------|------------|---------|------------|
| 613 | 5      | 4       | 3.5       | 3        | 3.5     | 1        | 1       | -1        | -1.5      | 0        | -2         | 1       | 1          |
| 614 | 3      | 1.5     | 4         | 3.5      | 3.5     | 3        | 1.5     | -0.5      | 1         | 0        | 2          | -1      | 0.5        |
| 615 | 3.5    | 2       | 3.5       | 3.5      | 3       | 4        | 4       | 0         | -1        | 0.5      | -2         | -2      | 0.5        |
| 616 | 2.5    | 3       | 4.5       | 3.5      | 3       | 2.5      | 2.5     | 0         | -1.5      | 0.5      | 0.5        | 0.5     | 1.5        |
| 617 | 4      | 2       | 4         | 4        | 4       | 2        | 2       | 0         | 1         | -1       | 1          | 0       | 0          |
| 618 | 5      | 5       | 5         | 4.5      | 5       | 4        | 4       | -1        | -1        | -2       | -1         | 0       | -0.5       |
| 619 | 2.5    | 2.5     | 4         | 3        | 2.5     | 2.5      | 2.5     | 0.5       | 0.5       | 0.5      | 0.5        | 0.5     | 1          |
| 620 | 4.5    | 3.5     | 5         | 4.5      | 5       | 4        | 4.5     | -0.5      | -2.5      | -1.5     | -0.5       | 0       | 0.5        |
| 621 | 4.5    | 4.5     | 5         | 5        | 5       | 4.5      | 4.5     | -1.5      | -0.5      | 0.5      | 0          | -0.5    | -1         |
| 622 | 4      | 4       | 4         | 5        | 2.5     | 3.5      | 3       | -2        | -0.5      | -1       | 1          | -0.5    | -1         |
| 623 | 5      | 4       | 4.5       | 4.5      | 4       | 3.5      | 5       | -3        | -2        | -4       | -3         | -1.5    | -1.5       |
| 624 | 5      | 4.5     | 2.5       | 3        | 2       | 3        | 2       | -1.5      | -3.5      | -2       | -1.5       | 1       | 1          |
| 625 | 2.5    | 4       | 4         | 4        | 4.5     | 4        | 3.5     | -1        | 2.5       | 1.5      | 1.5        | -2      | -1         |
| 626 | 3      | 2.5     | 5         | 5        | 4       | 5        | 5       | 0.5       | 0         | 0        | 0.5        | 0       | -1         |
| 627 | 4      | 5       | 4         | 4        | 5       | 4        | 4       | -2        | -2        | -1       | -2         | -2      | 0          |
| 628 | 3.5    | 4       | 4         | 3.5      | 3.5     | 4        | 4.5     | -1        | -1.5      | 0.5      | -2.5       | 0       | 0.5        |
| 629 | 5      | 4       | 4         | 4        | 4       | 4        | 2.5     | -3        | -2        | -2       | -2         | 0       | -1         |
| 630 | 4      | 5       | 4         | 4        | 5       | 4        | 5       | -2        | 0         | -1       | -1         | 1       | 0          |
| 631 | 4      | 3       | 3         | 4        | 4       | 4        | 5       | 0         | -1.5      | -2       | -3         | -1      | 1          |
| 632 | 3.5    | 4       | 4         | 4        | 4       | 3        | 4       | -1        | 0.5       | 0.5      | -3         | 1       | 0          |
| 633 | 2.5    | 3.5     | 3.5       | 3.5      | 4       | 2.5      | 4       | -0.5      | 0         | 1.5      | 1.5        | 1.5     | 0.5        |
| 634 | 4.5    | 4.5     | 4         | 4.5      | 4.5     | 4.5      | 4.5     | -1.5      | -1.5      | -1.5     | -0.5       | -1.5    | -0.5       |
| 635 | 5      | 5       | 5         | 5        | 5       | 5        | 4       | -3        | -2        | -3       | -3         | -2      | -2         |
| 636 | 1      | 4       | 2.5       | 4.5      | 3       | 1.5      | 2.5     | -1        | 1.5       | 2        | 0.5        | 1.5     | -0.5       |
| 637 | 3.5    | 4.5     | 4.5       | 4.5      | 4.5     | 3.5      | 4       | -1.5      | -1.5      | 0.5      | 0.5        | 0.5     | -0.5       |
| 638 | 3      | 2.5     | 5         | 4        | 3       | 3        | 2.5     | -0.5      | 1         | 0        | -0.5       | 2       | 0          |
| 639 | 2      | 2.5     | 4.5       | 4.5      | 4       | 4        | 4.5     | -0.5      | 0.5       | 1        | -0.5       | -2      | -1.5       |
| 640 | 4      | 5       | 4.5       | 4        | 3.5     | 4        | 4       | -4        | -3        | -2       | -3         | 1       | 0          |
| 641 | 3      | 4       | 4.5       | 2        | 1       | 4        | 2.5     | -1        | 0.5       | 0        | 2          | 0       | 1          |
| 642 | 5      | 5       | 5         | 5        | 3       | 3        | 4       | -3        | -1        | -1       | -3         | -1      | -1         |
| 643 | 4      | 4       | 2         | 3        | 4       | 4        | 3.5     | -2        | -1        | -1       | -1         | -2      | 1          |
| 644 | 5      | 5       | 3         | 2.5      | 3.5     | 3.5      | 5       | -3        | -1.5      | -2       | -3         | -0.5    | 1.5        |
| 645 | 1.5    | 2       | 3         | 2.5      | 4       | 3        | 3       | 0         | -1        | 1.5      | 2          | 0       | 0.5        |
| 646 | 4      | 1.5     | 2         | 3        | 4       | 4        | 3       | 1.5       | -1        | -1       | -0.5       | -1      | 0          |

| ID  | LEARN5 | CAREER5 | PEERRELAT | RESPECT5 | SECURE5 | PARTICI5 | HORNOR5 | CAREERfit | INCOMEfit | LEARNfit | BENEFITfit | PARTfit | RESPECTfit |
|-----|--------|---------|-----------|----------|---------|----------|---------|-----------|-----------|----------|------------|---------|------------|
| 647 | 2.5    | 1.5     | 3         | 4        | 4       | 3        | 1       | 1.5       | 1.5       | 1.5      | 0          | 0       | 0          |
| 648 | 3      | 2.5     | 4         | 3        | 1.5     | 2.5      | 2.5     | -0.5      | 0.5       | 0        | -0.5       | 0.5     | 1          |
| 649 | 2.5    | 3       | 3         | 2.5      | 3       | 3        | 3.5     | 0         | 0.5       | 0.5      | 0.5        | 1       | 1.5        |
| 650 | 4      | 2.5     | 3         | 3.5      | 4       | 2.5      | 1       | 0.5       | -2        | 0        | -2         | 0.5     | -0.5       |
| 651 | 5      | 5       | 5         | 5        | 5       | 4        | 5       | -4        | -2        | 0        | -3         | -2      | -1         |
| 652 | 5      | 1.5     | 5         | 5        | 5       | 5        | 5       | 0.5       | -2        | -2       | -2         | -1      | -2         |
| 653 | 1.5    | 4       | 3.5       | 1.5      | 1.5     | 3.5      | 2.5     | -1        | 0.5       | 1.5      | 1.5        | 0.5     | 1.5        |
| 654 | 2.5    | 2       | 3         | 3        | 3       | 2.5      | 3       | 1         | -0.5      | 0.5      | 0.5        | 0.5     | 1          |
| 655 | 3.5    | 5       | 3.5       | 4        | 4       | 3.5      | 3       | -3        | -1.5      | -0.5     | -1.5       | 0.5     | 0          |
| 656 | 3.5    | 4       | 2.5       | 4.5      | 4       | 4        | 2.5     | -2        | -1        | -1.5     | -3         | -3      | -1.5       |



| ID | STABLEfit | RELATIONf | HORNORfit | POFIT    | relatedfj | achvmntfitscore |
|----|-----------|-----------|-----------|----------|-----------|-----------------|
| 1  | 0.5       | 2.5       | 0.5       | -0.16667 | 0.8       | -1.375          |
| 2  | 1.5       | 2         | 1         | 0.277778 | 0.6       | -0.125          |
| 3  | 1.5       | -0.5      | 0.5       | -0.16667 | 0.1       | -0.5            |
| 4  | 3.5       | 3         | 1         | 0.5      | 1.8       | -1.125          |
| 5  | 0         | 0         | -1        | 0.444444 | 0         | 1               |
| 6  | 0.5       | 1.5       | 1.5       | 0.222222 | 0.7       | -0.375          |
| 7  | 0         | -1        | 0         | -0.5     | -0.4      | -0.625          |
| 8  | -0.5      | 0         | 0.5       | -0.16667 | 0.2       | -0.625          |
| 9  | 2.5       | -1        | 1         | -0.16667 | 0.9       | -1.5            |
| 10 | 1         | 0         | -2        | -1.5     | -0.3      | -3              |
| 11 | 0         | 0         | -1        | -1.16667 | -0.6      | -1.875          |
| 12 | -1        | 0         | 0.5       | 0.277778 | 0.1       | 0.5             |
| 13 | -0.5      | -1        | -2        | -1.33333 | -1        | -1.75           |
| 14 | 1         | 1         | 1         | 0.666667 | 0.5       | 0.875           |
| 15 | 0.5       | 1.5       | 2         | -0.38889 | 0.8       | -1.875          |
| 16 | -2        | -3        | -2        | -1.72222 | -1.9      | -1.5            |
| 17 | 1.5       | -1        | 0         | -0.27778 | -0.2      | -0.375          |
| 18 | 1.5       | 0         | 0.5       | 0        | 0.3       | -0.375          |
| 19 | 0.5       | 1         | -0.5      | 0.333333 | 0.5       | 0.125           |
| 20 | -1        | 0         | 0.5       | -0.83333 | 0         | -1.875          |
| 21 | 1         | 2.5       | 1         | 1.166667 | 0.9       | 1.5             |
| 22 | 0         | 2.5       | 1         | 0.555556 | 0.7       | 0.375           |
| 23 | 0.5       | -0.5      | 1         | 0.944444 | 0.5       | 1.5             |
| 24 | 0         | -0.5      | 1.5       | 0.055556 | 0         | 0.125           |
| 25 | -1        | -1        | -1        | -1.66667 | -1        | -2.5            |
| 26 | 1         | -0.5      | -1        | -0.83333 | -0.2      | -1.625          |
| 27 | -1        | 0         | -1        | -1.22222 | -0.4      | -2.25           |
| 28 | -2        | -1        | -1        | -1.77778 | -1.3      | -2.375          |
| 29 | 0         | 0         | -1        | -0.16667 | -0.5      | 0.25            |
| 30 | -1        | -0.5      | -2        | -1.88889 | -2.1      | -1.625          |
| 31 | -1        | -1.5      | -2        | -1.16667 | -1.2      | -1.125          |
| 32 | -0.5      | 0.5       | 0         | 0.277778 | 0.2       | 0.375           |
| 33 | 1         | 0.5       | 1         | -0.66667 | 0.3       | -1.875          |
| 34 | 0.5       | -1        | 0.5       | -0.5     | 0         | -1.125          |

| ID | STABLEfit | RELATIONf | HORNORfit | POFIT    | relatedf | achvmtfitscore |
|----|-----------|-----------|-----------|----------|----------|----------------|
| 35 | -2        | -1        | -0.5      | -1.38889 | -1       | -1.875         |
| 36 | 0.5       | 1         | 1.5       | 0.111111 | 0.9      | -0.875         |
| 37 | 0         | -1.5      | -0.5      | -0.44444 | -0.5     | -0.375         |
| 38 | -0.5      | 0.5       | -0.5      | -0.33333 | -0.4     | -0.25          |
| 39 | -1        | 0         | -0.5      | -0.83333 | -0.7     | -1             |
| 40 | -1.5      | -0.5      | -2        | -0.5     | -0.7     | -0.25          |
| 41 | 0         | 0         | -1        | -0.5     | -0.3     | -0.75          |
| 42 | -1        | 0.5       | -1        | -0.88889 | -0.7     | -1.125         |
| 43 | 0         | 0         | -1        | -0.77778 | -0.4     | -1.25          |
| 44 | 1         | 0.5       | -1        | 0.222222 | 0.4      | 0              |
| 45 | -2        | 0         | -1        | -2.22222 | -2       | -2.5           |
| 46 | -1.5      | -0.5      | -1.5      | -1.16667 | -0.9     | -1.5           |
| 47 | -1        | 2         | 1         | -0.22222 | 0.6      | -1.25          |
| 48 | 2         | 1.5       | 0         | -0.16667 | 0.8      | -1.375         |
| 49 | -1        | -1        | 0         | -0.05556 | -0.2     | 0.125          |
| 50 | 1.5       | 2.5       | 0         | 0.111111 | 0.9      | -0.875         |
| 51 | -1.5      | 1.5       | 2.5       | -0.22222 | 0.7      | -1.375         |
| 52 | 0.5       | -0.5      | -2        | -1.27778 | -0.7     | -2             |
| 53 | 1         | 0.5       | 1         | -0.38889 | 0.3      | -1.25          |
| 54 | -0.5      | -1        | -0.5      | 0        | -0.4     | 0.5            |
| 55 | -1        | 0         | -0.5      | -0.5     | -0.1     | -1             |
| 56 | 0         | -2        | -0.5      | -0.61111 | -0.8     | -0.375         |
| 57 | 0         | 0.5       | -1.5      | -0.61111 | -0.3     | -1             |
| 58 | 0.5       | 0         | -1        | -0.11111 | 0.1      | -0.375         |
| 59 | 2.5       | 1.5       | 1.5       | 1.16667  | 1.5      | 0.75           |
| 60 | 3         | 0.5       | -0.5      | -0.33333 | 0.6      | -1.5           |
| 61 | 1.5       | 0.5       | 1         | 0.055556 | 1.3      | -1.5           |
| 62 | -1.5      | 0.5       | -0.5      | -1.22222 | -0.7     | -1.875         |
| 63 | -0.5      | 0         | 0         | -0.88889 | -0.3     | -1.625         |
| 64 | -0.5      | -0.5      | 0.5       | 0.722222 | 0.1      | 1.5            |
| 65 | 0         | 1.5       | 0.5       | 1.11111  | 0.3      | 2.125          |
| 66 | -1        | 0.5       | -1        | -0.83333 | -0.7     | -1             |
| 67 | -1        | 0         | 1         | -0.16667 | 0.1      | -0.5           |
| 68 | 0         | 0         | -1        | -0.38889 | -0.4     | -0.375         |

| ID  | STABLEfit | RELATIONf | HORNORfit | POFIT    | relatedf | achvmtfitscore |
|-----|-----------|-----------|-----------|----------|----------|----------------|
| 69  | -2        | 0         | -0.5      | -1.16667 | -0.6     | -1.875         |
| 70  | -0.5      | 4.5       | -1.5      | -0.33333 | 0.5      | -1.375         |
| 71  | -1        | -1        | -0.5      | -0.55556 | -0.6     | -0.5           |
| 72  | 0.5       | 0.5       | -1        | -0.55556 | -0.1     | -1.125         |
| 73  | 0         | 0         | 0.5       | -0.44444 | -0.1     | -0.875         |
| 74  | 1         | 0         | 0.5       | -0.05556 | 0        | -0.125         |
| 75  | 0.5       | -0.5      | 0.5       | -0.33333 | -0.2     | -0.5           |
| 76  | 0         | 0.5       | 0.5       | -0.05556 | 0.1      | -0.25          |
| 77  | 0         | 0         | -1        | -0.33333 | -0.5     | -0.125         |
| 78  | 0.5       | 0         | 1.5       | 0        | 0.5      | -0.625         |
| 79  | 0.5       | 1.5       | -0.5      | -0.33333 | 0.5      | -1.375         |
| 80  | 0.5       | 0         | -0.5      | 0.61111  | 0        | 1.375          |
| 81  | 0.5       | 0         | 0.5       | 0.38889  | 0.5      | 0.25           |
| 82  | 0         | 1         | 0         | 0.5      | 0.5      | 0.5            |
| 83  | -1        | 1         | -0.5      | -1.22222 | -0.6     | -2             |
| 84  | -1        | 1         | 0.5       | -0.5     | -0.1     | -1             |
| 85  | 1.5       | 0         | 2.5       | 0.22222  | 0.6      | -0.25          |
| 86  | -1        | 0         | 0         | -0.66667 | -0.7     | -0.625         |
| 87  | 1.5       | 0         | -0.5      | -0.05556 | 0.4      | -0.625         |
| 88  | 1.5       | 1.5       | 0.5       | -0.11111 | 0.9      | -1.375         |
| 89  | 0         | 0         | 0.5       | -0.16667 | -0.3     | 0              |
| 90  | -1        | 0         | -3        | -1.16667 | -1.4     | -0.875         |
| 91  | 1         | 0         | -1        | -1.05556 | -0.2     | -2.125         |
| 92  | 0         | 0.5       | -1        | -0.94444 | -0.3     | -1.75          |
| 93  | 0.5       | 1.5       | -0.5      | -0.5     | 0.1      | -1.25          |
| 94  | 0.5       | 2.5       | 0.5       | 0.16667  | 1.1      | -1             |
| 95  | -2        | 0         | 1         | -0.61111 | -0.6     | -0.625         |
| 96  | -1        | -1        | -1        | 0.05556  | -0.8     | 1.125          |
| 97  | -1        | 0         | -1        | -0.88889 | -0.7     | -1.125         |
| 98  | -2        | -0.5      | -2        | -1.94444 | -1.8     | -2.125         |
| 99  | 1         | 2         | 2.5       | 0.27778  | 1.5      | -1.25          |
| 100 | -3        | -0.5      | -0.5      | -1.88889 | -1.4     | -2.5           |
| 101 | -0.5      | 0         | -2        | -1.66667 | -1.4     | -2             |
| 102 | 0.5       | 0.5       | 0         | -0.83333 | 0.3      | -2.25          |

| ID  | STABLEfit | RELATIONf | HORNORfit | POFIT    | relatedf | achvmtfitscore |
|-----|-----------|-----------|-----------|----------|----------|----------------|
| 103 | 0.5       | -1        | -1        | -1.05556 | -0.4     | -1.875         |
| 104 | 0         | -1        | -1.5      | -0.22222 | -0.6     | 0.25           |
| 105 | -1        | 1         | 0         | -0.16667 | 0        | -0.375         |
| 106 | 0         | 0         | 0         | -0.55556 | -0.2     | -1             |
| 107 | 1         | 1         | 1.5       | 0.16667  | 0.8      | -0.625         |
| 108 | 1.5       | 1         | -0.5      | -0.05556 | 0.5      | -0.75          |
| 109 | 1         | 0         | -1.5      | -0.77778 | -0.4     | -1.25          |
| 110 | 0.5       | 0         | -0.5      | -1.33333 | -0.2     | -2.75          |
| 111 | 0         | 0         | 0         | -0.11111 | 0.3      | -0.625         |
| 112 | 1         | -1        | -1        | 0.05556  | -0.3     | 0.5            |
| 113 | 0         | 1         | 0.5       | -0.38889 | 0.3      | -1.25          |
| 114 | 1.5       | 2         | 1.5       | 0.61111  | 2.1      | -1.25          |
| 115 | -1        | 0         | -2        | -1.55556 | -0.8     | -2.5           |
| 116 | 0.5       | 1.5       | 1.5       | -0.27778 | 0.6      | -1.375         |
| 117 | 0.5       | 0.5       | 0.5       | -0.16667 | -0.1     | -0.25          |
| 118 | -1        | 0         | -2        | -0.88889 | -1.4     | -0.25          |
| 119 | 0.5       | 1.5       | 1.5       | -0.22222 | 0.6      | -1.25          |
| 120 | 1.5       | 1         | 0.5       | -0.11111 | 1.2      | -1.75          |
| 121 | -3        | -1        | -2        | -1.05556 | -1.8     | -0.125         |
| 122 | -0.5      | 2         | 0         | -0.55556 | 0.3      | -1.625         |
| 123 | 1         | 1         | 0         | -0.16667 | 0.9      | -1.5           |
| 124 | 0.5       | 1.5       | 0.5       | 1.22222  | 1.5      | 0.875          |
| 125 | -1        | 1.5       | 0         | -0.11111 | 0.4      | -0.75          |
| 126 | 0.5       | 0.5       | 1.5       | 0.33333  | 1.1      | -0.625         |
| 127 | 1.5       | 0         | 0         | -0.55556 | 0.1      | -1.375         |
| 128 | 1.5       | 0         | -0.5      | 0        | 0.1      | -0.125         |
| 129 | 0.5       | 1.5       | 1         | 0.72222  | 1.4      | -0.125         |
| 130 | 1         | 2         | 1.5       | 1.5      | 1.9      | 1              |
| 131 | -2        | -0.5      | -1        | -1       | -0.7     | -1.375         |
| 132 | -1        | 1.5       | -2        | -0.88889 | -0.2     | -1.75          |
| 133 | -1        | 0.5       | -2        | -1       | -0.5     | -1.625         |
| 134 | -0.5      | 0.5       | -2        | -0.88889 | -0.4     | -1.5           |
| 135 | -1        | 0         | 0         | -0.22222 | 0.3      | -0.875         |
| 136 | -0.5      | -0.5      | -1.5      | -1.38889 | -0.8     | -2.125         |

| ID  | STABLEfit | RELATIONf | HORNORfit | POFIT    | relatedf | achvmtfitscore |
|-----|-----------|-----------|-----------|----------|----------|----------------|
| 137 | 0.5       | 1         | 1.5       | 0.222222 | 1.3      | -1.125         |
| 138 | -1        | 0.5       | -1.5      | -1.94444 | -1.3     | -2.75          |
| 139 | 3         | 1         | 3.5       | 0.722222 | 2.7      | -1.75          |
| 140 | 0         | 1         | 0.5       | -0.66667 | 0.7      | -2.375         |
| 141 | 0         | -0.5      | -0.5      | 0.388889 | -0.4     | 1.375          |
| 142 | 0.5       | 0         | 0         | 0.944444 | 0.2      | 1.875          |
| 143 | -1        | 0         | -1        | -1.22222 | -0.6     | -2             |
| 144 | -2        | 0         | -1        | -1.5     | -1.1     | -2             |
| 145 | -1        | 0         | 1         | -0.72222 | -0.2     | -1.375         |
| 146 | -1        | 0         | 0         | -1.11111 | -0.7     | -1.625         |
| 147 | -1        | 2         | 2         | -0.88889 | 0.4      | -2.5           |
| 148 | 0         | 0         | 0         | -0.22222 | 0        | -0.5           |
| 149 | -1        | 0         | -1        | 0.166667 | 0.2      | 0.125          |
| 150 | 1         | 1.5       | 0.5       | 0.444444 | 1.3      | -0.625         |
| 151 | -0.5      | 0         | 0.5       | -0.61111 | -0.6     | -0.625         |
| 152 | -1.5      | 0         | 0.5       | -0.27778 | 0        | -0.625         |
| 153 | 2.5       | 0         | 0.5       | 0.5      | 0.9      | 0              |
| 154 | 0         | -1        | -1        | -0.77778 | -0.4     | -1.25          |
| 155 | -0.5      | 0         | -2.5      | -0.55556 | -0.8     | -0.25          |
| 156 | 2.5       | 2.5       | -0.5      | 0.055556 | 0.8      | -0.875         |
| 157 | 1.5       | -0.5      | 1.5       | 0.5      | 0.8      | 0.125          |
| 158 | 0         | -1        | -1        | -0.55556 | -0.4     | -0.75          |
| 159 | 3.5       | 0         | 2.5       | 1.05556  | 2.4      | -0.625         |
| 160 | 3.5       | 2.5       | 1.5       | 1.16667  | 2.4      | -0.375         |
| 161 | -0.5      | -0.5      | 0         | -0.22222 | -0.4     | 0              |
| 162 | 0.5       | 0         | -0.5      | -0.61111 | -0.3     | -1             |
| 163 | 3         | 3         | 3.5       | 2.66667  | 2.9      | 2.375          |
| 164 | -0.5      | -0.5      | -1        | -0.5     | -0.8     | -0.125         |
| 165 | -1.5      | 0.5       | 0.5       | -0.05556 | 0.1      | -0.25          |
| 166 | 0.5       | 1.5       | 0.5       | 0.66667  | 0.9      | 0.375          |
| 167 | -1        | -1        | 0         | -1.05556 | -1.1     | -1             |
| 168 | 0.5       | 0         | 0.5       | -0.22222 | 0.1      | -0.625         |
| 169 | 1         | 1.5       | 0         | 0        | 0.5      | -0.625         |
| 170 | 0.5       | 1         | 0.5       | 0.055556 | 0.5      | -0.5           |

| ID  | STABLEfit | RELATIONf | HORNORfit | POFIT    | relatedf | achvmtfitscore |
|-----|-----------|-----------|-----------|----------|----------|----------------|
| 171 | 0         | 0.5       | 0.5       | -0.05556 | 0.6      | -0.875         |
| 172 | 0.5       | -0.5      | -3        | -0.61111 | -1.1     | 0              |
| 173 | 1.5       | 1.5       | 2.5       | 1.22222  | 1.7      | 0.625          |
| 174 | 0         | 2.5       | 1         | -0.16667 | 0.9      | -1.5           |
| 175 | 1.5       | 0.5       | 0         | 0.11111  | 0.6      | -0.5           |
| 176 | -2        | 0         | -0.5      | -1.66667 | -1.1     | -2.375         |
| 177 | 1         | 3         | -0.5      | -0.88889 | 0.4      | -2.5           |
| 178 | -1        | 1         | 0         | 0.11111  | -0.1     | 0.375          |
| 179 | -2        | -0.5      | 0         | -0.5     | -1.1     | 0.25           |
| 180 | 0.5       | -3        | 0         | -0.61111 | -0.3     | -1             |
| 181 | -0.5      | -0.5      | -0.5      | -0.55556 | -0.5     | -0.625         |
| 182 | -1        | 0.5       | -0.5      | -0.44444 | 0        | -1             |
| 183 | -1        | 0         | 0         | -0.27778 | -1.2     | 0.875          |
| 184 | -2        | -1        | -0.5      | -0.94444 | -1.2     | -0.625         |
| 185 | -2.5      | -0.5      | -0.5      | -1.44444 | -1.5     | -1.375         |
| 186 | -0.5      | -1        | -1.5      | -1.11111 | -0.8     | -1.5           |
| 187 | -2        | 1         | -0.5      | 0.33333  | -0.2     | 1              |
| 188 | 0         | 0         | -1        | -0.72222 | -0.3     | -1.25          |
| 189 | 1         | 0         | -0.5      | 0.55556  | 0.5      | 0.625          |
| 190 | -2        | -1        | -0.5      | -0.5     | -0.4     | -0.625         |
| 191 | -1        | 0         | -3        | -1.72222 | -1.7     | -1.75          |
| 192 | 0         | 0         | -2        | -0.11111 | -0.4     | 0.25           |
| 193 | 0         | 1.5       | 0         | 0.05556  | 0.3      | -0.25          |
| 194 | 1.5       | -0.5      | -0.5      | -1.22222 | -0.1     | -2.625         |
| 195 | 1         | -0.5      | 0.5       | -1.27778 | 0.2      | -3.125         |
| 196 | -0.5      | 0         | 2         | -0.22222 | 0.4      | -1             |
| 197 | -1        | 0         | -3        | -0.77778 | -1       | -0.5           |
| 198 | 2         | 1.5       | -0.5      | -1       | 0.2      | -2.5           |
| 199 | -1        | 1         | -2        | -0.05556 | -1.2     | 1.375          |
| 200 | 0.5       | 1         | 0.5       | -0.94444 | 0.5      | -2.75          |
| 201 | 0.5       | 1.5       | -1        | -0.94444 | 0.1      | -2.25          |
| 202 | -0.5      | -0.5      | 0         | 0.11111  | -0.1     | 0.375          |
| 203 | -1.5      | -0.5      | 1.5       | -0.33333 | -0.3     | -0.375         |
| 204 | 1.5       | 0.5       | -1        | 1.44444  | 1        | 2              |

| ID  | STABLEfit | RELATIONf | HORNORfit | POFIT     | relatedf | achvmtfitscore |
|-----|-----------|-----------|-----------|-----------|----------|----------------|
| 205 | 1.5       | 1.5       | 3         | 1.555556  | 1.8      | 1.25           |
| 206 | 0.5       | 0         | 0         | 1         | 0.5      | 1.625          |
| 207 | 2.5       | 0.5       | 1.5       | 0.555556  | 1.9      | -1.125         |
| 208 | -0.5      | 1.5       | -0.5      | -1        | 0.6      | -3             |
| 209 | 1         | 1         | -0.5      | 0.222222  | 0.8      | -0.5           |
| 210 | -1        | -1        | -3        | -1.555556 | -0.7     | -2.625         |
| 211 | 1         | 1         | 1         | 0.055556  | 1        | -1.125         |
| 212 | -0.5      | 1.5       | 1.5       | 1         | 0.9      | 1.125          |
| 213 | -3        | 0         | 0         | -0.444444 | -0.3     | -0.625         |
| 214 | 0         | -2        | -1        | -0.16667  | -0.5     | 0.25           |
| 215 | 0         | 1.5       | 0         | -0.16667  | 0.3      | -0.75          |
| 216 | 2.5       | 2         | 2.5       | 1.277778  | 1.9      | 0.5            |
| 217 | 0         | 0.5       | -1        | 0.166667  | -0.4     | 0.875          |
| 218 | 3.5       | 2         | -0.5      | 0.722222  | 2        | -0.875         |
| 219 | 0         | 0         | -0.5      | -1.555556 | -0.6     | -2.75          |
| 220 | 0         | 0.5       | 0         | -0.16667  | 0.5      | -1             |
| 221 | 0.5       | 0         | -1        | -1        | -0.7     | -1.375         |
| 222 | 0         | 0         | 0.5       | -0.944444 | 0.5      | -2.75          |
| 223 | 1.5       | -1        | -2        | -1.11111  | -0.4     | -2             |
| 224 | 0.5       | -1        | -2        | -1.055556 | -0.6     | -1.625         |
| 225 | 0.5       | -0.5      | -1        | -1.16667  | -0.5     | -2             |
| 226 | -3        | -1        | -3        | -2.66667  | -2.2     | -3.25          |
| 227 | 0.5       | 0         | 1         | 1         | 0.4      | 1.75           |
| 228 | 3.5       | 2.5       | 2.5       | 0.111111  | 2.2      | -2.5           |
| 229 | 0.5       | 1         | 0         | -0.72222  | 0.1      | -1.75          |
| 230 | 0.5       | -0.5      | 0         | -0.833333 | -0.3     | -1.5           |
| 231 | -0.5      | 0         | 0         | -0.88889  | 0.3      | -2.375         |
| 232 | 0         | 1         | 2.5       | 0.166667  | 1.5      | -1.5           |
| 233 | 1.5       | 2.5       | 2.5       | 0.388889  | 2        | -1.625         |
| 234 | 0.5       | 3         | 1         | -0.055556 | 0.9      | -1.25          |
| 235 | -3        | 0.5       | -4        | -1.77778  | -1.7     | -1.875         |
| 236 | 0         | 0         | 2         | 1         | 0.7      | 1.375          |
| 237 | -2        | 1         | -3        | -1.72222  | -0.7     | -3             |
| 238 | -0.5      | 0.5       | -0.5      | -0.38889  | -0.1     | -0.75          |

| ID  | STABLEfit | RELATIONf | HORNORfit | POFIT    | relatedf | achvmtfitscore |
|-----|-----------|-----------|-----------|----------|----------|----------------|
| 239 | -0.5      | 0         | -0.5      | -0.11111 | 0.2      | -0.5           |
| 240 | -2        | 1         | -3        | -1.77778 | -1.9     | -1.625         |
| 241 | -0.5      | 0.5       | 0         | 0.333333 | 0        | 0.75           |
| 242 | 0         | 2.5       | 1         | -0.11111 | 0.7      | -1.125         |
| 243 | 0.5       | 2         | -0.5      | -0.88889 | 0.7      | -2.875         |
| 244 | -1        | -1        | -0.5      | -1.72222 | -1.1     | -2.5           |
| 245 | -2        | 0         | -2        | -1.61111 | -1.4     | -1.875         |
| 246 | -1        | 0         | -1.5      | -1.33333 | -0.9     | -1.875         |
| 247 | 0         | 0         | -0.5      | -1       | -0.3     | -1.875         |
| 248 | -0.5      | 0         | -1.5      | -1.22222 | -0.3     | -2.375         |
| 249 | 1         | 1.5       | 1         | 0.666667 | 1        | 0.25           |
| 250 | 0         | 0.5       | -1        | -0.5     | -0.1     | -1             |
| 251 | -1.5      | 0.5       | -2        | -0.72222 | -0.7     | -0.75          |
| 252 | -1        | 1         | -1        | -0.61111 | -0.4     | -0.875         |
| 253 | 0.5       | -0.5      | 0         | 0.055556 | -0.1     | 0.25           |
| 254 | -0.5      | -1.5      | -2        | -0.55556 | -0.8     | -0.25          |
| 255 | 0         | 1         | -0.5      | -0.55556 | 0        | -1.25          |
| 256 | 3         | 1         | -0.5      | 0.111111 | 1.3      | -1.375         |
| 257 | 2         | 0.5       | 0         | -0.44444 | 0.4      | -1.5           |
| 258 | 3         | 2.5       | 2.5       | 1.55556  | 2.8      | 0              |
| 259 | 2.5       | 0.5       | 1.5       | 0.611111 | 1.3      | -0.25          |
| 260 | 3         | 1         | 1         | 0.5      | 1.4      | -0.625         |
| 261 | -1        | -1.5      | -2        | -1.72222 | -1.4     | -2.125         |
| 262 | -1        | 1         | -1        | -0.77778 | -0.8     | -0.75          |
| 263 | 2.5       | 2.5       | 2         | 0.611111 | 2        | -1.125         |
| 264 | 2.5       | 0         | 3.5       | 0.722222 | 1.8      | -0.625         |
| 265 | 0.5       | 2.5       | 0.5       | -0.27778 | 0.3      | -1             |
| 266 | 0         | 0         | 0         | -0.22222 | 0.2      | -0.75          |
| 267 | 0         | 0         | -1        | -1.44444 | -0.8     | -2.25          |
| 268 | 0         | 1         | 1.5       | -0.33333 | 0.5      | -1.375         |
| 269 | -1        | -1        | -1        | -1.72222 | -1.3     | -2.25          |
| 270 | -1        | -1        | -1        | -0.61111 | -0.7     | -0.5           |
| 271 | -0.5      | 1         | -2        | -0.88889 | -0.7     | -1.125         |
| 272 | -0.5      | 0         | 0.5       | 0.111111 | 0.1      | 0.125          |



| ID  | STABLEfit | RELATIONf | HORNORfit | POFIT    | relatedf | achvmtfitscore |
|-----|-----------|-----------|-----------|----------|----------|----------------|
| 273 | -1        | 0         | -0.5      | -0.5     | -0.3     | -0.75          |
| 274 | 1         | 2         | 0.5       | 0.388889 | 1.4      | -0.875         |
| 275 | -1        | -0.5      | -0.5      | -1.22222 | -0.6     | -2             |
| 276 | 0         | 0         | -1        | 0        | -0.2     | 0.25           |
| 277 | 2.5       | 1.5       | 0         | -0.27778 | 0.3      | -1             |
| 278 | 2.5       | 1.5       | -0.5      | -0.38889 | 0.4      | -1.375         |
| 279 | -2.5      | 0         | -1.5      | -1.61111 | -1.2     | -2.125         |
| 280 | 0         | 0         | 0         | -0.16667 | 0        | -0.375         |
| 281 | 2         | 0.5       | 3.5       | 1.055556 | 2.4      | -0.625         |
| 282 | 0         | 1         | -0.5      | -1.05556 | -0.2     | -2.125         |
| 283 | 0         | 1         | -1        | -0.66667 | -0.2     | -1.25          |
| 284 | -0.5      | 0.5       | 1         | -0.33333 | 0.6      | -1.5           |
| 285 | 0         | 0.5       | 0.5       | -0.05556 | 0.3      | -0.5           |
| 286 | 0         | 1         | 1.5       | 0.77778  | 1        | 0.5            |
| 287 | -0.5      | 0         | 0         | 0        | -0.2     | 0.25           |
| 288 | 0         | 0         | 1.5       | 0.944444 | 1.1      | 0.75           |
| 289 | 0.5       | 0         | 0.5       | -0.11111 | -0.3     | 0.125          |
| 290 | 0.5       | 0         | 0         | 0        | 0.1      | -0.125         |
| 291 | 0.5       | 0         | -1        | -0.94444 | -0.5     | -1.5           |
| 292 | -0.5      | 0         | -0.5      | -0.27778 | -0.1     | -0.5           |
| 293 | -1        | 1         | -0.5      | 0.333333 | 0.2      | 0.5            |
| 294 | 0         | 0         | 0         | -0.05556 | 0.2      | -0.375         |
| 295 | -0.5      | 0.5       | -2        | -0.72222 | -0.7     | -0.75          |
| 296 | 0         | 1         | 0         | 0.388889 | -0.2     | 1.125          |
| 297 | -0.5      | 0         | -2        | -0.38889 | -0.7     | 0              |
| 298 | -1        | 1         | -1        | -0.77778 | -0.8     | -0.75          |
| 299 | 0         | 0.5       | -1        | -0.77778 | 0.1      | -1.875         |
| 300 | 1.5       | 1.5       | 0.5       | 0.27778  | 0.9      | -0.5           |
| 301 | 1         | 0.5       | 0         | 0.111111 | 1        | -1             |
| 302 | -1.5      | 1         | -0.5      | -0.88889 | -0.5     | -1.375         |
| 303 | -0.5      | -0.5      | -0.5      | -0.72222 | -0.5     | -1             |
| 304 | -1        | 1         | 1         | -0.61111 | 0.3      | -1.75          |
| 305 | 0.5       | 0         | 1         | -0.22222 | 0.6      | -1.25          |
| 306 | -0.5      | 0.5       | -1.5      | -1.16667 | -0.7     | -1.75          |

| ID  | STABLEfit | RELATIONf | HORNORfit | POFIT    | relatedf | achvmtfitscore |
|-----|-----------|-----------|-----------|----------|----------|----------------|
| 307 | 1         | 1         | 1         | 0.333333 | 1        | -0.5           |
| 308 | 0.5       | -0.5      | 1         | 0.333333 | 0.4      | 0.25           |
| 309 | -0.5      | -1.5      | -1.5      | -1.22222 | -1.5     | -0.875         |
| 310 | 0         | -4        | -1        | -1.22222 | -1.4     | -1             |
| 311 | 2.5       | 0.5       | 1         | -0.16667 | 0.8      | -1.375         |
| 312 | 1         | 2         | 0.5       | 0.055556 | 1.3      | -1.5           |
| 313 | 0.5       | 1         | 1.5       | -0.16667 | 0.9      | -1.5           |
| 314 | -1        | 1         | -2        | -0.77778 | -0.8     | -0.75          |
| 315 | -0.5      | 0         | -1        | -0.61111 | -0.3     | -1             |
| 316 | -1        | -1        | 0         | -1       | -0.4     | -1.75          |
| 317 | 0         | 1         | -0.5      | -0.05556 | 0.3      | -0.5           |
| 318 | -1        | -1        | -1        | -1.05556 | -1       | -1.125         |
| 319 | 1         | -1        | -1        | -0.72222 | -0.6     | -0.875         |
| 320 | 0         | 0         | -1        | -1.05556 | -0.7     | -1.5           |
| 321 | 2         | 0.5       | 0.5       | 0.388889 | 1.2      | -0.625         |
| 322 | 0         | -1        | -0.5      | -1.33333 | -0.9     | -1.875         |
| 323 | 1.5       | 1         | -1        | 0.111111 | 0.8      | -0.75          |
| 324 | 1.5       | 0.5       | 0         | -0.61111 | 0.3      | -1.75          |
| 325 | 0.5       | 0         | 0.5       | -0.11111 | 0.5      | -0.875         |
| 326 | 0         | -1        | 0         | -0.33333 | -0.2     | -0.5           |
| 327 | 0         | 0         | -1        | -0.33333 | 0        | -0.75          |
| 328 | 0         | 0         | 0.5       | -0.38889 | 0        | -0.875         |
| 329 | 0         | 0.5       | -0.5      | 0.111111 | 0        | 0.25           |
| 330 | -1        | -1.5      | 0         | -1.11111 | -0.8     | -1.5           |
| 331 | 1         | 1         | 0         | -0.77778 | 0.3      | -2.125         |
| 332 | 0.5       | 0         | 0.5       | 1.05556  | 0.7      | 1.5            |
| 333 | 1         | 2.5       | 2.5       | 0.666667 | 2.1      | -1.125         |
| 334 | 0         | 1         | 0         | 0.111111 | 0.2      | 0              |
| 335 | 0         | 0         | 0         | 0.222222 | 0.1      | 0.375          |
| 336 | 0         | -1        | -1        | -1.33333 | -0.8     | -2             |
| 337 | -0.5      | -0.5      | 0         | 0.333333 | -0.2     | 1              |
| 338 | 2.5       | 2         | 1         | 0.722222 | 1.7      | -0.5           |
| 339 | -1        | -1        | 0         | -1.11111 | -0.6     | -1.75          |
| 340 | 0         | 1         | 0         | -0.72222 | -0.4     | -1.125         |

| ID  | STABLEfit | RELATIONf | HORNORfit | POFIT    | relatedf | achvmntfitscore |
|-----|-----------|-----------|-----------|----------|----------|-----------------|
| 341 | 0         | -1        | -1.5      | -2       | -1.2     | -3              |
| 342 | 0         | 0         | 0         | -0.16667 | 0.1      | -0.5            |
| 343 | -0.5      | -0.5      | -1.5      | -1.5     | -0.7     | -2.5            |
| 344 | -1        | 1.5       | 0.5       | 0.722222 | 0.5      | 1               |
| 345 | -0.5      | 0         | 0         | -1       | -0.4     | -1.75           |
| 346 | -1        | 0         | 0         | -0.55556 | -0.2     | -1              |
| 347 | -1        | 0.5       | 1.5       | -1       | -0.5     | -1.625          |
| 348 | -1        | 0         | -1        | -0.61111 | -0.6     | -0.625          |
| 349 | -1        | 0         | -1.5      | -0.77778 | -0.7     | -0.875          |
| 350 | 0.5       | -0.5      | 2         | 0.388889 | 0.4      | 0.375           |
| 351 | -0.5      | 1.5       | 3.5       | 1.333333 | 1.3      | 1.375           |
| 352 | -1        | 0         | -2        | 0.222222 | -0.9     | 1.625           |
| 353 | -0.5      | -0.5      | -1.5      | -0.44444 | -0.8     | 0               |
| 354 | 0         | 1.5       | 1.5       | 0.222222 | 1.5      | -1.375          |
| 355 | 3.5       | 3.5       | 2         | 1.444444 | 2.9      | -0.375          |
| 356 | -0.5      | -1        | -3        | -1.83333 | -1.7     | -2              |
| 357 | 0         | 0         | 0.5       | 0.166667 | 0        | 0.375           |
| 358 | 0.5       | 1.5       | 1.5       | -0.16667 | 0.8      | -1.375          |
| 359 | -1        | -1        | -0.5      | -1.61111 | -0.7     | -2.75           |
| 360 | -1.5      | -0.5      | 0         | -1.38889 | -0.7     | -2.25           |
| 361 | -0.5      | -1        | -3        | -2.16667 | -1.5     | -3              |
| 362 | 0.5       | 0.5       | 1         | -0.38889 | 0.5      | -1.5            |
| 363 | 1         | 0.5       | -0.5      | -0.94444 | 0.2      | -2.375          |
| 364 | -0.5      | -0.5      | 1         | -0.38889 | 0.2      | -1.125          |
| 365 | 0.5       | 1.5       | -0.5      | -0.72222 | 0.5      | -2.25           |
| 366 | 2         | 2         | 2.5       | 0.388889 | 1.6      | -1.125          |
| 367 | 2         | 0         | 0.5       | -0.05556 | 1        | -1.375          |
| 368 | 1         | 1.5       | 1         | -0.27778 | 0.7      | -1.5            |
| 369 | -2        | 2         | 1.5       | -0.16667 | 0.5      | -1              |
| 370 | 1.5       | 0         | 0         | 1.11111  | 1.1      | 1.125           |
| 371 | -1        | 1         | 0         | -0.27778 | 0.3      | -1              |
| 372 | -0.5      | 0.5       | 1.5       | 0.222222 | 0.5      | -0.125          |
| 373 | 0.5       | 0         | 1.5       | 0.833333 | 0.7      | 1               |
| 374 | 0.5       | 0         | 0         | -1       | -0.6     | -1.5            |

| ID  | STABLEfit | RELATIONf | HORNORfit | POFIT    | relatedf | achvmtfitscore |
|-----|-----------|-----------|-----------|----------|----------|----------------|
| 375 | 0         | 0         | 0         | -0.11111 | 0        | -0.25          |
| 376 | -0.5      | 0.5       | 1.5       | 0.27778  | 0.5      | 0              |
| 377 | 0.5       | 1         | 0         | 0.44444  | 0.5      | 0.375          |
| 378 | 0.5       | 0.5       | 1         | -0.38889 | 0.6      | -1.625         |
| 379 | -0.5      | -1        | -2        | -1.44444 | -1       | -2             |
| 380 | 0         | 0         | 0.5       | -0.27778 | 0.4      | -1.125         |
| 381 | 2.5       | -1        | 1.5       | 0.16667  | 0.9      | -0.75          |
| 382 | 1.5       | 0         | 0.5       | -0.16667 | 1.2      | -1.875         |
| 383 | 0         | 0.5       | 0         | -0.88889 | -0.1     | -1.875         |
| 384 | 1.5       | 2.5       | 1         | 0.05556  | 1.1      | -1.25          |
| 385 | -2        | -2        | -0.5      | -0.66667 | -1       | -0.25          |
| 386 | -0.5      | 0         | 0         | -0.44444 | -0.1     | -0.875         |
| 387 | 0         | 0         | 0.5       | -0.77778 | 0.2      | -2             |
| 388 | -2        | 0         | 0         | -0.5     | -0.9     | 0              |
| 389 | 1.5       | 2         | 1.5       | 0.88889  | 1.5      | 0.125          |
| 390 | -0.5      | -1        | -0.5      | -0.72222 | -0.8     | -0.625         |
| 391 | -1.5      | 0         | 0         | -0.88889 | -0.4     | -1.5           |
| 392 | 0         | 2         | -0.5      | 0.05556  | 1        | -1.125         |
| 393 | -2        | -0.5      | -2        | -0.61111 | -1       | -0.125         |
| 394 | 0.5       | 1         | 0.5       | 0.94444  | 0.3      | 1.75           |
| 395 | 2         | 1         | 0         | 1.16667  | 1.3      | 1              |
| 396 | 0         | -1        | -1        | -0.66667 | -0.8     | -0.5           |
| 397 | -1        | -1        | -1.5      | -0.72222 | -0.7     | -0.75          |
| 398 | 1.5       | -1        | 0.5       | -0.66667 | 0        | -1.5           |
| 399 | 1         | -0.5      | -1.5      | -0.66667 | -0.6     | -0.75          |
| 400 | -1        | -1        | 0         | -0.77778 | -0.7     | -0.875         |
| 401 | 0.5       | 0         | -2        | -1.05556 | -0.7     | -1.5           |
| 402 | 3         | 4         | 2.5       | 1.27778  | 2.7      | -0.5           |
| 403 | -0.5      | 0         | 2.5       | 0.72222  | 0.6      | 0.875          |
| 404 | -1        | 0         | -1        | -1.16667 | -0.6     | -1.875         |
| 405 | 0.5       | 0         | -0.5      | 0.11111  | 0        | 0.25           |
| 406 | -1        | -1        | -1.5      | -1.44444 | -1.3     | -1.625         |
| 407 | 2.5       | 2.5       | 2.5       | 0.27778  | 1.7      | -1.5           |
| 408 | -1        | 0.5       | -2        | -0.22222 | -0.3     | -0.125         |

| ID  | STABLEfit | RELATIONf | HORNORfit | POFIT    | relatedf | achvmtfitscore |
|-----|-----------|-----------|-----------|----------|----------|----------------|
| 409 | -1        | -0.5      | -1.5      | -1.16667 | -1       | -1.375         |
| 410 | -1        | 0         | -2        | -1.33333 | -1       | -1.75          |
| 411 | 0.5       | 0.5       | 0         | -0.55556 | 0        | -1.25          |
| 412 | -2        | 0         | -2        | -1.66667 | -1.2     | -2.25          |
| 413 | 0         | 1         | 0         | 0.222222 | 0.4      | 0              |
| 414 | -2        | -1        | -2        | -1.38889 | -1.5     | -1.25          |
| 415 | 0         | -0.5      | -1        | -1.05556 | -0.6     | -1.625         |
| 416 | -1        | 0         | -1        | -0.66667 | -0.7     | -0.625         |
| 417 | 2         | 0         | 1         | -0.22222 | 0.8      | -1.5           |
| 418 | -0.5      | -1        | -0.5      | -0.77778 | -0.6     | -1             |
| 419 | 0.5       | 1         | 2.5       | 0.5      | 0.9      | 0              |
| 420 | 1.5       | 2.5       | 1.5       | 1.27778  | 1.7      | 0.75           |
| 421 | -2        | -1.5      | -1        | -1.55556 | -1       | -2.25          |
| 422 | -0.5      | -1        | 0         | -0.77778 | -0.5     | -1.125         |
| 423 | -0.5      | 0         | 0         | -0.38889 | 0        | -0.875         |
| 424 | -1        | -1        | -1        | -0.88889 | -1       | -0.75          |
| 425 | -1        | 1.5       | -3        | -1.5     | -0.8     | -2.375         |
| 426 | 0.5       | -1        | -0.5      | 0.27778  | 0.1      | 0.5            |
| 427 | -0.5      | 0         | -1        | -0.5     | -0.3     | -0.75          |
| 428 | 0         | 1.5       | 0         | -0.05556 | 0.3      | -0.5           |
| 429 | 1.5       | 0         | 0.5       | 0.055556 | 0.9      | -1             |
| 430 | 0         | 0         | -1        | -0.38889 | -0.3     | -0.5           |
| 431 | 0         | -1        | 0         | 0.166667 | -0.4     | 0.875          |
| 432 | -0.5      | -0.5      | -0.5      | -0.83333 | -0.7     | -1             |
| 433 | 1.5       | 0         | -0.5      | 0.722222 | 0.3      | 1.25           |
| 434 | 0         | 0         | 0         | 0.111111 | 0.1      | 0.125          |
| 435 | 1         | 2         | 2.5       | 0.166667 | 1.4      | -1.375         |
| 436 | 2         | 1.5       | 1.5       | 0.833333 | 1.6      | -0.125         |
| 437 | 0         | -0.5      | -1        | -0.66667 | -0.5     | -0.875         |
| 438 | 0         | 1         | -1        | -0.22222 | 0        | -0.5           |
| 439 | -3        | 0.5       | 0         | -0.77778 | -0.4     | -1.25          |
| 440 | 0.5       | -0.5      | 0         | 0.166667 | 0.4      | -0.125         |
| 441 | -0.5      | 0         | -1        | -0.27778 | -0.5     | 0              |
| 442 | -1        | -0.5      | -0.5      | -1.11111 | -0.5     | -1.875         |

| ID  | STABLEfit | RELATIONf | HORNORfit | POFIT    | relatedf | achvmtfitscore |
|-----|-----------|-----------|-----------|----------|----------|----------------|
| 443 | -3        | 0         | -1        | -1.44444 | -1.4     | -1.5           |
| 444 | 3.5       | 3.5       | 3.5       | 1.277778 | 3.1      | -1             |
| 445 | 0         | 1         | 0.5       | 0.055556 | 0        | 0.125          |
| 446 | -2        | 0         | 0.5       | -0.5     | -0.4     | -0.625         |
| 447 | 1         | 0.5       | 0.5       | 0        | 1        | -1.25          |
| 448 | -4        | -1        | 0         | -1.66667 | -1.4     | -2             |
| 449 | 0.5       | 0         | -0.5      | -0.55556 | 0.2      | -1.5           |
| 450 | -1.5      | 0         | -0.5      | -0.77778 | -0.5     | -1.125         |
| 451 | 0         | 1.5       | -1        | 0.388889 | 0.8      | -0.125         |
| 452 | -1        | 0         | -0.5      | -1.11111 | -0.8     | -1.5           |
| 453 | -1        | -1        | -1.5      | -0.27778 | -0.8     | 0.375          |
| 454 | -1        | -1        | -1        | -1.11111 | -0.6     | -1.75          |
| 455 | -2        | 0         | -0.5      | -0.55556 | -0.7     | -0.375         |
| 456 | 2.5       | 1         | 0         | 1.444444 | 1.2      | 1.75           |
| 457 | 0         | 2         | 1         | 0.444444 | 1        | -0.25          |
| 458 | -1        | 0         | 1.5       | -0.22222 | 0        | -0.5           |
| 459 | 0         | -0.5      | -2        | -1.11111 | -0.7     | -1.625         |
| 460 | 0         | 1.5       | 2.5       | 1.222222 | 1        | 1.5            |
| 461 | 0.5       | 1         | 1         | 0.611111 | 1        | 0.125          |
| 462 | -1        | 0         | -1        | -1.44444 | -0.8     | -2.25          |
| 463 | 0         | -3        | -0.5      | -0.16667 | -0.8     | 0.625          |
| 464 | 0.5       | 0.5       | 1.5       | 0.111111 | 0.4      | -0.25          |
| 465 | -0.5      | 1         | 0         | -0.66667 | 0        | -1.5           |
| 466 | 0         | 1         | 0         | -0.88889 | 0.1      | -2.125         |
| 467 | 0         | 0         | 0.5       | 0.222222 | 0.4      | 0              |
| 468 | 0.5       | 1         | 0         | -0.11111 | 0.8      | -1.25          |
| 469 | 0         | 1         | 1         | 0.555556 | 0.8      | 0.25           |
| 470 | -1        | -1.5      | 0.5       | -0.44444 | -0.7     | -0.125         |
| 471 | -1        | 0         | -1.5      | -0.5     | -1.1     | 0.25           |
| 472 | -1        | 1         | 0         | -0.22222 | 0.6      | -1.25          |
| 473 | -1        | 0         | 1.5       | -0.27778 | 0.4      | -1.125         |
| 474 | -0.5      | -0.5      | -1        | -0.83333 | -0.5     | -1.25          |
| 475 | -1.5      | -1        | -1        | -1.22222 | -0.7     | -1.875         |
| 476 | 0         | -1        | -2        | -1.66667 | -1.2     | -2.25          |

| ID  | STABLEfit | RELATIONf | HORNORfit | POFIT    | relatedfj | achvmntfitscore |
|-----|-----------|-----------|-----------|----------|-----------|-----------------|
| 477 | 1.5       | 0.5       | -0.5      | 0.5      | 0.5       | 0.5             |
| 478 | -1        | 0         | 0         | -0.5     | -0.1      | -1              |
| 479 | -1        | 0         | -1.5      | -1.16667 | -1        | -1.375          |
| 480 | 1         | 4         | 3.5       | 1.277778 | 3         | -0.875          |
| 481 | -1        | 1         | -0.5      | -0.38889 | 0.3       | -1.25           |
| 482 | 3.5       | 1.5       | 2         | 0.833333 | 2.3       | -1              |
| 483 | 0         | 1.5       | 0         | -0.88889 | 0.6       | -2.75           |
| 484 | 0         | -1        | 0.5       | 0.388889 | -0.1      | 1               |
| 485 | -1.5      | -0.5      | -2        | -1.05556 | -0.9      | -1.25           |
| 486 | -3        | -0.5      | -0.5      | -1.83333 | -1.3      | -2.5            |
| 487 | -1.5      | 0         | -1        | -1.16667 | -0.6      | -1.875          |
| 488 | 0.5       | 0.5       | 1         | 1.055556 | 0.8       | 1.375           |
| 489 | 0         | 1         | -3        | -0.94444 | 0         | -2.125          |
| 490 | 0         | 1         | 0.5       | -0.77778 | 0.4       | -2.25           |
| 491 | -0.5      | -1        | -2.5      | -1.66667 | -1.6      | -1.75           |
| 492 | 3         | -2        | 0.5       | -0.72222 | 0.3       | -2              |
| 493 | -1        | 0         | -0.5      | -0.16667 | -0.2      | -0.125          |
| 494 | 2         | 0         | 1         | 0.722222 | 0.7       | 0.75            |
| 495 | -4        | 0         | -1        | -2.44444 | -1.8      | -3.25           |
| 496 | 2         | -1        | 0         | 0.722222 | 0.5       | 1               |
| 497 | 1.5       | 0         | 1.5       | 0.944444 | 0.7       | 1.25            |
| 498 | -1        | 0         | -1        | -0.72222 | -0.8      | -0.625          |
| 499 | 0         | 1         | 0         | -0.16667 | 0.4       | -0.875          |
| 500 | 0         | 0         | 1         | -0.27778 | -0.1      | -0.5            |
| 501 | 1.5       | 1.5       | -2.5      | -1.16667 | -0.1      | -2.5            |
| 502 | 0         | 1         | 2.5       | -0.44444 | 0.5       | -1.625          |
| 503 | -3        | 1         | -0.5      | -0.77778 | -0.3      | -1.375          |
| 504 | 0.5       | 1.5       | 1         | -0.11111 | 0.9       | -1.375          |
| 505 | 0         | 1         | 0.5       | -0.88889 | 0.3       | -2.375          |
| 506 | 2.5       | 1.5       | 2.5       | -0.05556 | 1.9       | -2.5            |
| 507 | -0.5      | 0         | 1         | -0.55556 | 0.4       | -1.75           |
| 508 | -1.5      | 2         | 1.5       | 0.444444 | 0         | 1               |
| 509 | 0.5       | 0.5       | -0.5      | -0.83333 | 0         | -1.875          |
| 510 | -2        | -1        | -0.5      | -1.88889 | -1        | -3              |

| ID  | STABLEfit | RELATIONf | HORNORfit | POFIT    | relatedf | achvmtfitscore |
|-----|-----------|-----------|-----------|----------|----------|----------------|
| 511 | -1        | 0         | -0.5      | -0.83333 | -0.8     | -0.875         |
| 512 | 0         | -0.5      | 0         | -0.83333 | -0.2     | -1.625         |
| 513 | -2        | -1        | -3        | -2.33333 | -1.6     | -3.25          |
| 514 | 1         | 1         | 0.5       | 0        | 1.3      | -1.625         |
| 515 | -1.5      | 0.5       | -1.5      | -1.5     | -0.6     | -2.625         |
| 516 | -1        | 1         | 0.5       | -0.11111 | -0.2     | 0              |
| 517 | 0.5       | 1         | -1        | 0.38889  | 0.1      | 0.75           |
| 518 | -0.5      | -1.5      | 0.5       | -0.38889 | 0        | -0.875         |
| 519 | -1        | -1        | 0.5       | -0.44444 | -0.4     | -0.5           |
| 520 | -1        | 0.5       | 0.5       | -0.22222 | 0.1      | -0.625         |
| 521 | 0         | -1        | -1.5      | -0.72222 | -1       | -0.375         |
| 522 | 2         | -1        | -1        | -0.05556 | -0.2     | 0.125          |
| 523 | 0         | 0         | 0         | 0        | 0        | 0              |
| 524 | -1        | -1        | -1        | -0.66667 | -1       | -0.25          |
| 525 | 0.5       | 0         | -0.5      | 0.05556  | 0.7      | -0.75          |
| 526 | -0.5      | -0.5      | 0.5       | -0.05556 | -0.1     | 0              |
| 527 | 0         | 0         | 1         | -0.72222 | -0.4     | -1.125         |
| 528 | 0         | 0.5       | 1         | 0.33333  | 0.8      | -0.25          |
| 529 | -1        | 0         | -0.5      | 0.44444  | 0.1      | 0.875          |
| 530 | -1        | 0         | -1        | -0.77778 | -0.5     | -1.125         |
| 531 | -1        | 0         | -1        | -1.11111 | -0.6     | -1.75          |
| 532 | 0         | 0         | 0         | -0.38889 | 0        | -0.875         |
| 533 | -1        | -1        | -2        | -1.22222 | -1       | -1.5           |
| 534 | 1.5       | 0         | 0.5       | 0.72222  | 0.3      | 1.25           |
| 535 | -0.5      | -1        | -1        | -1.66667 | -1.2     | -2.25          |
| 536 | -0.5      | 1.5       | 0.5       | 0.16667  | 0.3      | 0              |
| 537 | 0         | 0.5       | -0.5      | -0.44444 | -0.3     | -0.625         |
| 538 | 3.5       | 2.5       | 2.5       | 1.22222  | 3        | -1             |
| 539 | -1        | 0         | 0         | -0.22222 | -0.1     | -0.375         |
| 540 | -1        | 1         | 1         | 0.27778  | 0.3      | 0.25           |
| 541 | 1.5       | 1         | 0.5       | 0.83333  | 1.1      | 0.5            |
| 542 | -1        | 0         | -1        | -1.22222 | -0.6     | -2             |
| 543 | 0.5       | 0.5       | 1         | 0.22222  | 0.9      | -0.625         |
| 544 | 0.5       | 0         | 0         | 0.05556  | 0.5      | -0.5           |



| ID  | STABLEfit | RELATIONf | HORNORfit | POFIT    | relatedf | achvmtfitscore |
|-----|-----------|-----------|-----------|----------|----------|----------------|
| 545 | -1        | 0         | -1        | -0.88889 | -0.6     | -1.25          |
| 546 | -1        | 1         | -3        | -0.72222 | -1.1     | -0.25          |
| 547 | 1.5       | 2         | 2         | 1.61111  | 1.8      | 1.375          |
| 548 | -1.5      | -1        | -1.5      | -1.27778 | -1.5     | -1             |
| 549 | 1         | 2.5       | 1.5       | 0.77778  | 2        | -0.75          |
| 550 | 0.5       | 0         | 0         | 0.16667  | 0.3      | 0              |
| 551 | -0.5      | -2        | -1.5      | -1.55556 | -1.3     | -1.875         |
| 552 | -1        | -1        | 0         | 0.11111  | -0.6     | 1              |
| 553 | -1        | -1        | -1        | -0.55556 | -0.8     | -0.25          |
| 554 | -2        | 0         | -1        | -0.94444 | -0.8     | -1.125         |
| 555 | -1.5      | -0.5      | 0         | 0.38889  | -0.9     | 2              |
| 556 | 1.5       | 2.5       | 0.5       | 1.16667  | 1.3      | 1              |
| 557 | 0.5       | 1.5       | 0         | 0.5      | 0.7      | 0.25           |
| 558 | -2.5      | 0.5       | -2.5      | 0.05556  | -0.7     | 1              |
| 559 | -2        | -0.5      | -1        | -0.11111 | -0.8     | 0.75           |
| 560 | -0.5      | 0         | -0.5      | 0.16667  | -0.1     | 0.5            |
| 561 | 1.5       | 0         | -1        | 1.5      | 1        | 2.125          |
| 562 | 0.5       | 1         | -1.5      | -0.5     | -0.1     | -1             |
| 563 | 1.5       | 0.5       | 1.5       | -0.44444 | 0.7      | -1.875         |
| 564 | 0         | -1        | -0.5      | -0.44444 | -0.3     | -0.625         |
| 565 | 0.5       | 0         | 0         | -0.33333 | 0        | -0.75          |
| 566 | -0.5      | 0         | 1         | 0.27778  | 0.2      | 0.375          |
| 567 | -1.5      | 0         | 0.5       | 0        | -0.1     | 0.125          |
| 568 | -1.5      | -1        | -2        | -1.83333 | -1.2     | -2.625         |
| 569 | -0.5      | -0.5      | -1        | -0.88889 | -0.5     | -1.375         |
| 570 | -1        | 0.5       | 0         | -0.66667 | -0.5     | -0.875         |
| 571 | 1         | 0         | 1         | -0.38889 | 0.7      | -1.75          |
| 572 | -0.5      | 1         | 1         | 0.72222  | 0.6      | 0.875          |
| 573 | 1         | 0.5       | 0.5       | 0.94444  | 0.9      | 1              |
| 574 | -2        | 0         | -1        | -1.05556 | -0.7     | -1.5           |
| 575 | -2        | -1        | -1        | -1.66667 | -1.2     | -2.25          |
| 576 | -1        | 0         | -0.5      | -0.88889 | -0.2     | -1.75          |
| 577 | 2.5       | 2         | 1.5       | 0.94444  | 2        | -0.375         |
| 578 | 0         | 0         | 0.5       | 0.22222  | 0.1      | 0.375          |

| ID  | STABLEfit | RELATIONf | HORNORfit | POFIT    | relatedf | achvmtfitscore |
|-----|-----------|-----------|-----------|----------|----------|----------------|
| 579 | 1.5       | 1         | 2         | 0.333333 | 1.7      | -1.375         |
| 580 | 0.5       | 0         | -0.5      | -1.05556 | 0        | -2.375         |
| 581 | 4         | 3.5       | 3.5       | 1.166667 | 2.9      | -1             |
| 582 | 1         | 0.5       | 0.5       | -0.88889 | 0        | -2             |
| 583 | 1         | 0.5       | -1        | -0.33333 | -0.1     | -0.625         |
| 584 | 2         | 1.5       | 1         | 0.944444 | 2        | -0.375         |
| 585 | 0.5       | 2         | 1         | -0.22222 | 1        | -1.75          |
| 586 | -1        | -0.5      | -0.5      | -0.77778 | -0.2     | -1.5           |
| 587 | 0         | 0.5       | -2        | -0.05556 | -0.6     | 0.625          |
| 588 | 2         | 1         | 2.5       | 0.277778 | 1.6      | -1.375         |
| 589 | -0.5      | 0         | -1.5      | -1.66667 | -1.5     | -1.875         |
| 590 | -4        | 1         | -2        | -0.77778 | -1.5     | 0.125          |
| 591 | 2         | 1.5       | 1         | 0.166667 | 1.4      | -1.375         |
| 592 | -3        | 0         | -1.5      | -1.66667 | -1.4     | -2             |
| 593 | -0.5      | -1        | -1        | -0.94444 | -0.7     | -1.25          |
| 594 | 1         | 1         | -0.5      | 0.388889 | 0.5      | 0.25           |
| 595 | -0.5      | -0.5      | -1        | -1.33333 | -1.3     | -1.375         |
| 596 | 0         | 0         | -0.5      | 0.777778 | 0.3      | 1.375          |
| 597 | 1         | 2.5       | 0.5       | 0.111111 | 1.3      | -1.375         |
| 598 | -1        | 0         | 0         | -0.11111 | 0.3      | -0.625         |
| 599 | -2.5      | 0         | -2        | -2       | -1.3     | -2.875         |
| 600 | -3.5      | 0.5       | 0.5       | -1.38889 | -1.7     | -1             |
| 601 | -1        | -1        | 0         | -0.77778 | -0.9     | -0.625         |
| 602 | 1.5       | 2         | -2.5      | -0.94444 | 0.4      | -2.625         |
| 603 | 4         | 3.5       | 3         | 0.666667 | 2.6      | -1.75          |
| 604 | -1.5      | -0.5      | -1.5      | -1.44444 | -1.2     | -1.75          |
| 605 | -3        | 0.5       | 0.5       | -0.94444 | -1.2     | -0.625         |
| 606 | 2         | 1         | -0.5      | 0        | 0.7      | -0.875         |
| 607 | 1         | 2         | 0.5       | -0.77778 | 0.6      | -2.5           |
| 608 | 1         | 0.5       | -1        | -0.44444 | -0.2     | -0.75          |
| 609 | 0.5       | 1.5       | 0.5       | -0.22222 | 0.7      | -1.375         |
| 610 | -1.5      | -0.5      | -1.5      | -1.44444 | -1.2     | -1.75          |
| 611 | 1.5       | 1         | 0.5       | 0.333333 | 0.9      | -0.375         |
| 612 | 1.5       | 1         | -0.5      | -0.11111 | 0.6      | -1             |

| ID  | STABLEfit | RELATIONf | HORNORfit | POFIT     | relatedf | achvmtfitscore |
|-----|-----------|-----------|-----------|-----------|----------|----------------|
| 613 | 0.5       | 1.5       | 3         | 0.277778  | 1.4      | -1.125         |
| 614 | -1.5      | 0         | 1.5       | 0.222222  | -0.1     | 0.625          |
| 615 | -1        | 0.5       | -1        | -0.611111 | -0.6     | -0.625         |
| 616 | 1         | 0.5       | 0.5       | 0.388889  | 0.8      | -0.125         |
| 617 | -1        | -1        | 1         | 0         | -0.2     | 0.25           |
| 618 | -1        | -1        | -1        | -0.944444 | -0.7     | -1.25          |
| 619 | 1.5       | 0         | 0.5       | 0.611111  | 0.7      | 0.5            |
| 620 | -1        | 0         | -0.5      | -0.66667  | -0.2     | -1.25          |
| 621 | -1        | 0         | 0.5       | -0.38889  | -0.4     | -0.375         |
| 622 | -0.5      | 0         | 0         | -0.5      | -0.4     | -0.625         |
| 623 | 0         | -0.5      | -3        | -2.05556  | -1.3     | -3             |
| 624 | -1        | 1.5       | 0         | -0.66667  | 0.5      | -2.125         |
| 625 | -0.5      | 1         | -0.5      | 0.166667  | -0.6     | 1.125          |
| 626 | 0         | -1        | -2        | -0.33333  | -0.8     | 0.25           |
| 627 | -1        | 0         | -1        | -1.22222  | -0.8     | -1.75          |
| 628 | 0.5       | 0         | -2.5      | -0.66667  | -0.3     | -1.125         |
| 629 | -1        | 0         | 0.5       | -1.16667  | -0.3     | -2.25          |
| 630 | -1        | 0         | -2        | -0.66667  | -0.4     | -1             |
| 631 | 0         | 0         | -2        | -0.94444  | -0.4     | -1.625         |
| 632 | 0         | 1         | -2        | -0.33333  | 0        | -0.75          |
| 633 | 0         | 0.5       | -1        | 0.444444  | 0.3      | 0.625          |
| 634 | -0.5      | 0         | -0.5      | -0.88889  | -0.6     | -1.25          |
| 635 | -1        | -1        | -2        | -2.11111  | -1.6     | -2.75          |
| 636 | 1         | 2.5       | 0.5       | 0.888889  | 1        | 0.75           |
| 637 | -0.5      | -0.5      | 0         | -0.33333  | -0.2     | -0.5           |
| 638 | 1         | -2        | 0.5       | 0.166667  | 0.3      | 0              |
| 639 | 0         | -0.5      | -1.5      | -0.55556  | -1.1     | 0.125          |
| 640 | 0.5       | -0.5      | -1        | -1.33333  | 0        | -3             |
| 641 | 2         | -0.5      | 1.5       | 0.611111  | 0.8      | 0.375          |
| 642 | 2         | -1        | -1        | -1.11111  | -0.4     | -2             |
| 643 | -1        | 2         | -0.5      | -0.61111  | -0.1     | -1.25          |
| 644 | 0.5       | 0         | -2        | -1.11111  | -0.1     | -2.375         |
| 645 | -1        | 1         | 0         | 0.333333  | 0.1      | 0.625          |
| 646 | 0         | 2         | 0         | 0         | 0.2      | -0.25          |

| ID  | STABLEfit | RELATIONf | HORNORfit | POFIT     | relatedfj | achvmtfitscore |
|-----|-----------|-----------|-----------|-----------|-----------|----------------|
| 647 | 0         | 2         | 2         | 0.944444  | 0.8       | 1.125          |
| 648 | 1.5       | 0         | 0.5       | 0.333333  | 0.7       | -0.125         |
| 649 | 1         | 1         | 0.5       | 0.722222  | 1         | 0.375          |
| 650 | 0         | 1         | 2         | -0.055556 | 0.6       | -0.875         |
| 651 | -3        | -1        | -4        | -2.22222  | -2.2      | -2.25          |
| 652 | -1        | -1        | -2        | -1.38889  | -1.4      | -1.375         |
| 653 | 1.5       | 0.5       | 1.5       | 0.888889  | 1.1       | 0.625          |
| 654 | 1         | 1         | 0         | 0.555556  | 0.7       | 0.375          |
| 655 | 1         | 0.5       | 1         | -0.38889  | 0.6       | -1.625         |
| 656 | 0         | 0.5       | -0.5      | -1.33333  | -0.9      | -1.875         |
